# Supplementary material for: The impact of coding germline variants on contralateral breast cancer risk and survival
Source: PubMed Central journal article supplement — Am J Hum Genet. 2023 Feb 23;110(3):475–86. doi: 10.1016/j.ajhg.2023.02.003 (PMC10027471; doi:10.1016/j.ajhg.2023.02.003), 2023-02-23
Supplement: mmc1.pdf [file mmc1.pdf]

## Supplemental information

### The impact of coding germline variants on contralateral breast cancer risk and survival

Anna Morra, Nasim Mavaddat, Taru A. Muranen, Thomas U. Ahearn, Jamie Allen, Irene L. Andrulis, Päivi Auvinen, Heiko Becher, Sabine Behrens, Carl Blomqvist, Stig E. Bojesen, Manjeet K. Bolla, Hiltrud Brauch, Nicola J. Camp, Sara Carvalho, Jose E. Castelao, Melissa H. Cessna, Jenny Chang-Claude, Georgia Chenevix-Trench, NBCS Collaborators, Kamila Czene, Brennan Decker, Joe Dennis, Thilo Dörk, Leila Dorling, Alison M. Dunning, Arif B. Ekici, Mikael Eriksson, D. Gareth Evans, Peter A. Fasching, Jonine D. Figueroa, Henrik Flyger, Manuela Gago-Dominguez, Montserrat García-Closas, Willemina R.R. Geurts-Giele, Graham G. Giles, Pascal Guénel, Melanie Gündert, Eric Hahnen, Per Hall, Ute Hamann, Patricia A. Harrington, Wei He, Päivi Heikkilä, Maartje J. Hooning, Reiner Hoppe, Anthony Howell, Keith Humphreys, kConFab Investigators, Anna Jakubowska, Audrey Y. Jung, Renske Keeman, Vessela N. Kristensen, Jan Lubiński, Arto Mannermaa, Mehdi Manoochehri, Siranoush Manoukian, Sara Margolin, Dimitrios Mavroudis, Roger L. Milne, Anna Marie Mulligan, William G. Newman, Tjoung-Won Park-Simon, Paolo Peterlongo, Paul D.P. Pharoah, Valerie Rhenius, Emmanouil Saloustros, Elinor J. Sawyer, Rita K. Schmutzler, Mitul Shah, Amanda B. Spurdle, Ian Tomlinson, Thérèse Truong, Elke M. van Veen, Maaïke P.G. Vreeswijk, Qin Wang, Camilla Wendt, Xiaohong R. Yang, Heli Nevanlinna, Peter Devilee, Douglas F. Easton, and Marjanka K. Schmidt

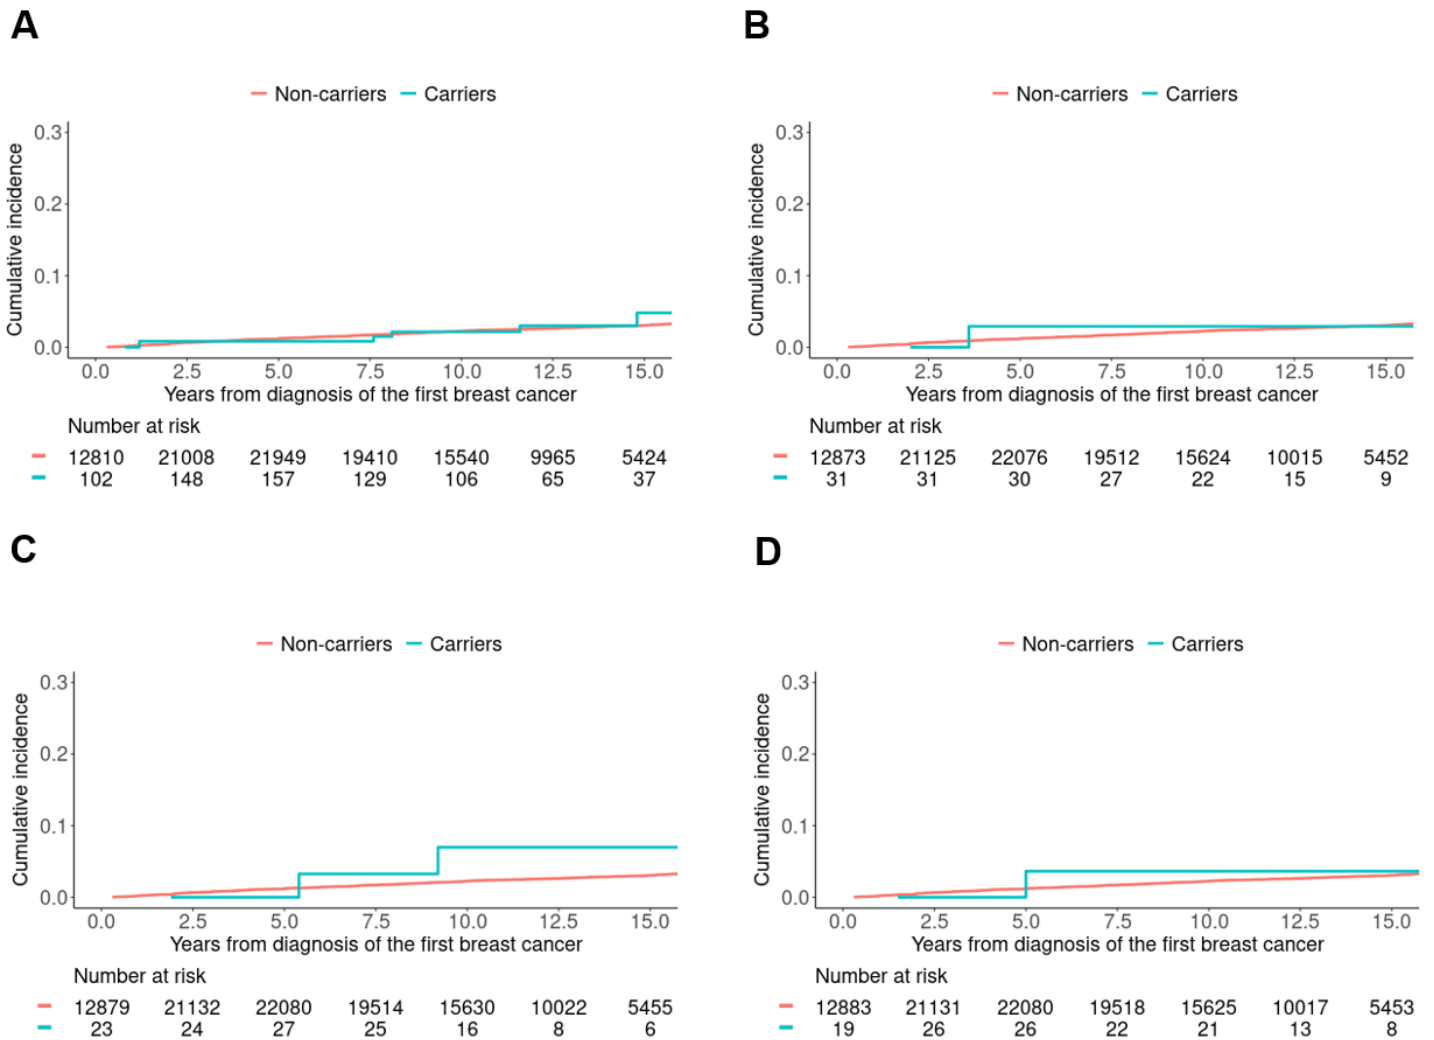

**Figure S1. Cumulative incidence curves of contralateral breast cancer occurrence in the presence of competing risk of death for any cause.**

Cumulative incidence for carriers (blue line) and non-carriers (red line) of: protein-truncating variants (PTVs) in *ATM* (panel A), PTVs in *BARD1* (panel B), PTVs in *RAD51C* (panel C), PTVs in *RAD51D* (panel D). PTVs as in Dorling et al. (NEJM, 2021) were considered. The y-axis is limited to the range (0.00,0.30) to better visualize the curves. The x-axis is restricted to 15 years from diagnosis due to the low number of carriers after 15 years follow-up.

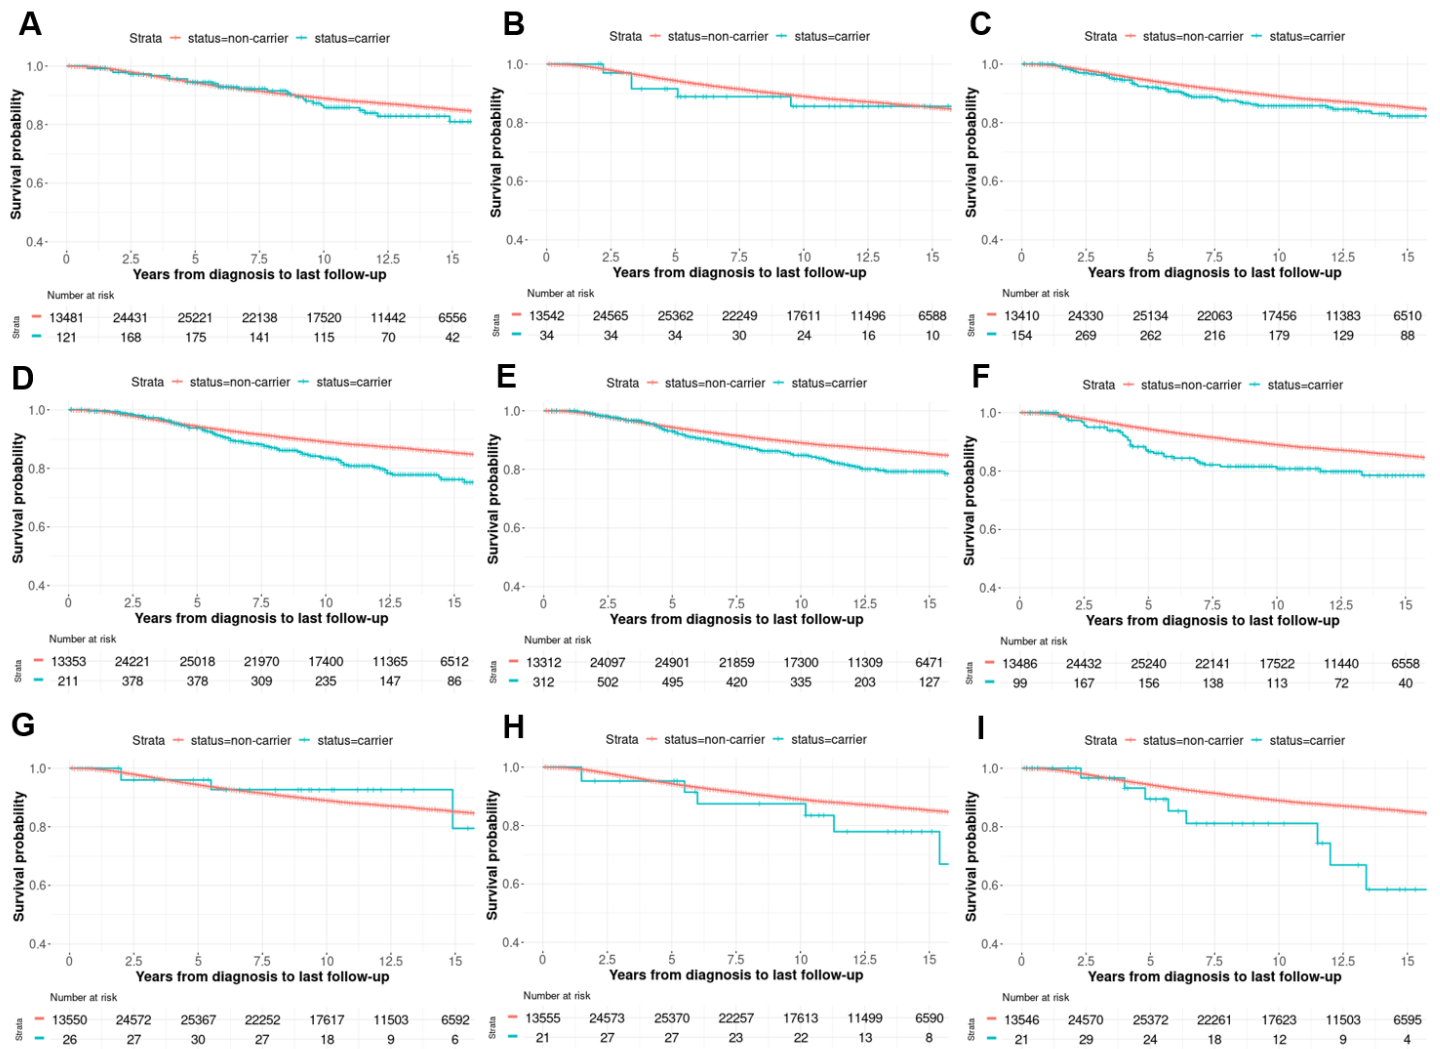

**Figure S2. Kaplan-Meier plots of breast cancer-specific survival.**

Kaplan-Meier plots for carriers (blue line) and non-carriers (red line) of: protein-truncating variants (PTVs) in *ATM* (panel A), PTVs in *BARD1* (panel B), combined PTVs and pathogenic/likely pathogenic missense variants (MSVs) in *BRCA1* (panel C), combined PTVs and pathogenic/likely pathogenic MSVs in *BRCA2* (panel D), PTVs in *CHEK2* (panel E), PTVs in *PALB2* (panel F), PTVs in *RAD51C* (panel G), PTVs in *RAD51D* (panel H), combined PTVs and pathogenic/likely MSVs in *TP53* (panel I). Pathogenic/likely pathogenic MSVs as defined in Dorling et al. (NEJM, 2021) were considered. The y-axis is limited to the range (0.4,1.0) to better visualize the curves. The x-axis is restricted to 15 years from diagnosis due to the low number of carriers after 15 years follow-up.

**Table S2. Characteristics of the study sample and breast tumors, overall and by ER status of the first breast cancer, excluding women who developed a contralateral breast cancer before study entry.**

|                                           | All                     | ER-positive first BC    | ER-negative first BC    |
|-------------------------------------------|-------------------------|-------------------------|-------------------------|
| Number of women                           | 34401                   | 22590                   | 5665                    |
| Number of all-cause deaths                | 6898                    | 4207                    | 1467                    |
| Number of breast cancer-specific deaths   | 3449                    | 1997                    | 834                     |
| Number of contralateral breast cancers    | 692                     | 433                     | 139                     |
| <b>Age at CBC diagnosis, median (IQR)</b> | <b>60 (52-70)</b>       | <b>60 (52-69)</b>       | <b>57 (47-67)</b>       |
| <b>Characteristics of the first BC</b>    |                         |                         |                         |
| <b>Age at diagnosis, median (IQR)</b>     | <b>56 (48-64)</b>       | <b>57 (49-65)</b>       | <b>54 (45-62)</b>       |
| <b>Year of diagnosis, median (IQR)</b>    | <b>2003 (1999-2006)</b> | <b>2003 (2000-2006)</b> | <b>2002 (1999-2005)</b> |
| Missing, n                                | 447                     | 304                     | 91                      |
| <b>Nodal status, n (%)</b>                |                         |                         |                         |
| Negative                                  | 18292 (63.7)            | 13029 (63.7)            | 3065 (60.5)             |
| Positive                                  | 10441 (36.3)            | 7434 (36.3)             | 2002 (39.5)             |
| Missing, n                                | 5668                    | 2127                    | 598                     |
| <b>Tumor size, n (%)</b>                  |                         |                         |                         |
| ≤2cm                                      | 17306 (65.5)            | 12661 (67.6)            | 2405 (53.1)             |
| >2cm and ≤5cm                             | 8261 (31.2)             | 5535 (29.5)             | 1893 (41.8)             |
| >5cm                                      | 870 (3.3)               | 535 (2.9)               | 232 (5.1)               |
| Missing, n                                | 7964                    | 3859                    | 1135                    |
| <b>Tumor grade, n (%)</b>                 |                         |                         |                         |
| 1                                         | 5667 (20.1)             | 4749 (23.7)             | 234 (4.7)               |
| 2                                         | 13919 (49.5)            | 11024 (55.0)            | 1407 (28.4)             |
| 3                                         | 8556 (30.4)             | 4259 (21.3)             | 3321 (66.9)             |
| Missing, n                                | 6259                    | 2558                    | 703                     |
| <b>ER status, n (%)</b>                   |                         |                         |                         |
| Negative                                  | 5665 (20.0)             | -                       | 5665 (100.0)            |
| Positive                                  | 22590 (80.0)            | 22590 (100.0)           | -                       |
| Missing, n                                | 6146                    | -                       | -                       |
| <b>PR status, n (%)</b>                   |                         |                         |                         |
| Negative                                  | 7886 (32.7)             | 3483 (18.3)             | 4376 (86.1)             |
| Positive                                  | 16261 (67.3)            | 15523 (81.7)            | 707 (13.9)              |
| Missing                                   | 10254                   | 3584                    | 582                     |
| <b>ERBB2 status, n (%)</b>                |                         |                         |                         |
| Negative                                  | 15234 (82.7)            | 12515 (86.0)            | 2589 (69.8)             |
| Positive                                  | 3185 (17.3)             | 2041 (14.0)             | 1122 (30.2)             |
| Missing, n                                | 15982                   | 8034                    | 1954                    |
| <b>Surgery, n (%)</b>                     |                         |                         |                         |
| No surgery                                | 548 (2.2)               | 189 (1.2)               | 49 (1.2)                |
| Breast saving                             | 8391 (34.3)             | 6338 (38.8)             | 1522 (35.9)             |
| Mastectomy (with or without axillary)     | 6379 (26.1)             | 4185 (25.6)             | 1461 (34.5)             |
| Type unknown                              | 9122 (37.3)             | 5639 (34.5)             | 1206 (28.5)             |
| Missing, n                                | 9961                    | 6239                    | 1427                    |
| <b>Radiation, n (%)</b>                   |                         |                         |                         |
| No radiation                              | 6544 (26.3)             | 3947 (23.6)             | 1091 (25.9)             |
| Breast                                    | 6991 (28.1)             | 5310 (31.8)             | 1225 (29.1)             |
| Breast and lymph nodes                    | 2016 (8.1)              | 1443 (8.6)              | 476 (11.3)              |
| Lymph nodes only                          | 318 (1.3)               | 256 (1.5)               | 50 (1.2)                |
| Organ unknown                             | 8980 (36.1)             | 5747 (34.4)             | 1374 (32.6)             |
| Missing, n                                | 9552                    | 5887                    | 1449                    |
| <b>Neoadjuvant chemotherapy, n (%)</b>    |                         |                         |                         |
| No                                        | 20061 (93.9)            | 13487 (95.0)            | 3339 (89.2)             |
| Yes                                       | 1302 (6.1)              | 713 (5.0)               | 406 (10.8)              |
| Missing, n                                | 13038                   | 8390                    | 1920                    |
| <b>Adjuvant chemotherapy, n (%)</b>       |                         |                         |                         |
| No                                        | 14785 (61.9)            | 10485 (65.1)            | 1493 (36.2)             |
| Yes                                       | 9111 (38.1)             | 5629 (34.9)             | 2628 (63.8)             |
| Missing, n                                | 10505                   | 6476                    | 1544                    |
| <b>Endocrine therapy, n (%)</b>           |                         |                         |                         |
| No                                        | 7454 (30.7)             | 2963 (18.0)             | 2983 (73.9)             |
| Yes                                       | 16795 (69.3)            | 13454 (82.0)            | 1053 (26.1)             |
| Missing, n                                | 10152                   | 6173                    | 1629                    |
| <b>Trastuzumab, n (%)</b>                 |                         |                         |                         |
| No                                        | 13866 (96.1)            | 8760 (96.3)             | 2548 (92.0)             |
| Yes                                       | 566 (3.9)               | 337 (3.7)               | 221 (8.0)               |

|            |       |       |      |
|------------|-------|-------|------|
| Missing, n | 19969 | 13493 | 2896 |
|------------|-------|-------|------|

Abbreviations: BC = breast cancer; CBC = contralateral breast cancer; IQR = interquartile range; ER = estrogen receptor; PR = progesterone receptor; *ERBB2* = ERB-B2 receptor tyrosine kinase 2. Percentages are given within women with no missing values.

**Table S3. Characteristics of protein-truncating variants carriers in 9 breast cancer genes and pathogenic/likely pathogenic rare missense variants carriers in *BRCA1*, *BRCA2* and *TP53* out of the study sample of 34401 women as specified in Table S2.**

|                                           | <b>ATMPTVs carriers</b> | <b><i>BARD1</i> PTVs carriers</b> | <b><i>BRCA1</i> carriers (PTVs + P/LP MSVs)</b> | <b><i>BRCA2</i> carriers (PTVs + P/LP MSVs)</b> | <b><i>CHEK2</i> PTVs carriers</b> | <b><i>PALB2</i> PTVs carriers</b> | <b><i>RAD51C</i> PTVs carriers</b> | <b><i>RAD51D</i> PTVs carriers</b> | <b><i>TP53</i> carriers (PTVs + P/LP MSVs)</b> |
|-------------------------------------------|-------------------------|-----------------------------------|-------------------------------------------------|-------------------------------------------------|-----------------------------------|-----------------------------------|------------------------------------|------------------------------------|------------------------------------------------|
| Women, n                                  | 250                     | 54                                | 364                                             | 487                                             | 699                               | 224                               | 40                                 | 31                                 | 47                                             |
| All-cause deaths, n                       | 56                      | 14                                | 88                                              | 129                                             | 163                               | 56                                | 8                                  | 9                                  | 18                                             |
| Breast cancer-specific deaths, n          | 28                      | 5                                 | 43                                              | 77                                              | 100                               | 35                                | 3                                  | 6                                  | 8                                              |
| Contralateral breast cancers, n           | 6                       | 2                                 | 21                                              | 20                                              | 39                                | 11                                | 2                                  | 1                                  | 6                                              |
| <b>Age at CBC diagnosis, median (IQR)</b> | 59 (52-65)              | 59 (57-61)                        | 49 (43-54)                                      | 53 (41-57)                                      | 55 (46-70)                        | 57 (49-63)                        | 56 (56-56)                         | 53 (53-53)                         | 37 (30-39)                                     |
| <b>Characteristics of the first BC</b>    |                         |                                   |                                                 |                                                 |                                   |                                   |                                    |                                    |                                                |
| <b>Age at diagnosis, median (IQR)</b>     | 54 (46-62)              | 53(44-60)                         | 45 (38-53)                                      | 50 (42-59)                                      | 53 (44-61)                        | 52 (44-61)                        | 57(49-63)                          | 54 (49-62)                         | 42 (32-57)                                     |
| <b>Year of diagnosis, median (IQR)</b>    | 2003 (1999-2006)        | 2001 (1998-2005)                  | 2002 (1999-2006)                                | 2003 (1999-2006)                                | 2002 (1998-2006)                  | 2002 (2000-2005)                  | 2003 (1999-2006)                   | 2002 (1998-2005)                   | 2002 (1999-2007)                               |
| Missing, n                                | 1                       | 0                                 | 8                                               | 10                                              | 13                                | 4                                 | 1                                  | 0                                  | 0                                              |
| <b>Nodal status, n (%)</b>                |                         |                                   |                                                 |                                                 |                                   |                                   |                                    |                                    |                                                |
| Negative                                  | 115 (56.7)              | 29 (60.4)                         | 188 (62.0)                                      | 200 (52.1)                                      | 340 (56.7)                        | 106 (55.5)                        | 20 (58.8)                          | 12 (50.0)                          | 23 (54.8)                                      |
| Positive                                  | 88 (43.3)               | 19 (39.6)                         | 115 (38.0)                                      | 184 (47.9)                                      | 260 (43.3)                        | 85 (44.5)                         | 14 (41.2)                          | 12 (50.0)                          | 19 (45.2)                                      |
| Missing, n                                | 47                      | 6                                 | 61                                              | 103                                             | 99                                | 33                                | 6                                  | 7                                  | 5                                              |
| <b>Tumor size, n (%)</b>                  |                         |                                   |                                                 |                                                 |                                   |                                   |                                    |                                    |                                                |
| ≤2cm                                      | 117 (65.0)              | 28 (66.7)                         | 165 (60.0)                                      | 211 (57.7)                                      | 332 (61.5)                        | 100 (56.2)                        | 16 (53.3)                          | 13 (59.1)                          | 19 (65.5)                                      |
| >2cm and ≤5cm                             | 55 (30.6)               | 12 (28.6)                         | 97 (35.3)                                       | 132 (36.1)                                      | 188 (34.8)                        | 71 (39.9)                         | 13 (43.3)                          | 6 (27.3)                           | 8 (27.6)                                       |
| >5cm                                      | 8 (4.4)                 | 2 (4.8)                           | 13 (4.7)                                        | 23 (6.3)                                        | 20 (3.7)                          | 7 (3.9)                           | 1 (3.3)                            | 3 (13.6)                           | 2 (6.9)                                        |
| Missing, n                                | 70                      | 12                                | 89                                              | 121                                             | 159                               | 46                                | 10                                 | 9                                  | 18                                             |
| <b>Tumor grade, n (%)</b>                 |                         |                                   |                                                 |                                                 |                                   |                                   |                                    |                                    |                                                |
| 1                                         | 22 (11.1)               | 8 (17.8)                          | 12 (4.0)                                        | 26 (6.4)                                        | 89 (16.1)                         | 13 (6.8)                          | 8 (23.5)                           | 2 (7.1)                            | 2 (5.3)                                        |
| 2                                         | 90 (45.5)               | 16 (35.6)                         | 65 (21.9)                                       | 192 (47.2)                                      | 312 (56.3)                        | 90 (46.9)                         | 11 (32.4)                          | 9 (32.1)                           | 18 (47.4)                                      |
| 3                                         | 86 (43.4)               | 21 (46.7)                         | 220 (74.1)                                      | 189 (46.4)                                      | 153 (27.6)                        | 89 (46.4)                         | 15 (44.1)                          | 17 (60.7)                          | 18 (47.4)                                      |
| Missing, n                                | 52                      | 9                                 | 67                                              | 80                                              | 145                               | 32                                | 6                                  | 3                                  | 9                                              |
| <b>ER status, n (%)</b>                   |                         |                                   |                                                 |                                                 |                                   |                                   |                                    |                                    |                                                |
| Negative                                  | 23 (12.5)               | 21 (47.7)                         | 218 (71.9)                                      | 99 (25.4)                                       | 76 (13.2)                         | 48 (26.7)                         | 12 (38.7)                          | 11 (47.8)                          | 10 (24.4)                                      |
| Positive                                  | 161 (87.5)              | 23 (52.3)                         | 85 (28.1)                                       | 291 (74.6)                                      | 501 (86.8)                        | 132 (73.3)                        | 19 (61.3)                          | 12 (52.2)                          | 31 (75.6)                                      |
| Missing, n                                | 66                      | 10                                | 61                                              | 97                                              | 122                               | 44                                | 9                                  | 8                                  | 6                                              |
| <b>PR status, n (%)</b>                   |                         |                                   |                                                 |                                                 |                                   |                                   |                                    |                                    |                                                |
| Negative                                  | 38 (24.5)               | 22 (57.9)                         | 218 (79.0)                                      | 136 (41.3)                                      | 127 (25.1)                        | 69 (42.9)                         | 13 (50.0)                          | 10 (55.6)                          | 15 (38.5)                                      |
| Positive                                  | 117 (75.5)              | 16 (42.1)                         | 58 (21.0)                                       | 193 (58.7)                                      | 378 (74.9)                        | 92 (57.1)                         | 13 (50.0)                          | 8 (44.4)                           | 24 (61.5)                                      |
| Missing, n                                | 95                      | 16                                | 88                                              | 158                                             | 194                               | 63                                | 14                                 | 13                                 | 8                                              |
| <b><i>ERBB2</i> status, n (%)</b>         |                         |                                   |                                                 |                                                 |                                   |                                   |                                    |                                    |                                                |
| Negative                                  | 96 (83.5)               | 20 (87.0)                         | 200 (93.5)                                      | 220 (85.3)                                      | 300 (79.4)                        | 94 (79.7)                         | 17 (89.5)                          | 16 (100.0)                         | 17 (60.7)                                      |
| Positive                                  | 19 (16.5)               | 3 (13.0)                          | 14 (6.5)                                        | 38 (14.7)                                       | 78 (20.6)                         | 24 (20.3)                         | 2 (10.5)                           | 0 (0.0)                            | 11 (39.3)                                      |
| Missing, n                                | 135                     | 31                                | 150                                             | 229                                             | 321                               | 106                               | 21                                 | 15                                 | 19                                             |
| <b>Surgery, n (%)</b>                     |                         |                                   |                                                 |                                                 |                                   |                                   |                                    |                                    |                                                |
| No surgery                                | 4 (2.2)                 | 0 (0.0)                           | 9 (3.6)                                         | 13 (3.8)                                        | 10 (1.9)                          | 6 (3.5)                           | 0 (0.0)                            | 1 (3.8)                            | 0 (0.0)                                        |
| Breast saving                             | 54 (30.3)               | 21 (53.8)                         | 76 (30.4)                                       | 88 (25.9)                                       | 178 (33.9)                        | 47 (27.5)                         | 9 (31.0)                           | 6 (23.1)                           | 9 (32.1)                                       |
| Mastectomy (with/without axillary)        | 49 (27.5)               | 9 (23.1)                          | 97 (38.8)                                       | 101 (29.7)                                      | 190 (36.2)                        | 63 (36.8)                         | 10 (34.5)                          | 3 (11.5)                           | 11 (39.3)                                      |

|                                        |            |            |            |            |            |            |            |           |           |
|----------------------------------------|------------|------------|------------|------------|------------|------------|------------|-----------|-----------|
| Type unknown                           | 71 (39.9)  | 9 (23.1)   | 68 (27.2)  | 138 (40.6) | 147 (28.0) | 55 (32.2)  | 10 (34.5)  | 16 (61.5) | 8 (28.6)  |
| Missing, n                             | 72         | 15         | 114        | 147        | 174        | 53         | 11         | 5         | 19        |
| <b>Radiation, n (%)</b>                |            |            |            |            |            |            |            |           |           |
| No radiation                           | 39 (21.8)  | 7 (18.9)   | 67 (26.5)  | 81 (23.4)  | 151 (27.6) | 53 (31.0)  | 8 (25.0)   | 8 (30.8)  | 10 (37.0) |
| Breast                                 | 45 (25.1)  | 17 (45.9)  | 65 (25.7)  | 72 (20.8)  | 173 (31.6) | 48 (28.1)  | 9 (28.1)   | 3 (11.5)  | 9 (33.3)  |
| Breast and lymph nodes                 | 19 (10.6)  | 1 (2.7)    | 14 (5.5)   | 30 (8.7)   | 59 (10.8)  | 19 (11.1)  | 3 (9.4)    | 1 (3.8)   | 1 (3.7)   |
| Lymph nodes only                       | 5 (2.8)    | 1 (2.7)    | 3 (1.2)    | 13 (3.8)   | 7 (1.3)    | 0 (0.0)    | 0 (0.0)    | 0 (0.0)   | 2 (7.4)   |
| Organ unknown                          | 71 (39.7)  | 11 (29.7)  | 104 (41.1) | 150 (43.4) | 157 (28.7) | 51 (29.8)  | 12 (37.5)  | 14 (53.8) | 5 (18.5)  |
| Missing, n                             | 71         | 17         | 111        | 141        | 152        | 53         | 8          | 5         | 20        |
| <b>Neoadjuvant chemotherapy, n (%)</b> |            |            |            |            |            |            |            |           |           |
| No                                     | 152 (89.9) | 35 (100.0) | 201 (83.8) | 270 (87.1) | 397 (90.0) | 132 (94.3) | 24 (82.8)  | 21 (95.5) | 25 (92.6) |
| Yes                                    | 17 (10.1)  | 0 (0.0)    | 39 (16.2)  | 40 (12.9)  | 44 (10.0)  | 8 (5.7)    | 5 (17.2)   | 1 (4.5)   | 2 (7.4)   |
| Missing, n                             | 81         | 19         | 124        | 177        | 258        | 84         | 11         | 9         | 20        |
| <b>Adjuvant chemotherapy, n (%)</b>    |            |            |            |            |            |            |            |           |           |
| No                                     | 101 (56.7) | 19 (54.3)  | 75 (30.1)  | 152 (45.8) | 311 (59)   | 80 (49.1)  | 17 (58.6)  | 15 (60.0) | 11 (42.3) |
| Yes                                    | 77 (43.3)  | 16 (45.7)  | 174 (69.9) | 180 (54.2) | 216 (41.0) | 83 (50.9)  | 12 (41.4)  | 10 (40.0) | 15 (57.7) |
| Missing, n                             | 72         | 19         | 115        | 155        | 172        | 61         | 11         | 6         | 21        |
| <b>Endocrine therapy, n (%)</b>        |            |            |            |            |            |            |            |           |           |
| No                                     | 51 (29.0)  | 18 (48.6)  | 164 (66.7) | 106 (32.1) | 178 (33.5) | 59 (35.5)  | 12 (40.0)  | 15 (57.7) | 7 (26.9)  |
| Yes                                    | 125 (71.0) | 19 (51.4)  | 82 (33.3)  | 224 (67.9) | 353 (66.5) | 107 (64.5) | 18 (60.0)  | 11 (42.3) | 19 (73.1) |
| Missing, n                             | 74         | 17         | 118        | 157        | 168        | 58         | 10         | 5         | 21        |
| <b>Trastuzumab, n (%)</b>              |            |            |            |            |            |            |            |           |           |
| No                                     | 108 (97.3) | 31 (100.0) | 168 (98.8) | 193 (98.0) | 319 (94.4) | 87 (92.6)  | 17 (100.0) | 9 (100.0) | 19 (82.6) |
| Yes                                    | 3 (2.7)    | 0 (0.0)    | 2 (1.2)    | 4 (2.0)    | 19 (5.6)   | 7 (7.4)    | 0 (0.0)    | 0 (0.0)   | 4 (17.4)  |
| Missing, n                             | 139        | 23         | 194        | 290        | 361        | 130        | 23         | 22        | 24        |

Abbreviations: BC= breast cancer; IQR = interquartile range; CBC = contralateral breast cancer; ER = estrogen receptor; PR = progesterone receptor; *ERBB2* = ERB-B2 receptor tyrosine kinase 2; PTVs = protein-truncating variants; P/LP = pathogenic/likely pathogenic; MSVs = missense variants. Percentages are given within women with no missing values.

**Table S4. Characteristics of the study sample and breast tumors, overall and by ER status of the first breast cancer, including women who developed a contralateral breast cancer before study entry or within 3 months after date of first breast cancer diagnosis.**

|                                           | All          | ER-positive first BC | ER-negative first BC |
|-------------------------------------------|--------------|----------------------|----------------------|
| Number of women                           | 35232        | 23098                | 5759                 |
| Number of all-cause deaths                | 7114         | 4326                 | 1490                 |
| Number of breast cancer-specific deaths   | 3556         | 2053                 | 852                  |
| Number of contralateral breast cancers    | 1523         | 941                  | 233                  |
| <b>Age at CBC diagnosis, median (IQR)</b> | 59 (50-68)   | 59 (51-68)           | 55 (46-66)           |
| Missing, n                                | 74           | 63                   | 6                    |
| <b>Characteristics of the first BC</b>    |              |                      |                      |
| <b>Age at diagnosis, median (IQR)</b>     | 56 (48-64)   | 57 (49-65)           | 54 (45-62)           |
| <b>Year of diagnosis, median (IQR)</b>    | 2003 (1999-) | 2003 (2000-2006)     | 2002 (1999-2005)     |
| Missing, n                                | 468          | 322                  | 93                   |
| <b>Nodal status, n (%)</b>                |              |                      |                      |
| Negative                                  | 18704 (63.6) | 13324 (63.6)         | 3111 (60.3)          |
| Positive                                  | 10696 (36.4) | 7611 (36.4)          | 2044 (39.7)          |
| Missing, n                                | 5832         | 2163                 | 604                  |
| <b>Tumor size, n (%)</b>                  |              |                      |                      |
| ≤2cm                                      | 17645 (65.4) | 12900 (67.4)         | 2438 (53.0)          |
| >2cm and ≤5cm                             | 8443 (31.3)  | 5675 (29.7)          | 1923 (41.8)          |
| >5cm                                      | 896 (3.3)    | 553 (2.9)            | 238 (5.2)            |
| Missing, n                                | 8248         | 3970                 | 1160                 |
| <b>Tumor grade, n (%)</b>                 |              |                      |                      |
| 1                                         | 5825 (20.3)  | 4880 (23.8)          | 238 (4.7)            |
| 2                                         | 14239 (49.5) | 11266 (55.0)         | 1438 (28.5)          |
| 3                                         | 8693 (30.2)  | 4335 (21.2)          | 3363 (66.7)          |
| Missing, n                                | 6475         | 2617                 | 720                  |
| <b>ER status, n (%)</b>                   |              |                      |                      |
| Negative                                  | 5759 (20.0)  | -                    | 5759 (100.0)         |
| Positive                                  | 23098 (80.0) | 23098 (100.0)        | -                    |
| Missing, n                                | 6375         | -                    | -                    |
| <b>PR status, n (%)</b>                   |              |                      |                      |
| Negative                                  | 8032 (32.5)  | 3564 (18.3)          | 4441 (85.9)          |
| Positive                                  | 16659 (67.5) | 15899 (81.7)         | 729 (14.1)           |
| Missing, n                                | 10541        | 3635                 | 589                  |
| <b>ERBB2 status, n (%)</b>                |              |                      |                      |
| Negative                                  | 15541 (82.7) | 12774 (86.0)         | 2632 (69.8)          |
| Positive                                  | 3251 (17.3)  | 2087 (14.0)          | 1141 (30.2)          |
| Missing, n                                | 16440        | 8237                 | 1986                 |
| <b>Surgery, n (%)</b>                     |              |                      |                      |
| No surgery                                | 560 (2.2)    | 194 (1.2)            | 49 (1.1)             |
| Breast saving                             | 8594 (34.3)  | 6490 (38.8)          | 1548 (35.8)          |
| Mastectomy (with or without axillary)     | 6722 (26.8)  | 4374 (26.1)          | 1512 (35.0)          |
| Type unknown                              | 9181 (36.6)  | 5678 (33.9)          | 1212 (28.0)          |
| Missing, n                                | 10175        | 6362                 | 1438                 |
| <b>Radiation, n (%)</b>                   |              |                      |                      |
| No radiation                              | 6756 (26.5)  | 4067 (23.8)          | 1110 (25.8)          |
| Breast                                    | 7205 (28.3)  | 5457 (31.9)          | 1251 (29.1)          |
| Breast and lymph nodes                    | 2081 (8.2)   | 1495 (8.7)           | 487 (11.3)           |
| Lymph nodes only                          | 324 (1.3)    | 260 (1.5)            | 52 (1.2)             |
| Organ unknown                             | 9115 (35.8)  | 5830 (34.1)          | 1399 (32.5)          |
| Missing, n                                | 9751         | 5989                 | 1460                 |
| <b>Neoadjuvant chemotherapy, n (%)</b>    |              |                      |                      |
| No                                        | 20517 (93.9) | 13772 (94.9)         | 3396 (89.1)          |
| Yes                                       | 1332 (6.1)   | 733 (5.1)            | 414 (10.9)           |
| Missing, n                                | 13383        | 8593                 | 1949                 |
| <b>Adjuvant chemotherapy, n (%)</b>       |              |                      |                      |
| No                                        | 15178 (61.9) | 10730 (65.0)         | 1522 (36.2)          |
| Yes                                       | 9327 (38.1)  | 5770 (35.0)          | 2680 (63.8)          |
| Missing, n                                | 10727        | 6598                 | 1557                 |
| <b>Endocrine therapy, n (%)</b>           |              |                      |                      |
| No                                        | 7714 (31.0)  | 3071 (18.3)          | 3029 (73.6)          |
| Yes                                       | 17156 (69.0) | 13742 (81.7)         | 1088 (26.4)          |
| Missing, n                                | 10362        | 6285                 | 1642                 |
| <b>Trastuzumab, n (%)</b>                 |              |                      |                      |



|            |              |             |             |
|------------|--------------|-------------|-------------|
| No         | 14342 (96.1) | 9010 (96.3) | 2606 (92.1) |
| Yes        | 578 (3.9)    | 346 (3.7)   | 224 (7.9)   |
| Missing, n | 20312        | 13742       | 2929        |

Abbreviations: BC = breast cancer; IQR = interquartile range; CBC = contralateral breast cancer; ER = estrogen receptor; PR = progesterone receptor; *ERBB2* = ERB-B2 receptor tyrosine kinase 2.  
Percentages are given within women with no missing values.

**Table S5. Overview of the variables included for multiple imputation with the R package MICE.**

| Variable                       | Missing data percentage <sup>a</sup> | Pre-processing performed before imputation                                                                          | Imputation method        |
|--------------------------------|--------------------------------------|---------------------------------------------------------------------------------------------------------------------|--------------------------|
| Time to CBC                    | 0.1                                  | If CBC status missing, then set to time to last follow-up                                                           | Predictive mean matching |
| Year of diagnosis              | 1.3                                  |                                                                                                                     | Predictive mean matching |
| Morphology group of the tumor  | 6.3                                  |                                                                                                                     | Polytomous regression    |
| CBC status <sup>b</sup>        | 10.5                                 |                                                                                                                     | Predictive mean matching |
| Lymph node status              | 16.6                                 |                                                                                                                     | Logistic regression      |
| ER status                      | 18.1                                 |                                                                                                                     | Logistic regression      |
| Histopathological grade        | 18.4                                 |                                                                                                                     | Polytomous regression    |
| Number of positive lymph nodes | 22.0                                 |                                                                                                                     | Predictive mean matching |
| Size category of the tumor     | 23.4                                 |                                                                                                                     | Polytomous regression    |
| Tumor stage                    | 26.2                                 |                                                                                                                     | Polytomous regression    |
| Radiation                      | 27.7                                 |                                                                                                                     | Polytomous regression    |
| Surgery                        | 28.9                                 |                                                                                                                     | Polytomous regression    |
| Adjuvant ET                    | 29.4                                 |                                                                                                                     | Logistic regression      |
| PR status                      | 29.9                                 |                                                                                                                     | Logistic regression      |
| Tumor size in mm               | 30.0                                 |                                                                                                                     | Predictive mean matching |
| Adjuvant CT                    | 30.4                                 |                                                                                                                     | Logistic regression      |
| Neoadjuvant CT                 | 38.0                                 |                                                                                                                     | Logistic regression      |
| Anthracyclines (neoadjuvant)   | 40.0                                 |                                                                                                                     | Logistic regression      |
| Taxanes (neoadjuvant)          | 40.0                                 |                                                                                                                     | Logistic regression      |
| CMF-like CT (neoadjuvant)      | 40.0                                 |                                                                                                                     | Logistic regression      |
| Anthracyclines (adjuvant)      | 40.9                                 |                                                                                                                     | Logistic regression      |
| CMF-like CT (adjuvant)         | 40.9                                 |                                                                                                                     | Logistic regression      |
| Taxanes (adjuvant)             | 41.2                                 |                                                                                                                     | Logistic regression      |
| Aromatase inhibitor            | 41.5                                 |                                                                                                                     | Logistic regression      |
| Tamoxifen                      | 41.5                                 |                                                                                                                     | Logistic regression      |
| <i>ERBB2</i> status            | 46.7                                 |                                                                                                                     | Logistic regression      |
| Trastuzumab                    | 57.7                                 | If missing and corresponding value of Year of diagnosis observed and < 1998, then set equal to 0 (=no trastuzumab). | Logistic regression      |
| Distant metastases status      | 58.6                                 |                                                                                                                     | Logistic regression      |

Abbreviations: CBC = contralateral breast cancer; ER = estrogen receptor; PR = progesterone receptor; *ERBB2* = ERB-B2 receptor tyrosine kinase 2; CT = chemotherapy; ET = endocrine therapy; CMF = Cyclophosphamide Methotrexate Fluorouracil.

<sup>a</sup> Based on the total number of women included in the imputation process (N=35232) as specified in Table S4.

<sup>b</sup> Event indicator for CBC.

The Nelson-Aalen estimator of the baseline cumulative hazard and the event indicator of breast cancer-specific survival and overall survival were included in all imputation models to improve imputation, as well as the time to contralateral breast cancer and the corresponding event indicator.

**Table S6. Number of contralateral breast cancers from all studies and corresponding percentages of protein-truncating variants carriers in 9 breast cancer genes and pathogenic/likely pathogenic rare missense variants carriers in *BRCA1*, *BRCA2* and *TP53*, overall and by subgroups based on age.**

| Selection                                                                                                                                                                                                                                                                     | Total number of CBCs, n | Carriers in 9 BC genes, n (PTVs + P/LP MSVs,% ) | <i>ATM</i> PTVs carriers, n (%) | <i>BARD1</i> PTVs carriers, n (%) | <i>BRCA1</i> carriers, n (PTVs + P/LP MSVs, %) | <i>BRCA2</i> carriers, n (PTVs + P/LP MSVs, %) | <i>CHEK2</i> PTVs carriers, n (%) | <i>PALB2</i> PTVs carriers, n (%) | <i>RAD51C</i> PTVs carriers, n (%) | <i>RAD51D</i> PTVs carriers, n (%) | <i>TP53</i> carriers, n (PTVs + P/LP MSVs, %) |
|-------------------------------------------------------------------------------------------------------------------------------------------------------------------------------------------------------------------------------------------------------------------------------|-------------------------|-------------------------------------------------|---------------------------------|-----------------------------------|------------------------------------------------|------------------------------------------------|-----------------------------------|-----------------------------------|------------------------------------|------------------------------------|-----------------------------------------------|
| <b>Numbers and percentages of CBCs from the sample of 35232 women used for multiple imputation (as in Table S4), including women with unknown time to CBC and women who developed a CBC before study entry or within 3 months after date of first breast cancer diagnosis</b> |                         |                                                 |                                 |                                   |                                                |                                                |                                   |                                   |                                    |                                    |                                               |
| All CBCs <sup>a</sup>                                                                                                                                                                                                                                                         | 1523                    | 189 (12.4)                                      | 12 (0.8)                        | 5 (0.3)                           | 32 (2.1)                                       | 44 (2.9)                                       | 69 (4.5)                          | 18 (1.2)                          | 4 (0.3)                            | 2 (0.1)                            | 11 (0.7)                                      |
| CBCs diagnosed at age < 50 years                                                                                                                                                                                                                                              | 344                     | 74 (21.5)                                       | 4 (1.2)                         | 0 (0.0)                           | 19 (5.5)                                       | 19 (5.5)                                       | 23 (6.7)                          | 3 (0.9)                           | 1 (0.3)                            | 0 (0.0)                            | 9 (2.6)                                       |
| CBCs diagnosed at age ≥ 50 years                                                                                                                                                                                                                                              | 1105                    | 111 (10.0)                                      | 8 (0.7)                         | 5 (0.5)                           | 13 (1.2)                                       | 23 (2.1)                                       | 44 (4.0)                          | 15 (1.4)                          | 3 (0.3)                            | 2 (0.2)                            | 2 (0.2)                                       |
| Missing age at diagnosis of CBC                                                                                                                                                                                                                                               | 74                      | 4 (5.4)                                         | 0 (0.0)                         | 0 (0.0)                           | 0 (0.0)                                        | 2 (2.7)                                        | 2 (2.7)                           | 0 (0.0)                           | 0 (0.0)                            | 0 (0.0)                            | 0 (0.0)                                       |
| <b>Numbers and percentages of CBCs from the sample of 30628 women included in the CBC risk analyses, excluding women with unknown time to CBC and women who developed a CBC before study entry or within 3 months after date of first breast cancer diagnosis</b>             |                         |                                                 |                                 |                                   |                                                |                                                |                                   |                                   |                                    |                                    |                                               |
| All CBCs <sup>b</sup>                                                                                                                                                                                                                                                         | 676                     | 103 (15.2)                                      | 6 (0.9)                         | 2 (0.3)                           | 21 (3.1)                                       | 20 (3.0)                                       | 38 (5.6)                          | 11 (1.6)                          | 2 (0.3)                            | 1 (0.1)                            | 5 (0.7)                                       |
| CBCs diagnosed at age < 50 years                                                                                                                                                                                                                                              | 127                     | 40 (31.5)                                       | 0 (0.0)                         | 0 (0.0)                           | 11 (8.7)                                       | 9 (7.1)                                        | 14 (11.0)                         | 3 (2.4)                           | 0 (0.0)                            | 0 (0.0)                            | 5 (3.9)                                       |
| CBCs diagnosed at age ≥ 50 years                                                                                                                                                                                                                                              | 549                     | 63 (11.5)                                       | 6 (1.1)                         | 2 (0.4)                           | 10 (1.8)                                       | 11 (2.0)                                       | 24 (4.4)                          | 8 (1.5)                           | 2 (0.4)                            | 1 (0.2)                            | 0 (0.0)                                       |

Abbreviations: BC = breast cancer; CBC = contralateral breast cancer; PTVs = protein-truncating variants; P/LP = pathogenic/likely pathogenic; MSVs = missense variants.

In each row, percentages corresponding to separate genes do not exactly sum up to the percentage of carriers in any of the 9 BC genes due to the fact that some women carry mutations in more than one gene.

<sup>a</sup> All considered including invasive (68.7), in-situ (11.0), and missing behavior (20.4).

<sup>b</sup> All considered including invasive (70.7), in-situ (10.9), and missing behavior (18.3).

**Table S7. Association of protein-truncating variants in 9 breast cancer genes and of pathogenic/likely pathogenic rare missense variants in *BRCA1*, *BRCA2* and *TP53* with risk of contralateral breast cancer in women diagnosed with ER-positive first breast cancer.**

| Gene                              | Unadjusted analyses       |                | Adjusted analyses <sup>a</sup> |                | No. of women |          | No. of CBC   |          |
|-----------------------------------|---------------------------|----------------|--------------------------------|----------------|--------------|----------|--------------|----------|
|                                   | HR (95%CI)                | P              | HR (95%CI)                     | P              | Non-carriers | Carriers | Non-carriers | Carriers |
| PTVs (unless indicated otherwise) |                           |                |                                |                |              |          |              |          |
| <i>ATM</i>                        | 1.22 (0.44-3.39)          | 7.0E-01        | 1.25 (0.45-3.52)               | 6.7E-01        | 19733        | 144      | 414          | 4        |
| <i>BARD1</i>                      | NA                        | NA             | NA                             | NA             | 19854        | 23       | 418          | 0        |
| <i>BRCA1</i> <sup>b</sup>         | 1.53 (0.34-6.76)          | 5.8E-01        | 1.62 (0.36-7.31)               | 5.3E-01        | 19800        | 77       | 416          | 2        |
| <i>BRCA2</i> <sup>b</sup>         | <b>2.66 (1.40-5.04)</b>   | <b>2.7E-03</b> | <b>2.66 (1.40-5.09)</b>        | <b>3.1E-03</b> | 19634        | 243      | 405          | 13       |
| <i>CHEK2</i>                      | <b>2.11 (1.35-3.29)</b>   | <b>1.0E-03</b> | <b>2.06 (1.31-3.22)</b>        | <b>1.7E-03</b> | 19412        | 465      | 392          | 26       |
| c.1100delC                        | <b>2.48 (1.56-3.94)</b>   | <b>1.3E-04</b> | <b>2.45 (1.53-3.91)</b>        | <b>1.9E-04</b> | 19412        | 384      | 392          | 25       |
| Other                             | 0.45 (0.08-2.48)          | 3.6E-01        | 0.41 (0.08-2.24)               | 3.0E-01        | 19412        | 81       | 392          | 1        |
| <i>PALB2</i>                      | 2.49 (0.97-6.35)          | 5.7E-02        | 2.57 (0.99-6.64)               | 5.2E-02        | 19761        | 116      | 412          | 6        |
| <i>RAD51C</i>                     | NA                        | NA             | NA                             | NA             | 19859        | 18       | 418          | 0        |
| <i>RAD51D</i>                     | NA                        | NA             | NA                             | NA             | 19866        | 11       | 418          | 0        |
| <i>TP53</i> <sup>b</sup>          | <b>10.33 (2.66-40.12)</b> | <b>7.4E-04</b> | <b>10.74 (2.72-42.38)</b>      | <b>7.4E-04</b> | 19851        | 26       | 414          | 4        |

Abbreviations: No. = number; CBC = contralateral breast cancer; PTVs = protein-truncating variants; HR = hazard ratio; CI = confidence interval; P = p-value.

Analyses included women from 32 studies with information about contralateral breast cancer diagnosis. Statistically significant associations ( $P < 5E-02$ ) are highlighted in bold. NA: not assessable due to absence of mutation carriers with events.

<sup>a</sup> Adjusted analyses were performed by including age at diagnosis, nodal status, size category, grade, ERB-B2 receptor tyrosine kinase 2 (*ERBB2*) status of the first breast cancer, (neo)adjuvant chemotherapy, endocrine therapy and trastuzumab as covariates in the Cox regression model.

<sup>b</sup> Combined PTVs and rare pathogenic/likely pathogenic missense variants as defined in Dorling et al. (NEJM 2021).

**Table S8. Association of protein-truncating variants in 9 breast cancer genes and of pathogenic/likely pathogenic rare missense variants in *BRCA1*, *BRCA2* and *TP53* with risk of contralateral breast cancer in women diagnosed with ER-negative first breast cancer.**

| Gene                              | Unadjusted analyses      |                | Adjusted analyses <sup>a</sup> |                | No. of women |          | No of CBC    |          |
|-----------------------------------|--------------------------|----------------|--------------------------------|----------------|--------------|----------|--------------|----------|
|                                   | HR (95%CI)               | P              | HR (95%CI)                     | P              | Non-carriers | Carriers | Non-carriers | Carriers |
| PTVs (unless indicated otherwise) |                          |                |                                |                |              |          |              |          |
| <i>ATM</i>                        | NA                       | NA             | NA                             | NA             | 5016         | 22       | 139          | 0        |
| <i>BARD1</i>                      | 2.01 (0.22-18.18)        | 5.3E-01        | 1.76 (0.20-15.72)              | 6.1E-01        | 5020         | 18       | 138          | 1        |
| <i>BRCA1</i> <sup>b</sup>         | <b>2.96 (1.62-5.43)</b>  | <b>4.4E-04</b> | <b>2.98 (1.58-5.63)</b>        | <b>9.3E-04</b> | 4844         | 194      | 123          | 16       |
| <i>BRCA2</i> <sup>b</sup>         | 1.26 (0.38-4.13)         | 7.1E-01        | 1.19 (0.36-3.94)               | 7.E-01         | 4951         | 87       | 136          | 3        |
| <i>CHEK2</i>                      | 2.48 (0.96-6.36)         | 5.9E-02        | 2.50 (0.95-6.57)               | 6.3E-02        | 4965         | 73       | 133          | 6        |
| c.1100delC                        | 1.37 (0.41-4.63)         | 6.1E-01        | 1.36 (0.39-4.69)               | 6.2E-01        | 4965         | 54       | 133          | 3        |
| Other                             | <b>10.44(2.16-50.50)</b> | <b>3.5E-03</b> | <b>11.9 (2.32-61.19)</b>       | <b>3.3E-03</b> | 4965         | 19       | 133          | 3        |
| <i>PALB2</i>                      | 2.55 (0.68 - 9.56)       | 1.6E-01        | 2.69 (0.70-10.37)              | 1.5E-01        | 4995         | 43       | 136          | 3        |
| <i>RAD51C</i>                     | 2.35 (0.25-22.25)        | 4.6E-01        | 2.31 (0.24-22.62)              | 4.7E-01        | 5027         | 11       | 138          | 1        |
| <i>RAD51D</i>                     | 2.44 (0.25-24.01)        | 4.5E-01        | 1.87 (0.20-17.56)              | 5.8E-01        | 5027         | 11       | 138          | 1        |
| <i>TP53</i> <sup>b</sup>          | 4.87 (0.41-58.18)        | 2.1E-01        | 4.75 (0.38-58.74)              | 2.2E-01        | 5029         | 9        | 138          | 1        |

Abbreviations: No. = number; CBC = contralateral breast cancer; PTVs = protein-truncating variants; HR = hazard ratio; CI = confidence interval; P = p-value.

Analyses included women from 32 studies with information about contralateral breast cancer diagnosis. Statistically significant associations ( $P < 5E-02$ ) are highlighted in bold. NA: not assessable due to absence of mutation carriers with events.

<sup>a</sup> Adjusted analyses were performed by including age at diagnosis, nodal status, size category, grade, ERB-B2 receptor tyrosine kinase 2 (*ERBB2*) status of the first breast cancer, (neo)adjuvant chemotherapy, endocrine therapy and trastuzumab as covariates in the Cox regression model.

<sup>b</sup> Combined PTVs and rare pathogenic/likely pathogenic missense variants as defined in Dorling et al. (NEJM 2021).

**Table S9. Heterogeneity test for the association of protein-truncating variants in 9 breast cancer genes and of pathogenic/likely pathogenic rare missense variants in *BRCA1*, *BRCA2* and *TP53* with contralateral breast cancer risk and breast cancer-specific survival, by ER status of the first breast cancer.**

| Gene                              | Contralateral breast cancer risk |                | Breast cancer-specific survival |                |
|-----------------------------------|----------------------------------|----------------|---------------------------------|----------------|
|                                   | P                                | P <sup>a</sup> | P                               | P <sup>a</sup> |
| PTVs (unless indicated otherwise) |                                  |                |                                 |                |
| <i>ATM</i>                        | 1.5E-01                          | 9.9E-01        | 4.6E-01                         | 5.4E-01        |
| <i>BARD1</i>                      | 2.5E-01                          | 9.9E-01        | 6.3E-01                         | 2.8E-01        |
| <i>BRCA1</i> <sup>b</sup>         | 2.7E-01                          | 3.7E-01        | <b>8.8E-03</b>                  | <b>1.5E-02</b> |
| <i>BRCA2</i> <sup>b</sup>         | 3.1E-01                          | 3.1E-01        | <b>6.4E-04</b>                  | <b>2.2E-02</b> |
| <i>CHEK2</i>                      | 7.8E-01                          | 7.7E-01        | 4.8E-01                         | 4.6E-01        |
| <i>PALB2</i>                      | 9.5E-01                          | 9.7E-01        | 3.3E-01                         | 7.4E-01        |
| <i>RAD51C</i>                     | NA                               | NA             | NA                              | NA             |
| <i>RAD51D</i>                     | NA                               | NA             | 9.8E-01                         | 8.6E-01        |
| <i>TP53</i> <sup>b</sup>          | 4.6E-01                          | 4.6E-01        | 2.0E-01                         | 5.7E-01        |

Abbreviations: P = p-value; PTVs = protein-truncating variants.

Heterogeneity tests are for the hazard ratio (HR) estimates presented in Tables S7-S8 (contralateral breast cancer risk) and S26-S27 (breast cancer-specific survival) and compare a model including main effects and an interaction term between the mutation carrier status and the ER status of the first breast cancer, with a model without the interaction term. Statistically significant associations (P<5E-02) are highlighted in bold. NA: not assessable within ER-positive and/or ER-negative tumors due to absence of mutation carriers or of mutation carriers with events.

<sup>a</sup> The two models compared additionally include the covariates specified in Tables S7-S8 and S26-S27.

<sup>b</sup> Combined PTVs and rare pathogenic/likely pathogenic missense variants as defined in Dorling et al. (NEJM 2021).

**Table S10. Association of rare missense variants in 9 breast cancer genes with risk of contralateral breast cancer.**

| Gene          | Unadjusted analyses     |                | Adjusted analyses <sup>a</sup> |                | No. of women |          | No. of CBC   |          |
|---------------|-------------------------|----------------|--------------------------------|----------------|--------------|----------|--------------|----------|
|               | HR (95%CI)              | P              | HR (95%CI)                     | P              | Non-carriers | Carriers | Non-carriers | Carriers |
| <i>ATM</i>    | 1.33 (0.97-1.81)        | 7.4E-02        | 1.34 (0.98-1.84)               | 6.2E-02        | 28846        | 1553     | 622          | 48       |
| <i>BARD1</i>  | 0.79 (0.37-1.72)        | 5.6E-01        | 0.80 (0.37-1.73)               | 5.7E-01        | 30226        | 351      | 668          | 6        |
| <i>BRCA1</i>  | 1.44 (0.94-2.19)        | 9.4E-02        | 1.44 (0.94-2.21)               | 9.2E-02        | 29521        | 817      | 631          | 25       |
| <i>BRCA2</i>  | 1.33 (0.98-1.82)        | 6.9E-02        | 1.34 (0.98-1.83)               | 6.7E-02        | 28627        | 1612     | 612          | 47       |
| <i>CHEK2</i>  | <b>1.78 (1.08-2.93)</b> | <b>2.4E-02</b> | <b>1.78 (1.08-2.94)</b>        | <b>2.5E-02</b> | 29420        | 552      | 619          | 19       |
| <i>PALB2</i>  | 0.63 (0.28-1.41)        | 2.6E-01        | 0.63 (0.28-1.43)               | 2.7E-01        | 30025        | 403      | 660          | 5        |
| <i>RAD51C</i> | 0.79 (0.21-3.00)        | 7.3E-01        | 0.78 (0.21-2.98)               | 7.2E-01        | 30468        | 123      | 672          | 2        |
| <i>RAD51D</i> | 1.36 (0.41-4.49)        | 6.1E-01        | 1.43 (0.43-4.77)               | 5.6E-01        | 30498        | 101      | 672          | 3        |
| <i>TP53</i>   | <b>2.40 (1.08-5.32)</b> | <b>3.2E-02</b> | <b>2.54 (1.13-5.69)</b>        | <b>2.4E-02</b> | 30461        | 165      | 668          | 8        |

Abbreviations: No. = number; CBC = contralateral breast cancer; HR = hazard ratio; CI = confidence interval; P = p-value. Analyses included women from 32 studies with information about contralateral breast cancer diagnosis. The analysis for each gene excluded carriers of protein-truncating variants in that gene. Statistically significant associations ( $P < 5E-02$ ) are highlighted in bold.

<sup>a</sup> Adjusted analyses were performed by including age at diagnosis, nodal status, size category, grade, estrogen receptor (ER) status, ERB-B2 receptor tyrosine kinase 2 (*ERBB2*) status of the first breast cancer, (neo)adjuvant chemotherapy, endocrine therapy and trastuzumab as covariates in the Cox regression model.



**Table S11. Association of rare missense variants in 9 breast cancer genes with risk of contralateral breast cancer in women diagnosed with ER-positive first breast cancer.**

| Gene          | Unadjusted analyses |         | Adjusted analyses <sup>a</sup> |         | No. of women |          | No. of CBC   |          |
|---------------|---------------------|---------|--------------------------------|---------|--------------|----------|--------------|----------|
|               | HR (95%CI)          | P       | HR (95%CI)                     | P       | Non-carriers | Carriers | Non-carriers | Carriers |
| <i>ATM</i>    | 1.38 (0.93-2.05)    | 1.1E-01 | 1.40 (0.94-2.08)               | 1.0E-01 | 18721        | 1012     | 385          | 29       |
| <i>BARD1</i>  | 0.64 (0.22-1.84)    | 4.1E-01 | 0.64 (0.22-1.84)               | 4.1E-01 | 19628        | 226      | 415          | 3        |
| <i>BRCA1</i>  | 1.56 (0.93-2.63)    | 9.3E-02 | 1.58 (0.94-2.67)               | 8.6E-02 | 19289        | 521      | 400          | 17       |
| <i>BRCA2</i>  | 1.31 (0.88-1.94)    | 1.8E-01 | 1.32 (0.88-1.96)               | 1.7E-01 | 18637        | 1014     | 377          | 29       |
| <i>CHEK2</i>  | 1.70 (0.88-3.26)    | 1.1E-01 | 1.67 (0.87-3.20)               | 1.2E-01 | 19029        | 383      | 381          | 11       |
| <i>PALB2</i>  | 0.70 (0.28-1.78)    | 4.6E-01 | 0.71 (0.28-1.80)               | 4.6E-01 | 19481        | 280      | 408          | 4        |
| <i>RAD51C</i> | NA                  | NA      | NA                             | NA      | 19788        | 71       | 418          | 0        |
| <i>RAD51D</i> | 1.43 (0.33-6.24)    | 6.4E-01 | 1.54 (0.35-6.88)               | 5.7E-01 | 19802        | 64       | 416          | 2        |
| <i>TP53</i>   | 2.43 (0.88-6.66)    | 8.6E-02 | 2.67 (0.95-7.50)               | 6.1E-02 | 19771        | 106      | 413          | 5        |

Abbreviations: No. = number; CBC = contralateral breast cancer; HR = hazard ratio; CI = confidence interval; P = p-value. Analyses included women from 32 studies with information about contralateral breast cancer diagnosis. The analysis for each gene excluded carriers of protein-truncating variants in that gene. NA: not assessable due to absence of mutation carriers with events.

<sup>a</sup> Adjusted analyses were performed by including age at diagnosis, nodal status, size category, grade, ERB-B2 receptor tyrosine kinase 2 (*ERBB2*) status of the first breast cancer, (neo)adjuvant chemotherapy, endocrine therapy and trastuzumab as covariates in the Cox regression model.

**Table S12. Association of rare missense variants in 9 breast cancer genes with risk of contralateral breast cancer in women diagnosed with ER-negative first breast cancer.**

| Gene          | Unadjusted analyses |         | Adjusted analyses <sup>a</sup> |         | No. of women |          | No. of CBC   |          |
|---------------|---------------------|---------|--------------------------------|---------|--------------|----------|--------------|----------|
|               | HR (95%CI)          | P       | HR (95%CI)                     | P       | Non-carriers | Carriers | Non-carriers | Carriers |
| <i>ATM</i>    | 1.35 (0.71-2.59)    | 3.6E-01 | 1.38 (0.71-2.68)               | 3.3E-01 | 4756         | 260      | 127          | 12       |
| <i>BARD1</i>  | 0.57 (0.10-3.44)    | 5.4E-01 | 0.55 (0.09-3.33)               | 5.1E-01 | 4954         | 66       | 137          | 1        |
| <i>BRCA1</i>  | 1.50 (0.62-3.62)    | 3.6E-01 | 1.51 (0.62-3.72)               | 3.6E-01 | 4712         | 156      | 117          | 6        |
| <i>BRCA2</i>  | 1.30 (0.66-2.54)    | 4.4E-01 | 1.28 (0.65-2.52)               | 4.8E-01 | 4663         | 293      | 127          | 10       |
| <i>CHEK2</i>  | 1.12 (0.27-4.76)    | 8.7E-01 | 1.13 (0.25-5.01)               | 8.7E-01 | 4907         | 58       | 131          | 2        |
| <i>PALB2</i>  | 0.82 (0.12-5.51)    | 8.4E-01 | 0.86 (0.12-6.06)               | 8.8E-01 | 4937         | 58       | 135          | 1        |
| <i>RAD51C</i> | 1.16 (0.15-9.24)    | 8.9E-01 | 1.08 (0.13-8.66)               | 9.4E-01 | 4999         | 28       | 137          | 1        |
| <i>RAD51D</i> | 1.90 (0.21-16.86)   | 5.7E-01 | 1.65 (0.19-14.62)              | 6.5E-01 | 5007         | 20       | 137          | 1        |
| <i>TP53</i>   | 1.96 (0.41-9.27)    | 4.0E-01 | 2.01 (0.41-9.79)               | 3.9E-01 | 5003         | 33       | 137          | 2        |

Abbreviations: No. = number; CBC = contralateral breast cancer; HR = hazard ratio; CI = confidence interval; P = p-value. Analyses included women from 32 studies with information about contralateral breast cancer diagnosis. The analysis for each gene excluded carriers of protein-truncating variants in that gene.

<sup>a</sup> Adjusted analyses were performed by including age at diagnosis, nodal status, size category, grade, ERB-B2 receptor tyrosine kinase 2 (*ERBB2*) status of the first breast cancer, (neo)adjuvant chemotherapy, endocrine therapy and trastuzumab as covariates in the Cox regression model.

**Table S13. Heterogeneity test for the association of rare missense variants in 9 breast cancer genes with contralateral breast cancer risk and breast cancer-specific survival, by ER status of the first breast cancer.**

| Gene          | Contralateral breast cancer risk |                | Breast cancer-specific survival |                |
|---------------|----------------------------------|----------------|---------------------------------|----------------|
|               | P                                | P <sup>a</sup> | P                               | P <sup>a</sup> |
| <i>ATM</i>    | 9.9E-01                          | 9.8E-01        | 3.8E-01                         | 4.5E-01        |
| <i>BARD1</i>  | 8.4E-01                          | 8.7E-01        | 3.9E-01                         | 5.4E-01        |
| <i>BRCA1</i>  | 9.1E-01                          | 9.3E-01        | 5.8E-01                         | 6.2E-01        |
| <i>BRCA2</i>  | 9.2E-01                          | 8.8E-01        | 4.8E-01                         | 7.3E-01        |
| <i>CHEK2</i>  | 6.2E-01                          | 6.5E-01        | 3.4E-01                         | 3.3E-01        |
| <i>PALB2</i>  | 8.7E-01                          | 8.6E-01        | 5.2E-01                         | 4.9E-01        |
| <i>RAD51C</i> | NA                               | NA             | 8.9E-01                         | 8.0E-01        |
| <i>RAD51D</i> | 8.8E-01                          | 8.6E-01        | 6.1E-01                         | 7.7E-01        |
| <i>TP53</i>   | 8.5E-01                          | 7.5E-01        | 1.2E-01                         | 4.6E-01        |

Abbreviation: P = p-value.

Heterogeneity tests are for the hazard ratio (HR) estimates presented in Tables S11-S12 (contralateral breast cancer risk) and S29-S30 (breast cancer-specific survival) and compare a model including main effects and an interaction term between the mutation carrier status and the ER status of the first breast cancer, with a model without the interaction term. NA: not assessable within ER-positive and/or ER-negative tumors due to absence of mutation carriers or of mutation carriers with events.

<sup>a</sup> The two model compared additionally include the covariates specified in Tables S11-S12 and S29-S30.

**Table S14. Sensitivity analyses for the association of protein-truncating variants and of pathogenic/likely pathogenic rare missense variants in *BRCA1*, *BRCA2* and *TP53* in 9 breast cancer genes with risk of contralateral breast cancer, with the set of non-carriers restricted to women who do not carry protein-truncating variants in any of the 9 breast cancer genes nor pathogenic/likely pathogenic rare missense variants in *BRCA1*, *BRCA2* and *TP53*.**

| Gene                              | Unadjusted analyses      |                | Adjusted analyses <sup>a</sup> |                | No. of women |          | No. of CBC   |          |
|-----------------------------------|--------------------------|----------------|--------------------------------|----------------|--------------|----------|--------------|----------|
|                                   | HR (95%CI)               | P              | HR (95%CI)                     | P              | Non-carriers | Carriers | Non-carriers | Carriers |
| PTVs (unless indicated otherwise) |                          |                |                                |                |              |          |              |          |
| <i>ATM</i>                        | 1.12 (0.46-2.75)         | 8.1E-01        | 1.17 (0.47-2.92)               | 7.3E-01        | 28668        | 221      | 573          | 5        |
| <i>BARD1</i>                      | 1.16 (0.16-8.68)         | 8.8E-01        | 1.13 (0.15-8.44)               | 9.0E-01        | 28668        | 47       | 573          | 1        |
| <i>BRCA1</i> <sup>b</sup>         | <b>3.04 (1.80-5.15)</b>  | <b>3.4E-05</b> | <b>3.21 (1.86-5.54)</b>        | <b>3.3E-05</b> | 28668        | 321      | 573          | 20       |
| <i>BRCA2</i> <sup>b</sup>         | <b>2.56 (1.54-4.28)</b>  | <b>3.2E-04</b> | <b>2.71 (1.61-4.56)</b>        | <b>1.9E-04</b> | 28668        | 409      | 573          | 20       |
| <i>CHEK2</i>                      | <b>2.36 (1.61-3.47)</b>  | <b>1.1E-05</b> | <b>2.35 (1.59-3.45)</b>        | <b>1.7E-05</b> | 28668        | 632      | 573          | 36       |
| c.1100delC                        | <b>2.51 (1.67-3.79)</b>  | <b>1.0E-05</b> | <b>2.50 (1.65-3.77)</b>        | <b>1.6E-05</b> | 28668        | 512      | 573          | 32       |
| Other                             | 1.60 (0.56-4.64)         | 3.8E-01        | 1.57 (0.54-4.53)               | 4.1E-01        | 28668        | 120      | 573          | 4        |
| <i>PALB2</i>                      | <b>2.94 (1.46-5.93)</b>  | <b>2.6E-03</b> | <b>3.10 (1.52-6.30)</b>        | <b>1.9E-03</b> | 28668        | 199      | 573          | 11       |
| <i>RAD51C</i>                     | 2.84 (0.56-14.48)        | 2.1E-01        | 2.80 (0.55-14.33)              | 2.2E-01        | 28668        | 33       | 573          | 2        |
| <i>RAD51D</i>                     | 1.91 (0.22-16.83)        | 5.6E-01        | 1.84 (0.21-16.19)              | 5.8E-01        | 28668        | 27       | 573          | 1        |
| <i>TP53</i> <sup>b</sup>          | <b>7.63 (2.06-28.25)</b> | <b>2.3E-03</b> | <b>8.52 (2.25-32.28)</b>       | <b>1.7E-03</b> | 28668        | 38       | 573          | 4        |

Abbreviations: No. = number; CBC = contralateral breast cancer; PTVs = protein-truncating variants HR = hazard ratio; CI = confidence interval; P = p-value.

Analyses included women from 32 studies with information about contralateral breast cancer diagnosis. Statistically significant associations ( $P < 5E-02$ ) are highlighted in bold. NA: not assessable due to absence of mutation carriers with events.

<sup>a</sup> Adjusted analyses were performed by including age at diagnosis, nodal status, size category, grade, estrogen receptor (ER) status, ERB-B2 receptor tyrosine kinase 2 (*ERBB2*) status of the first breast cancer, (neo)adjuvant chemotherapy, endocrine therapy and trastuzumab as covariates in the Cox regression model.

<sup>b</sup> Combined PTVs and rare pathogenic/likely pathogenic missense variants as defined in Dorling et al. (NEJM 2021).

**Table S15. Sensitivity analysis for the association of rare missense variants in 9 breast cancer genes with risk of contralateral breast cancer, with the set of non-carriers restricted to women who do not carry protein-truncating variants in any of the 9 breast cancer genes nor pathogenic/likely pathogenic rare missense variants in *BRCA1*, *BRCA2* and *TP53*.**

| Gene          | Unadjusted analyses     |                | Adjusted analyses <sup>a</sup> |                | No. of women |          | No. of CBC   |          |
|---------------|-------------------------|----------------|--------------------------------|----------------|--------------|----------|--------------|----------|
|               | HR (95%CI)              | P              | HR (95%CI)                     | P              | Non-carriers | Carriers | Non-carriers | Carriers |
| <i>ATM</i>    | 1.37 (0.99-1.91)        | 6.1E-02        | 1.39 (1.00-1.94)               | 5.2E-02        | 27198        | 1470     | 530          | 43       |
| <i>BARD1</i>  | 0.75 (0.32-1.74)        | 5.1E-01        | 0.76 (0.33-1.76)               | 5.2E-01        | 28338        | 330      | 568          | 5        |
| <i>BRCA1</i>  | 1.43 (0.90-2.28)        | 1.3E-01        | 1.44 (0.91-2.30)               | 1.2E-01        | 27928        | 740      | 552          | 21       |
| <i>BRCA2</i>  | 1.24 (0.89-1.75)        | 2.1E-01        | 1.26 (0.89-1.77)               | 1.9E-01        | 27157        | 1511     | 535          | 38       |
| <i>CHEK2</i>  | <b>1.71 (1.01-2.90)</b> | <b>4.4E-02</b> | <b>1.73 (1.02-2.93)</b>        | <b>4.3E-02</b> | 28132        | 536      | 556          | 17       |
| <i>PALB2</i>  | <b>0.29 (0.10-0.87)</b> | <b>2.8E-02</b> | <b>0.29 (0.10-0.88)</b>        | <b>2.9E-02</b> | 28291        | 377      | 571          | 2        |
| <i>RAD51C</i> | 0.93 (0.23-3.66)        | 9.1E-01        | 0.92 (0.23-3.65)               | 9.1E-01        | 28555        | 113      | 571          | 2        |
| <i>RAD51D</i> | 1.12 (0.27-4.63)        | 8.7E-01        | 1.17 (0.28-4.88)               | 8.3E-01        | 28574        | 94       | 571          | 2        |
| <i>TP53</i>   | 0.88 (0.23-3.45)        | 8.6E-01        | 0.95 (0.24-3.79)               | 9.4E-01        | 28556        | 112      | 571          | 2        |

Abbreviations: No. = number; CBC = contralateral breast cancer; HR= hazard ration; CI = confidence interval; P = p-value. Analyses included women from 32 studies with information about contralateral breast cancer diagnosis. The analysis for each gene also excluded carriers of protein-truncating variants in that gene. Statistically significant associations (P<5E-02) are highlighted in bold.

<sup>a</sup> Adjusted analyses were performed by including age at diagnosis, nodal status, size category, grade, estrogen receptor (ER) status, ERB-B2 receptor tyrosine kinase 2 (*ERBB2*) status of the first breast cancer, (neo)adjuvant chemotherapy, endocrine therapy and trastuzumab as covariates in the Cox regression model.

**Table S16. Sensitivity analysis for the association of protein-truncating variants in 9 breast cancer genes and of pathogenic/likely pathogenic rare missense variants in *BRCA1*, *BRCA2* and *TP53* with risk of contralateral breast cancer in women from population- and hospital-based studies plus women without family history from studies including women with family history of breast cancer.**

| Gene                              | Unadjusted analyses     |                | Adjusted analyses <sup>a</sup> |                | No. of women |          | No. of CBC   |          |
|-----------------------------------|-------------------------|----------------|--------------------------------|----------------|--------------|----------|--------------|----------|
|                                   | HR (95%CI)              | P              | HR (95%CI)                     | P              | Non-carriers | Carriers | Non-carriers | Carriers |
| PTVs (unless indicated otherwise) |                         |                |                                |                |              |          |              |          |
| <i>ATM</i>                        | 1.13 (0.35-3.61)        | 8.3E-01        | 1.15 (0.36-3.70)               | 8.1E-01        | 26297        | 179      | 432          | 3        |
| <i>BARD1</i>                      | 1.49 (0.18-12.04)       | 7.1E-01        | 1.35 (0.17-10.71)              | 7.8E-01        | 26435        | 41       | 434          | 1        |
| <i>BRCA1</i> <sup>b</sup>         | <b>3.45 (2.01-5.92)</b> | <b>6.6E-06</b> | <b>3.13 (1.80-5.45)</b>        | <b>6.1E-05</b> | 26167        | 309      | 415          | 20       |
| <i>BRCA2</i> <sup>b</sup>         | <b>2.40 (1.36-4.24)</b> | <b>2.6E-03</b> | <b>2.26 (1.27-4.00)</b>        | <b>5.4E-03</b> | 26088        | 388      | 419          | 16       |
| <i>CHEK2</i>                      | <b>2.61 (1.58-4.32)</b> | <b>2.0E-04</b> | <b>2.65 (1.59-4.40)</b>        | <b>1.9E-04</b> | 25973        | 503      | 414          | 21       |
| c.1100delC                        | <b>2.70 (1.54-4.74)</b> | <b>5.5E-04</b> | <b>2.72 (1.54-4.79)</b>        | <b>5.7E-04</b> | 25973        | 398      | 414          | 17       |
| Other                             | 2.33 (0.76-7.15)        | 1.4E-01        | 2.39 (0.77-7.41)               | 1.3E-01        | 25973        | 105      | 414          | 4        |
| <i>PALB2</i>                      | <b>4.20 (1.94-9.07)</b> | <b>2.7E-04</b> | <b>4.00 (1.85-8.64)</b>        | <b>4.5E-04</b> | 26322        | 154      | 425          | 10       |
| <i>RAD51C</i>                     | NA                      | NA             | NA                             | NA             | 26450        | 26       | 435          | 0        |
| <i>RAD51D</i>                     | 2.16 (0.24-19.92)       | 5.0E-01        | 1.66 (0.19-14.18)              | 6.4E-01        | 26451        | 25       | 434          | 1        |
| <i>TP53</i> <sup>b</sup>          | NA                      | NA             | NA                             | NA             | 26453        | 23       | 435          | 0        |

Abbreviations: No. = number; CBC = contralateral breast cancer; PTVs = protein-truncating variants; HR = hazard ratio; CI = confidence interval; P = p-value.

Statistically significant associations ( $P < 5E-02$ ) are highlighted in bold. NA: not assessable due to absence of mutation carriers with events.

<sup>a</sup> Adjusted analyses were performed by including age at diagnosis, nodal status, size category, grade, estrogen receptor (ER) status, ERB-B2 receptor tyrosine kinase 2 (*ERBB2*) status of the first breast cancer, (neo)adjuvant chemotherapy, endocrine therapy and trastuzumab as covariates in the Cox regression model.

<sup>b</sup> Combined PTVs and rare pathogenic/likely pathogenic missense variants as defined in Dorling et al. (NEJM 2021).

**Table S17. Sensitivity analysis for the association of rare missense variants in 9 breast cancer genes with risk of contralateral breast cancer in women from population- and hospital-based studies plus women without family history from studies including women with family history of breast cancer.**

| Gene          | Unadjusted analyses |         | Adjusted analyses <sup>a</sup> |         | No. of women |          | No. of CBC   |          |
|---------------|---------------------|---------|--------------------------------|---------|--------------|----------|--------------|----------|
|               | HR (95%CI)          | P       | HR (95%CI)                     | P       | Non-carriers | Carriers | Non-carriers | Carriers |
| <i>ATM</i>    | 1.18 (0.78-1.77)    | 4.4E-01 | 1.17 (0.77-1.75)               | 4.6E-01 | 25012        | 1285     | 406          | 26       |
| <i>BARD1</i>  | 0.42 (0.13-1.40)    | 1.6E-01 | 0.43 (0.13-1.41)               | 1.6E-01 | 26136        | 299      | 432          | 2        |
| <i>BRCA1</i>  | 1.32 (0.77-2.27)    | 3.1E-01 | 1.34 (0.78-2.30)               | 2.9E-01 | 25499        | 706      | 401          | 15       |
| <i>BRCA2</i>  | 1.38 (0.94-2.03)    | 9.9E-02 | 1.37 (0.93-2.02)               | 1.1E-01 | 24740        | 1371     | 390          | 31       |
| <i>CHEK2</i>  | 1.71 (0.89-3.28)    | 1.1E-01 | 1.76 (0.91-3.39)               | 9.2E-02 | 25527        | 446      | 403          | 11       |
| <i>PALB2</i>  | 0.73 (0.29-1.87)    | 5.2E-01 | 0.75 (0.29-1.93)               | 5.5E-01 | 25974        | 348      | 421          | 4        |
| <i>RAD51C</i> | NA                  | NA      | NA                             | NA      | 26350        | 100      | 435          | 0        |
| <i>RAD51D</i> | 0.64 (0.10-3.96)    | 6.3E-01 | 0.62 (0.10-3.80)               | 6.0E-01 | 26366        | 85       | 433          | 1        |
| <i>TP53</i>   | 0.53 (0.09-3.08)    | 4.8E-01 | 0.54 (0.09-3.16)               | 4.9E-01 | 26348        | 126      | 434          | 1        |

Abbreviations: No. = number; CBC = contralateral breast cancer; HR = hazard ratio; CI = confidence interval; P = p-value. The analysis for each gene excluded carriers of protein-truncating variants in that gene. NA: not assessable due to absence of mutation carriers with events.

<sup>a</sup> Adjusted analyses were performed by including age at diagnosis, nodal status, size category, grade, estrogen receptor (ER) status, ERB-B2 receptor tyrosine kinase 2 (*ERBB2*) status of the first breast cancer, (neo)adjuvant chemotherapy, endocrine therapy and trastuzumab as covariates in the Cox regression model.

**Table S18. Association of protein-truncating variants in 25 putative breast cancer genes with risk of contralateral breast cancer.**

| Gene            | Unadjusted analyses      |                | Adjusted analyses <sup>a</sup> |                | No. of women |          | No. of CBC   |          |
|-----------------|--------------------------|----------------|--------------------------------|----------------|--------------|----------|--------------|----------|
|                 | HR (95%CI)               | P              | HR (95%CI)                     | P              | Non-carriers | Carriers | Non-carriers | Carriers |
| <i>ABRAXAS1</i> | NA                       | NA             | NA                             | NA             | 30618        | 10       | 676          | 0        |
| <i>AKT1</i>     | NA                       | NA             | NA                             | NA             | 30626        | 2        | 676          | 0        |
| <i>BABAM2</i>   | NA                       | NA             | NA                             | NA             | 30622        | 6        | 676          | 0        |
| <i>BRIP1</i>    | 0.94 (0.13-6.53)         | 9.5E-01        | 1.01 (0.14-7.21)               | 1.0E+00        | 30571        | 57       | 675          | 1        |
| <i>CDH1</i>     | 8.74(0.61-124.37)        | 1.1E-01        | 8.22(0.58-115.74)              | 1.2E-01        | 30622        | 6        | 675          | 1        |
| <i>EPCAM</i>    | NA                       | NA             | NA                             | NA             | 30621        | 7        | 676          | 0        |
| <i>FANCC</i>    | 1.33 (0.31-5.71)         | 7.0E-01        | 1.28 (0.30-5.50)               | 7.4E-01        | 30579        | 49       | 674          | 2        |
| <i>FANCM</i>    | 0.64 (0.26-1.61)         | 3.5E-01        | 0.64 (0.26-1.61)               | 3.4E-01        | 30384        | 244      | 672          | 4        |
| <i>GEN1</i>     | 6.85 (0.52-90.72)        | 1.4E-01        | 5.78 (0.46-73.22)              | 1.8E-01        | 30611        | 17       | 675          | 1        |
| <i>MEN1</i>     | NA                       | NA             | NA                             | NA             | 30625        | 3        | 676          | 0        |
| <i>MLH1</i>     | NA                       | NA             | NA                             | NA             | 30625        | 3        | 676          | 0        |
| <i>MRE11A</i>   | NA                       | NA             | NA                             | NA             | 30596        | 32       | 676          | 0        |
| <i>MSH2</i>     | NA                       | NA             | NA                             | NA             | 30619        | 9        | 676          | 0        |
| <i>MSH6</i>     | NA                       | NA             | NA                             | NA             | 30601        | 27       | 676          | 0        |
| <i>MUTYH</i>    | NA                       | NA             | NA                             | NA             | 30601        | 27       | 676          | 0        |
| <i>NBN</i>      | NA                       | NA             | NA                             | NA             | 30556        | 72       | 676          | 0        |
| <i>NF1</i>      | NA                       | NA             | NA                             | NA             | 30609        | 19       | 676          | 0        |
| <i>PIK3CA</i>   | NA                       | NA             | NA                             | NA             | 30622        | 6        | 676          | 0        |
| <i>PMS2</i>     | NA                       | NA             | NA                             | NA             | 30606        | 22       | 676          | 0        |
| <i>PTEN</i>     | 7.14 (1.13-44.88)        | 3.6E-02        | 5.35 (0.87-32.91)              | 7.0E-02        | 30616        | 12       | 674          | 2        |
| <i>RAD50</i>    | <b>4.81 (1.88-12.27)</b> | <b>1.0E-03</b> | <b>4.75 (1.86-12.15)</b>       | <b>1.2E-03</b> | 30537        | 91       | 669          | 7        |
| <i>RECQL</i>    | 1.95 (0.22-17.22)        | 5.5E-01        | 1.8 (0.21-15.62)               | 5.9E-01        | 30589        | 39       | 675          | 1        |
| <i>RINT1</i>    | 2.92 (0.57-15.00)        | 2.0E-01        | 2.86 (0.56-14.70)              | 2.1E-01        | 30605        | 23       | 674          | 2        |
| <i>STK11</i>    | NA                       | NA             | NA                             | NA             | 30626        | 2        | 676          | 0        |
| <i>XRCC2</i>    | NA                       | NA             | NA                             | NA             | 30620        | 8        | 676          | 0        |

Abbreviations: No. = number; CBC = contralateral breast cancer; HR = hazard ratio; CI = confidence interval; P = p-value.



Analyses included women from 32 studies with information about contralateral breast cancer diagnosis. Statistically significant associations after Bonferroni correction for 25 tests ( $P < 2E-03$ ) are highlighted in bold. NA: not assessable due to absence of mutation carriers with events.

Genes on the BRIDGES panel (Dorling et al., NEJM 2021) other than *ATM*, *BARD1*, *BRCA1*, *BRCA2*, *CHEK2*, *PALB2*, *RAD51C*, *RAD51D*, and *TP53* are presented here.

<sup>a</sup> Adjusted analyses were performed by including age at diagnosis, nodal status, size category, grade, estrogen receptor (ER) status, ERB-B2 receptor tyrosine kinase 2 (*ERBB2*) status of the first breast cancer, (neo)adjuvant chemotherapy, endocrine therapy and trastuzumab as covariates in the Cox regression model.

**Table S19. Association of rare missense variants in 25 putative breast cancer genes with risk of contralateral breast cancer.**

| Gene            | Unadjusted analyses     |                | Adjusted analyses <sup>a</sup> |                | No. of women |          | No. of CBC   |          |
|-----------------|-------------------------|----------------|--------------------------------|----------------|--------------|----------|--------------|----------|
|                 | HR (95%CI)              | P              | HR (95%CI)                     | P              | Non-carriers | Carriers | Non-carriers | Carriers |
| <i>ABRAXAS1</i> | 0.95 (0.31-2.93)        | 9.3E-01        | 0.96 (0.31-2.97)               | 9.4E-01        | 30488        | 130      | 673          | 3        |
| <i>AKT1</i>     | 1.98 (0.66-5.93)        | 2.2E-01        | 2.03 (0.67-6.10)               | 2.1E-01        | 30543        | 83       | 672          | 4        |
| <i>BABAM2</i>   | NA                      | NA             | NA                             | NA             | 30524        | 98       | 676          | 0        |
| <i>BRIP1</i>    | 1.09 (0.62-1.90)        | 7.7E-01        | 1.08 (0.62-1.89)               | 7.9E-01        | 30093        | 478      | 662          | 13       |
| <i>CDH1</i>     | 0.90 (0.45-1.80)        | 7.7E-01        | 0.90 (0.45-1.78)               | 7.5E-01        | 30266        | 356      | 667          | 8        |
| <i>EPCAM</i>    | 2.22 (1.01-4.89)        | 4.7E-02        | 2.27 (1.02-5.03)               | 4.4E-02        | 30482        | 139      | 668          | 8        |
| <i>FANCC</i>    | 0.72 (0.34-1.54)        | 3.9E-01        | 0.74 (0.34-1.58)               | 4.3E-01        | 30212        | 367      | 668          | 6        |
| <i>FANCM</i>    | 0.98 (0.62-1.55)        | 9.4E-01        | 0.98 (0.62-1.54)               | 9.2E-01        | 29497        | 887      | 653          | 19       |
| <i>GEN1</i>     | 0.43 (0.18-1.00)        | 5.0E-02        | 0.42 (0.18-0.98)               | 4.6E-02        | 30228        | 383      | 671          | 4        |
| <i>MEN1</i>     | 0.66 (0.11-4.07)        | 6.5E-01        | 0.71 (0.11-4.53)               | 7.2E-01        | 30548        | 77       | 675          | 1        |
| <i>MLH1</i>     | 1.05 (0.56-1.98)        | 8.7E-01        | 1.09 (0.58-2.06)               | 7.9E-01        | 30190        | 435      | 666          | 10       |
| <i>MRE11A</i>   | 1.27 (0.64-2.52)        | 4.9E-01        | 1.29 (0.65-2.58)               | 4.6E-01        | 30251        | 345      | 667          | 9        |
| <i>MSH2</i>     | 0.57 (0.27-1.18)        | 1.3E-01        | 0.58 (0.28-1.21)               | 1.4E-01        | 30141        | 478      | 670          | 6        |
| <i>MSH6</i>     | 1.08 (0.64-1.81)        | 7.7E-01        | 1.07 (0.64-1.80)               | 8.0E-01        | 29974        | 627      | 660          | 16       |
| <i>MUTYH</i>    | 0.69 (0.30-1.58)        | 3.8E-01        | 0.68 (0.30-1.56)               | 3.6E-01        | 30255        | 346      | 671          | 5        |
| <i>NBN</i>      | 1.49 (0.81-2.74)        | 2.0E-01        | 1.48 (0.80-2.73)               | 2.1E-01        | 30190        | 366      | 664          | 12       |
| <i>NF1</i>      | 1.48 (0.86-2.55)        | 1.6E-01        | 1.52 (0.88-2.64)               | 1.3E-01        | 30117        | 492      | 661          | 15       |
| <i>PIK3CA</i>   | 0.73 (0.19-2.71)        | 6.3E-01        | 0.72 (0.19-2.68)               | 6.2E-01        | 30504        | 118      | 674          | 2        |
| <i>PMS2</i>     | 1.69 (1.02-2.81)        | 4.3E-02        | 1.68 (1.01-2.79)               | 4.6E-02        | 30049        | 557      | 658          | 18       |
| <i>PTEN</i>     | NA                      | NA             | NA                             | NA             | 30561        | 55       | 674          | 0        |
| <i>RAD50</i>    | 1.36 (0.85-2.18)        | 1.9E-01        | 1.36 (0.85-2.18)               | 2.0E-01        | 29882        | 655      | 649          | 20       |
| <i>RECQL</i>    | 0.66 (0.29-1.51)        | 3.3E-01        | 0.68 (0.30-1.56)               | 3.6E-01        | 30250        | 339      | 670          | 5        |
| <i>RINT1</i>    | 1.03 (0.57-1.88)        | 9.2E-01        | 1.00 (0.55-1.81)               | 9.9E-01        | 30152        | 453      | 663          | 11       |
| <i>STK11</i>    | 1.04 (0.14-7.47)        | 9.7E-01        | 1.04 (0.14-7.57)               | 9.7E-01        | 30573        | 53       | 675          | 1        |
| <i>XRCC2</i>    | <b>3.87 (1.81-8.29)</b> | <b>5.0E-04</b> | <b>4.05 (1.88-8.73)</b>        | <b>3.8E-04</b> | 30494        | 126      | 666          | 10       |

Abbreviations: No. = number; CBC = contralateral breast cancer; HR = hazard ratio; CI = confidence interval; P = p-value.

Analyses included women from 32 studies with information about contralateral breast cancer diagnosis. Statistically significant associations after Bonferroni correction for 25 tests ( $P < 2E-03$ ) are highlighted in bold. NA: not assessable due to absence of mutation carriers with events.

Genes on the BRIDGES panel (Dorling et al., NEJM 2021) other than *ATM*, *BARD1*, *BRCA1*, *BRCA2*, *CHEK2*, *PALB2*, *RAD51C*, *RAD51D*, and *TP53* are presented here.

<sup>a</sup> Adjusted analyses were performed by including age at diagnosis, nodal status, size category, grade, estrogen receptor (ER) status, ERB-B2 receptor tyrosine kinase 2 (*ERBB2*) status of the first breast cancer, (neo)adjuvant chemotherapy, endocrine therapy and trastuzumab as covariates in the Cox regression model. The analysis for each gene excluded carriers of protein-truncating variants in that gene.

**Table S20. Association of protein-truncating variants in 25 putative breast cancer genes with risk of contralateral breast cancer in women diagnosed with ER-positive first breast cancer.**

| Gene            | Unadjusted analyses |         | Adjusted analyses <sup>a</sup> |         | No. of women |          | No. of CBC   |          |
|-----------------|---------------------|---------|--------------------------------|---------|--------------|----------|--------------|----------|
|                 | HR (95%CI)          | P       | HR (95%CI)                     | P       | Non-carriers | Carriers | Non-carriers | Carriers |
| <i>ABRAXAS1</i> | NA                  | NA      | NA                             | NA      | 19871        | 6        | 418          | 0        |
| <i>AKT1</i>     | NA                  | NA      | NA                             | NA      | 19875        | 2        | 418          | 0        |
| <i>BABAM2</i>   | NA                  | NA      | NA                             | NA      | 19872        | 5        | 418          | 0        |
| <i>BRIP1</i>    | NA                  | NA      | NA                             | NA      | 19847        | 30       | 418          | 0        |
| <i>CDH1</i>     | 11.54 (0.74-179.25) | 8.1E-02 | 9.79 (0.65-146.35)             | 9.8E-02 | 19873        | 4        | 417          | 1        |
| <i>EPCAM</i>    | NA                  | NA      | NA                             | NA      | 19872        | 5        | 418          | 0        |
| <i>FANCC</i>    | 1.31 (0.17-10.28)   | 8.0E-01 | 1.32 (0.17-10.52)              | 7.9E-01 | 19849        | 28       | 417          | 1        |
| <i>FANCM</i>    | 0.97 (0.36-2.59)    | 9.5E-01 | 0.97 (0.36-2.63)               | 9.6E-01 | 19728        | 149      | 414          | 4        |
| <i>GEN1</i>     | 12.36 (0.78-196.33) | 7.5E-02 | 10.62 (0.69-162.98)            | 9.0E-02 | 19867        | 10       | 417          | 1        |
| <i>MEN1</i>     | NA                  | NA      | NA                             | NA      | 19874        | 3        | 418          | 0        |
| <i>MLH1</i>     | NA                  | NA      | NA                             | NA      | 19875        | 2        | 418          | 0        |
| <i>MRE11A</i>   | NA                  | NA      | NA                             | NA      | 19855        | 22       | 418          | 0        |
| <i>MSH2</i>     | NA                  | NA      | NA                             | NA      | 19874        | 3        | 418          | 0        |
| <i>MSH6</i>     | NA                  | NA      | NA                             | NA      | 19860        | 17       | 418          | 0        |
| <i>MUTYH</i>    | NA                  | NA      | NA                             | NA      | 19858        | 19       | 418          | 0        |
| <i>NBN</i>      | NA                  | NA      | NA                             | NA      | 19823        | 54       | 418          | 0        |
| <i>NF1</i>      | NA                  | NA      | NA                             | NA      | 19866        | 11       | 418          | 0        |
| <i>PIK3CA</i>   | NA                  | NA      | NA                             | NA      | 19873        | 4        | 418          | 0        |
| <i>PMS2</i>     | NA                  | NA      | NA                             | NA      | 19863        | 14       | 418          | 0        |
| <i>PTEN</i>     | 22.74 (1.15-450.24) | 4.0E-02 | 24.95 (1.21-513.65)            | 3.7E-02 | 19873        | 4        | 417          | 1        |
| <i>RAD50</i>    | 5.15 (1.68-15.79)   | 4.1E-03 | 5.00 (1.63-15.34)              | 5.1E-03 | 19820        | 57       | 413          | 5        |
| <i>RECQL</i>    | 2.12 (0.23-19.34)   | 5.1E-01 | 1.96 (0.22-17.73)              | 5.5E-01 | 19850        | 27       | 417          | 1        |
| <i>RINT1</i>    | 2.75 (0.28-27.25)   | 3.9E-01 | 2.86 (0.28-28.95)              | 3.7E-01 | 19860        | 17       | 417          | 1        |
| <i>STK11</i>    | NA                  | NA      | NA                             | NA      | 19876        | 1        | 418          | 0        |
| <i>XRCC2</i>    | NA                  | NA      | NA                             | NA      | 19872        | 5        | 418          | 0        |

Abbreviations: No. = number; CBC = contralateral breast cancer; HR = hazard ratio; CI = confidence interval; P = p-value.

Analyses included women from 32 studies with information about contralateral breast cancer diagnosis. NA: not assessable due to absence of mutation carriers with events.

Genes on the BRIDGES panel (Dorling et al., NEJM 2021) other than *ATM*, *BARD1*, *BRCA1*, *BRCA2*, *CHEK2*, *PALB2*, *RAD51C*, *RAD51D*, and *TP53* are presented here.

<sup>a</sup> Adjusted analyses were performed by including age at diagnosis, nodal status, size category, grade, ERB-B2 receptor tyrosine kinase 2 (*ERBB2*) status of the first breast cancer, (neo)adjuvant chemotherapy, endocrine therapy and trastuzumab as covariates in the Cox regression model.

**Table S21. Association of protein-truncating variants in 25 putative breast cancer genes with risk of contralateral breast cancer in women diagnosed with ER-negative first breast cancer.**

| Gene            | Unadjusted analyses |         | Adjusted analyses <sup>a</sup> |         | No. of women |          | No. of CBC   |          |
|-----------------|---------------------|---------|--------------------------------|---------|--------------|----------|--------------|----------|
|                 | HR (95%CI)          | P       | HR (95%CI)                     | P       | Non-carriers | Carriers | Non-carriers | Carriers |
| <i>ABRAXAS1</i> | NA                  | NA      | NA                             | NA      | 5037         | 1        | 139          | 0        |
| <i>AKT1</i>     | NA                  | NA      | NA                             | NA      | 5038         | 0        | 139          | 0        |
| <i>BABAM2</i>   | NA                  | NA      | NA                             | NA      | 5038         | 0        | 139          | 0        |
| <i>BRIP1</i>    | 5.11 (0.42-62.75)   | 2.0E-01 | 5.41 (0.42-70.24)              | 1.9E-01 | 5027         | 11       | 138          | 1        |
| <i>CDH1</i>     | NA                  | NA      | NA                             | NA      | 5036         | 2        | 139          | 0        |
| <i>EPCAM</i>    | NA                  | NA      | NA                             | NA      | 5037         | 1        | 139          | 0        |
| <i>FANCC</i>    | 1.76 (0.20-15.18)   | 6.1E-01 | 1.59 (0.18-13.87)              | 6.7E-01 | 5025         | 13       | 138          | 1        |
| <i>FANCM</i>    | NA                  | NA      | NA                             | NA      | 4989         | 49       | 139          | 0        |
| <i>GEN1</i>     | NA                  | NA      | NA                             | NA      | 5034         | 4        | 139          | 0        |
| <i>MEN1</i>     | NA                  | NA      | NA                             | NA      | 5038         | 0        | 139          | 0        |
| <i>MLH1</i>     | NA                  | NA      | NA                             | NA      | 5037         | 1        | 139          | 0        |
| <i>MRE11A</i>   | NA                  | NA      | NA                             | NA      | 5032         | 6        | 139          | 0        |
| <i>MSH2</i>     | NA                  | NA      | NA                             | NA      | 5035         | 3        | 139          | 0        |
| <i>MSH6</i>     | NA                  | NA      | NA                             | NA      | 5029         | 9        | 139          | 0        |
| <i>MUTYH</i>    | NA                  | NA      | NA                             | NA      | 5032         | 6        | 139          | 0        |
| <i>NBN</i>      | NA                  | NA      | NA                             | NA      | 5026         | 12       | 139          | 0        |
| <i>NF1</i>      | NA                  | NA      | NA                             | NA      | 5034         | 4        | 139          | 0        |
| <i>PIK3CA</i>   | NA                  | NA      | NA                             | NA      | 5038         | 0        | 139          | 0        |
| <i>PMS2</i>     | NA                  | NA      | NA                             | NA      | 5035         | 3        | 139          | 0        |
| <i>PTEN</i>     | 7.38 (0.53-101.84)  | 1.4E-01 | 3.92 (0.30-52.00)              | 3.0E-01 | 5036         | 2        | 138          | 1        |
| <i>RAD50</i>    | 6.03 (0.99-36.70)   | 5.1E-02 | 6.27 (0.98-39.95)              | 5.2E-02 | 5022         | 16       | 137          | 2        |
| <i>RECQL</i>    | NA                  | NA      | NA                             | NA      | 5032         | 6        | 139          | 0        |
| <i>RINT1</i>    | NA                  | NA      | NA                             | NA      | 5036         | 2        | 139          | 0        |
| <i>STK11</i>    | NA                  | NA      | NA                             | NA      | 5038         | 0        | 139          | 0        |
| <i>XRCC2</i>    | NA                  | NA      | NA                             | NA      | 5036         | 2        | 139          | 0        |

Abbreviations: No. = number; CBC = contralateral breast cancer; HR = hazard ratio; CI = confidence interval; P = p-value.

Analyses included women from 32 studies with information about contralateral breast cancer diagnosis. NA: not assessable due to absence of mutation carriers with events.

Genes on the BRIDGES panel (Dorling et al., NEJM 2021) other than *ATM*, *BARD1*, *BRCA1*, *BRCA2*, *CHEK2*, *PALB2*, *RAD51C*, *RAD51D*, and *TP53* are presented here.

<sup>a</sup> Adjusted analyses were performed by including age at diagnosis, nodal status, size category, grade, ERB-B2 receptor tyrosine kinase 2 (*ERBB2*) status of the first breast cancer, (neo)adjuvant chemotherapy, endocrine therapy and trastuzumab as covariates in the Cox regression model.

**Table S22. Heterogeneity test for the association of protein-truncating variants in 25 putative breast cancer genes with contralateral breast cancer risk and breast cancer-specific survival, by ER status of the first breast cancer.**

| Gene            | Contralateral breast cancer risk |                | Breast cancer-specific survival |                |
|-----------------|----------------------------------|----------------|---------------------------------|----------------|
|                 | P                                | P <sup>a</sup> | P                               | P <sup>a</sup> |
| <i>ABRAXAS1</i> | NA                               | NA             | NA                              | NA             |
| <i>AKT1</i>     | NA                               | NA             | NA                              | NA             |
| <i>BABAM2</i>   | NA                               | NA             | NA                              | NA             |
| <i>BRIP1</i>    | NA                               | NA             | 4.5E-01                         | 2.6E-01        |
| <i>CDH1</i>     | NA                               | NA             | NA                              | NA             |
| <i>EPCAM</i>    | NA                               | NA             | NA                              | NA             |
| <i>FANCC</i>    | 7.9E-01                          | 7.9E-01        | 3.7E-01                         | 3.1E-01        |
| <i>FANCM</i>    | NA                               | NA             | 3.2E-01                         | 3.4E-01        |
| <i>GEN1</i>     | NA                               | NA             | 1.7E-02                         | 1.3E-02        |
| <i>MEN1</i>     | NA                               | NA             | NA                              | NA             |
| <i>MLH1</i>     | NA                               | NA             | NA                              | NA             |
| <i>MRE11A</i>   | NA                               | NA             | 4.8E-01                         | 4.8E-01        |
| <i>MSH2</i>     | NA                               | NA             | 5.6E-01                         | 8.6E-01        |
| <i>MSH6</i>     | NA                               | NA             | NA                              | NA             |
| <i>MUTYH</i>    | NA                               | NA             | NA                              | NA             |
| <i>NBN</i>      | NA                               | NA             | 8.5E-01                         | 8.0E-01        |
| <i>NF1</i>      | NA                               | NA             | NA                              | NA             |
| <i>PIK3CA</i>   | NA                               | NA             | NA                              | NA             |
| <i>PMS2</i>     | NA                               | NA             | NA                              | NA             |
| <i>PTEN</i>     | NA                               | NA             | NA                              | NA             |
| <i>RAD50</i>    | 7.5E-01                          | 7.5E-01        | 3.0E-01                         | 6.5E-01        |
| <i>RECQL</i>    | NA                               | NA             | 1.4E-01                         | 1.0E-01        |
| <i>RINT1</i>    | NA                               | NA             | NA                              | NA             |
| <i>STK11</i>    | NA                               | NA             | NA                              | NA             |
| <i>XRCC2</i>    | NA                               | NA             | NA                              | NA             |

Abbreviation: P = p-value. Heterogeneity tests are for the hazard ratio (HR) estimates presented in Tables S20-S21 (contralateral breast cancer risk) and S34-S35 (breast cancer-specific survival) and compare a model including main effects and an interaction term between the mutation carrier status and the ER status of the first breast cancer, with a model without the interaction term. NA: not assessable within ER-positive and/or ER-negative tumors due to absence of mutation carriers or of mutation carriers with events. Genes on the BRIDGES panel (Dorling et al., NEJM 2021) other than *ATM*, *BARD1*, *BRCA1*, *BRCA2*, *CHEK2*, *PALB2*, *RAD51C*,



*RAD51D*, and *TP53* are presented here. <sup>a</sup> The two model compared additionally include the covariates specified in Tables S20-S21 and S34-S35.

**Table S23. Association of rare missense variants in 25 putative breast cancer genes with risk of contralateral breast cancer in women diagnosed with ER-positive first breast cancer.**

| Gene            | Unadjusted analyses |         | Adjusted analyses <sup>a</sup> |         | No. of women |          | No. of CBC   |          |
|-----------------|---------------------|---------|--------------------------------|---------|--------------|----------|--------------|----------|
|                 | HR (95%CI)          | P       | HR (95%CI)                     | P       | Non-carriers | Carriers | Non-carriers | Carriers |
| <i>ABRAXAS1</i> | 1.55 (0.46-5.25)    | 4.8E-01 | 1.57 (0.46-5.36)               | 4.7E-01 | 19777        | 94       | 415          | 3        |
| <i>AKT1</i>     | 3.46 (0.88-13.6)    | 7.5E-02 | 3.74 (0.93-15.02)              | 6.3E-02 | 19831        | 44       | 415          | 3        |
| <i>BABAM2</i>   | NA                  | NA      | NA                             | NA      | 19810        | 62       | 418          | 0        |
| <i>BRIP1</i>    | 1.14 (0.56-2.34)    | 7.1E-01 | 1.14 (0.56-2.35)               | 7.2E-01 | 19548        | 299      | 410          | 8        |
| <i>CDH1</i>     | 1.24 (0.57-2.70)    | 5.8E-01 | 1.24 (0.57-2.71)               | 5.8E-01 | 19624        | 249      | 410          | 7        |
| <i>EPCAM</i>    | 0.48 (0.09-2.72)    | 4.1E-01 | 0.49 (0.09-2.83)               | 4.3E-01 | 19792        | 80       | 417          | 1        |
| <i>FANCC</i>    | 1.25 (0.54-2.89)    | 6.0E-01 | 1.27 (0.55-2.94)               | 5.8E-01 | 19603        | 246      | 411          | 6        |
| <i>FANCM</i>    | 1.47 (0.87-2.50)    | 1.5E-01 | 1.46 (0.86-2.49)               | 1.6E-01 | 19171        | 557      | 398          | 16       |
| <i>GEN1</i>     | 0.19 (0.04-0.78)    | 2.1E-02 | 0.18 (0.04-0.75)               | 1.9E-02 | 19622        | 245      | 416          | 1        |
| <i>MEN1</i>     | NA                  | NA      | NA                             | NA      | 19822        | 52       | 418          | 0        |
| <i>MLH1</i>     | 1.22 (0.56-2.63)    | 6.2E-01 | 1.26 (0.58-2.75)               | 5.6E-01 | 19614        | 261      | 411          | 7        |
| <i>MRE11A</i>   | 1.46 (0.62-3.44)    | 3.9E-01 | 1.51 (0.64-3.59)               | 3.5E-01 | 19639        | 216      | 412          | 6        |
| <i>MSH2</i>     | 0.67 (0.29-1.54)    | 3.4E-01 | 0.68 (0.29-1.59)               | 3.7E-01 | 19550        | 324      | 413          | 5        |
| <i>MSH6</i>     | 1.38 (0.75-2.52)    | 3.0E-01 | 1.35 (0.74-2.47)               | 3.3E-01 | 19456        | 404      | 406          | 12       |
| <i>MUTYH</i>    | 0.65 (0.23-1.87)    | 4.2E-01 | 0.64 (0.22-1.85)               | 4.1E-01 | 19644        | 214      | 415          | 3        |
| <i>NBN</i>      | 1.85 (0.86-4.00)    | 1.2E-01 | 1.87 (0.86-4.06)               | 1.1E-01 | 19602        | 221      | 410          | 8        |
| <i>NF1</i>      | 1.18 (0.58-2.43)    | 6.5E-01 | 1.24 (0.60-2.56)               | 5.7E-01 | 19533        | 333      | 410          | 8        |
| <i>PIK3CA</i>   | 1.08 (0.26-4.39)    | 9.2E-01 | 1.04 (0.25-4.22)               | 9.6E-01 | 19790        | 83       | 416          | 2        |
| <i>PMS2</i>     | 1.66 (0.87-3.17)    | 1.3E-01 | 1.67 (0.87-3.20)               | 1.2E-01 | 19507        | 356      | 407          | 11       |
| <i>PTEN</i>     | NA                  | NA      | NA                             | NA      | 19834        | 39       | 417          | 0        |
| <i>RAD50</i>    | 1.36 (0.76-2.42)    | 3.0E-01 | 1.35 (0.75-2.43)               | 3.1E-01 | 19389        | 431      | 400          | 13       |
| <i>RECQL</i>    | 0.21 (0.05-0.91)    | 3.7E-02 | 0.21 (0.05-0.94)               | 4.1E-02 | 19624        | 226      | 416          | 1        |
| <i>RINT1</i>    | 0.80 (0.34-1.89)    | 6.2E-01 | 0.78 (0.33-1.82)               | 5.6E-01 | 19566        | 294      | 412          | 5        |
| <i>STK11</i>    | 1.60 (0.19-13.29)   | 6.6E-01 | 1.64 (0.19-13.80)              | 6.5E-01 | 19839        | 37       | 417          | 1        |
| <i>XRCC2</i>    | 2.28 (0.74-6.98)    | 1.5E-01 | 2.35 (0.76-7.27)               | 1.4E-01 | 19790        | 82       | 414          | 4        |

Abbreviations: No. = number; CBC = contralateral breast cancer; HR = hazard ratio; CI = confidence interval; P = p-value.

Analyses included women from 32 studies with information about contralateral breast cancer diagnosis. NA: not assessable due to absence of mutation carriers with events. Genes on the BRIDGES panel (Dorling et al., NEJM 2021) other than *ATM*, *BARD1*, *BRCA1*, *BRCA2*, *CHEK2*, *PALB2*, *RAD51C*, *RAD51D*, and *TP53* are presented here.

<sup>a</sup> Adjusted analyses were performed by including age at diagnosis, nodal status, size category, grade, ERB-B2 receptor tyrosine kinase 2 (*ERBB2*) status of the first breast cancer, (neo)adjuvant chemotherapy, endocrine therapy and trastuzumab as covariates in the Cox regression model. The analysis for each gene excluded carriers of protein-truncating variants in that gene.

**Table S24. Association of rare missense variants in 25 putative breast cancer genes with risk of contralateral breast cancer in women diagnosed with ER-negative first breast cancer.**

| Gene            | Unadjusted analyses |         | Adjusted analyses <sup>a</sup> |         | No. of women |          | No. of CBC   |          |
|-----------------|---------------------|---------|--------------------------------|---------|--------------|----------|--------------|----------|
|                 | HR (95%CI)          | P       | HR (95%CI)                     | P       | Non-carriers | Carriers | Non-carriers | Carriers |
| <i>ABRAXAS1</i> | NA                  | NA      | NA                             | NA      | 5021         | 16       | 139          | 0        |
| <i>AKT1</i>     | 2.14 (0.23-19.70)   | 5.0E-01 | 2.29 (0.24-22.21)              | 4.7E-01 | 5021         | 17       | 138          | 1        |
| <i>BABAM2</i>   | NA                  | NA      | NA                             | NA      | 5020         | 18       | 139          | 0        |
| <i>BRIP1</i>    | 0.34 (0.07-1.80)    | 2.1E-01 | 0.33 (0.06-1.73)               | 1.9E-01 | 4935         | 92       | 137          | 1        |
| <i>CDH1</i>     | 0.87 (0.13-5.98)    | 8.9E-01 | 0.83 (0.12-5.81)               | 8.5E-01 | 4990         | 46       | 138          | 1        |
| <i>EPCAM</i>    | 4.08 (1.00-16.67)   | 5.0E-02 | 4.24 (1.00-18.00)              | 5.0E-02 | 5009         | 28       | 136          | 3        |
| <i>FANCC</i>    | NA                  | NA      | NA                             | NA      | 4960         | 65       | 138          | 0        |
| <i>FANCM</i>    | 0.63 (0.22-1.83)    | 3.9E-01 | 0.68 (0.23-2.03)               | 4.9E-01 | 4830         | 159      | 136          | 3        |
| <i>GEN1</i>     | 0.51 (0.09-2.99)    | 4.6E-01 | 0.47 (0.08-2.72)               | 3.9E-01 | 4973         | 61       | 138          | 1        |
| <i>MEN1</i>     | 3.76 (0.33-42.79)   | 2.9E-01 | 4.52 (0.36-56.4)               | 2.4E-01 | 5028         | 10       | 138          | 1        |
| <i>MLH1</i>     | 0.77 (0.20-2.96)    | 7.0E-01 | 0.81 (0.20-3.19)               | 7.6E-01 | 4958         | 79       | 137          | 2        |
| <i>MRE11A</i>   | 1.23 (0.29-5.29)    | 7.8E-01 | 1.27 (0.29-5.68)               | 7.5E-01 | 4975         | 57       | 137          | 2        |
| <i>MSH2</i>     | NA                  | NA      | NA                             | NA      | 4971         | 64       | 139          | 0        |
| <i>MSH6</i>     | 0.38 (0.07-2.02)    | 2.6E-01 | 0.37 (0.07-1.96)               | 2.4E-01 | 4936         | 93       | 138          | 1        |
| <i>MUTYH</i>    | 0.86 (0.12-5.88)    | 8.8E-01 | 0.85 (0.12-6.04)               | 8.7E-01 | 4968         | 64       | 138          | 1        |
| <i>NBN</i>      | 1.70 (0.49-5.92)    | 4.0E-01 | 1.85 (0.51-6.66)               | 3.5E-01 | 4958         | 68       | 136          | 3        |
| <i>NF1</i>      | 1.86 (0.53-6.58)    | 3.3E-01 | 1.92 (0.53-6.98)               | 3.2E-01 | 4957         | 77       | 136          | 3        |
| <i>PIK3CA</i>   | NA                  | NA      | NA                             | NA      | 5018         | 20       | 139          | 0        |
| <i>PMS2</i>     | 1.53 (0.53-4.45)    | 4.3E-01 | 1.56 (0.53-4.64)               | 4.2E-01 | 4934         | 101      | 135          | 4        |
| <i>PTEN</i>     | NA                  | NA      | NA                             | NA      | 5028         | 8        | 138          | 0        |
| <i>RAD50</i>    | 0.77 (0.20-2.95)    | 7.0E-01 | 0.81 (0.20-3.20)               | 7.6E-01 | 4939         | 83       | 135          | 2        |
| <i>RECQL</i>    | 2.36 (0.76-7.35)    | 1.4E-01 | 2.55 (0.79-8.20)               | 1.2E-01 | 4976         | 56       | 135          | 4        |
| <i>RINT1</i>    | 1.57 (0.54-4.58)    | 4.1E-01 | 1.40 (0.48-4.09)               | 5.3E-01 | 4945         | 91       | 135          | 4        |
| <i>STK11</i>    | NA                  | NA      | NA                             | NA      | 5032         | 6        | 139          | 0        |
| <i>XRCC2</i>    | 3.94 (0.71-22.04)   | 1.2E-01 | 4.77 (0.80-28.49)              | 8.6E-02 | 5014         | 22       | 137          | 2        |

Abbreviations: No. = number; CBC = contralateral breast cancer; HR = hazard ratio; CI = confidence interval; P = p-value.

Analyses included women from 32 studies with information about contralateral breast cancer diagnosis. NA: not assessable due to absence of mutation carriers with events. Genes on the BRIDGES panel (Dorling et al., NEJM 2021) other than *ATM*, *BARD1*, *BRCA1*, *BRCA2*, *CHEK2*, *PALB2*, *RAD51C*, *RAD51D*, and *TP53* are presented here.

<sup>a</sup> Adjusted analyses were performed by including age at diagnosis, nodal status, size category, grade, ERB-B2 receptor tyrosine kinase 2 (*ERBB2*) status of the first breast cancer, (neo)adjuvant chemotherapy, endocrine therapy and trastuzumab as covariates in the Cox regression model. The analysis for each gene excluded carriers of protein-truncating variants in that gene.

**Table S25. Heterogeneity test for the association of rare missense variants in 25 putative breast cancer genes with contralateral breast cancer risk and breast cancer-specific survival, by ER status of the first breast cancer.**

| Gene            | Contralateral breast cancer risk |                | Breast cancer-specific survival |                |
|-----------------|----------------------------------|----------------|---------------------------------|----------------|
|                 | P                                | P <sup>a</sup> | P                               | P <sup>a</sup> |
| <i>ABRAXAS1</i> | NA                               | NA             | 9.5E-01                         | 8.5E-01        |
| <i>AKT1</i>     | 6.9E-01                          | 6.4E-01        | 5.4E-01                         | 3.1E-01        |
| <i>BABAM2</i>   | NA                               | NA             | 4.9E-02                         | 4.9E-02        |
| <i>BRIP1</i>    | 3.1E-01                          | 3.5E-01        | 8.4E-01                         | 7.8E-01        |
| <i>CDH1</i>     | 6.1E-01                          | 6.2E-01        | 3.2E-01                         | 6.1E-01        |
| <i>EPCAM</i>    | 4.3E-02                          | 6.6E-02        | 2.1E-01                         | 4.1E-01        |
| <i>FANCC</i>    | NA                               | NA             | 1.7E-01                         | 2.0E-01        |
| <i>FANCM</i>    | 1.6E-01                          | 2.2E-01        | 1.2E-01                         | 2.4E-01        |
| <i>GEN1</i>     | 5.3E-01                          | 5.4E-01        | 2.9E-01                         | 1.8E-01        |
| <i>MEN1</i>     | NA                               | NA             | 5.5E-01                         | 8.9E-01        |
| <i>MLH1</i>     | 7.0E-01                          | 7.3E-01        | 9.7E-01                         | 8.2E-01        |
| <i>MRE11A</i>   | 7.9E-01                          | 8.0E-01        | 3.2E-01                         | 3.5E-01        |
| <i>MSH2</i>     | NA                               | NA             | 2.0E-01                         | 4.1E-01        |
| <i>MSH6</i>     | 1.5E-01                          | 2.4E-01        | 7.2E-01                         | 9.8E-01        |
| <i>MUTYH</i>    | 7.7E-01                          | 7.2E-01        | 3.2E-01                         | 5.3E-01        |
| <i>NBN</i>      | 8.5E-01                          | 9.0E-01        | 3.2E-01                         | 4.2E-01        |
| <i>NF1</i>      | 4.5E-01                          | 4.5E-01        | 8.7E-02                         | 4.5E-02        |
| <i>PIK3CA</i>   | NA                               | NA             | 9.2E-01                         | 9.1E-01        |
| <i>PMS2</i>     | 8.8E-01                          | 9.2E-01        | 6.0E-01                         | 7.5E-01        |
| <i>PTEN</i>     | NA                               | NA             | 6.9E-01                         | 8.8E-01        |
| <i>RAD50</i>    | 3.1E-01                          | 3.5E-01        | 9.7E-01                         | 5.1E-01        |
| <i>RECQL</i>    | 1.6E-02                          | 3.0E-02        | 1.8E-01                         | 1.6E-01        |
| <i>RINT1</i>    | 2.3E-01                          | 2.4E-01        | 5.0E-02                         | 6.2E-02        |
| <i>STK11</i>    | NA                               | NA             | 1.2E-01                         | 2.5E-01        |
| <i>XRCC2</i>    | 4.2E-01                          | 3.2E-01        | 3.8E-02                         | 3.6E-02        |

Abbreviation: P = p-value. Heterogeneity tests are for the hazard ratio (HR) estimates presented in Tables S23-S24 (contralateral breast cancer risk) and S37-S38 (breast cancer-specific survival) and compare a model including main effects and an interaction term between the mutation carrier status and the ER status of the first breast cancer, with a model without the interaction term. NA: not assessable within ER-positive and/or ER-negative tumors due to absence of mutation carriers or of mutation carriers with events. Genes on the BRIDGES panel (Dorling et al., NEJM 2021) other than *ATM*, *BARD1*, *BRCA1*, *BRCA2*, *CHEK2*, *PALB2*, *RAD51C*, *RAD51D*, and *TP53* are presented here.

<sup>a</sup>The two model compared additionally include the covariates specified in Tables S23-S24 and S37-S38.

**Table S26. Association of protein-truncating variants in 9 breast cancer genes and of pathogenic/likely pathogenic rare missense variants in *BRCA1*, *BRCA2* and *TP53* with breast cancer-specific survival in women diagnosed with ER-positive first breast cancer.**

| Gene                              | Unadjusted analyses     |                | Adjusted analyses <sup>a</sup> |                | No. of women |          | No. of BC deaths |          |
|-----------------------------------|-------------------------|----------------|--------------------------------|----------------|--------------|----------|------------------|----------|
|                                   | HR (95%CI)              | P              | HR (95%CI)                     | P              | Non-carriers | Carriers | Non-carriers     | Carriers |
| PTVs (unless indicated otherwise) |                         |                |                                |                |              |          |                  |          |
| <i>ATM</i>                        | 1.37 (0.83-2.27)        | 2.2E-01        | 1.08 (0.66-1.76)               | 7.6E-01        | 22429        | 161      | 1980             | 17       |
| <i>BARD1</i>                      | 1.12 (0.27-4.59)        | 8.8E-01        | 1.69 (0.37-7.71)               | 5.0E-01        | 22567        | 23       | 1995             | 2        |
| <i>BRCA1</i> <sup>b</sup>         | <b>1.87 (1.00-3.51)</b> | <b>5.0E-02</b> | 1.60 (0.86-2.97)               | 1.4E-01        | 22505        | 85       | 1985             | 12       |
| <i>BRCA2</i> <sup>b</sup>         | <b>2.14 (1.57-2.93)</b> | <b>1.7E-06</b> | <b>1.53 (1.13-2.07)</b>        | <b>5.4E-03</b> | 22299        | 291      | 1946             | 51       |
| <i>CHEK2</i>                      | <b>1.62 (1.25-2.10)</b> | <b>2.4E-04</b> | <b>1.46 (1.13-1.89)</b>        | <b>3.9E-03</b> | 22089        | 501      | 1927             | 70       |
| c.1100delC                        | <b>1.73 (1.31-2.29)</b> | <b>1.1E-04</b> | <b>1.55 (1.18-2.05)</b>        | <b>1.9E-03</b> | 22089        | 408      | 1927             | 61       |
| Other                             | 1.14 (0.58-2.23)        | 7.0E-01        | 1.04 (0.54-2.02)               | 9.1E-01        | 22089        | 93       | 1927             | 9        |
| <i>PALB2</i>                      | <b>2.02 (1.26-3.23)</b> | <b>3.3E-03</b> | 1.50 (0.96-2.36)               | 7.8E-02        | 22458        | 132      | 1975             | 22       |
| <i>RAD51C</i>                     | NA                      | NA             | NA                             | NA             | 22571        | 19       | 1997             | 0        |
| <i>RAD51D</i>                     | 0.71 (0.11-4.49)        | 7.1E-01        | 0.71 (0.11-4.51)               | 7.1E-01        | 22578        | 12       | 1996             | 1        |
| <i>TP53</i> <sup>b</sup>          | <b>2.86 (1.02-8.02)</b> | <b>4.6E-02</b> | 1.92 (0.72-5.12)               | 1.9E-01        | 22559        | 31       | 1992             | 5        |

Abbreviations: No. = number; BC = breast cancer; PTVs = protein-truncating variants; HR = hazard ratio; CI = confidence interval; P = p-value.

Analyses included women from 34 studies listed in Table S1. Women who developed a CBC before study entry are excluded. Statistically significant associations ( $P < 5E-02$ ) are highlighted in bold. NA: not assessable due to absence of mutation carriers with events.

<sup>a</sup>Adjusted analyses were performed by including age at diagnosis, nodal status, size category, grade, ERB-B2 receptor tyrosine kinase 2 (*ERBB2*) status of the first breast cancer, (neo)adjuvant chemotherapy, endocrine therapy and trastuzumab as covariates in the Cox regression model.

<sup>b</sup> Combined PTVs and rare pathogenic/likely pathogenic missense variants as defined in Dorling et al. (NEJM 2021).

**Table S27. Association of protein-truncating variants in 9 breast cancer genes and of pathogenic/likely pathogenic rare missense variants in *BRCA1*, *BRCA2* and *TP53* with breast cancer-specific survival in women diagnosed with ER-negative first breast cancer.**

| Gene                              | Unadjusted analyses     |                | Adjusted analyses <sup>a</sup> |         | No. of women |          | No. of BC deaths |          |
|-----------------------------------|-------------------------|----------------|--------------------------------|---------|--------------|----------|------------------|----------|
|                                   | HR (95%CI)              | P              | HR (95%CI)                     | P       | Non-carriers | Carriers | Non-carriers     | Carriers |
| PTVs (unless indicated otherwise) |                         |                |                                |         |              |          |                  |          |
| <i>ATM</i>                        | 0.90 (0.34-2.40)        | 8.4E-01        | 0.77 (0.30-2.02)               | 6.0E-01 | 5642         | 23       | 830              | 4        |
| <i>BARD1</i>                      | 0.73 (0.19-2.71)        | 6.4E-01        | 0.58 (0.16-2.09)               | 4.1E-01 | 5644         | 21       | 832              | 2        |
| <i>BRCA1</i> <sup>b</sup>         | <b>0.66 (0.44-0.99)</b> | <b>4.3E-02</b> | 0.72 (0.48-1.09)               | 1.2E-01 | 5447         | 218      | 812              | 22       |
| <i>BRCA2</i> <sup>b</sup>         | 0.74 (0.43-1.26)        | 2.7E-01        | 0.76 (0.44-1.31)               | 3.2E-01 | 5566         | 99       | 822              | 12       |
| <i>CHEK2</i>                      | 1.32 (0.77-2.25)        | 3.1E-01        | 1.15 (0.67-1.95)               | 6.1E-01 | 5589         | 76       | 819              | 15       |
| c.1100delC                        | 1.24 (0.67-2.30)        | 5.0E-01        | 1.17 (0.63-2.19)               | 6.1E-01 | 5589         | 57       | 819              | 11       |
| Other                             | 1.58 (0.55-4.56)        | 4.0E-01        | 1.08 (0.39-2.95)               | 8.9E-01 | 5589         | 19       | 819              | 4        |
| <i>PALB2</i>                      | 1.29 (0.65-2.56)        | 4.7E-01        | 1.26 (0.63-2.50)               | 5.1E-01 | 5617         | 48       | 825              | 9        |
| <i>RAD51C</i>                     | 1.34 (0.41-4.41)        | 6.3E-01        | 1.41 (0.41-4.83)               | 5.8E-01 | 5653         | 12       | 831              | 3        |
| <i>RAD51D</i>                     | 0.82 (0.21-3.13)        | 7.7E-01        | 0.70 (0.19-2.62)               | 6.0E-01 | 5654         | 11       | 832              | 2        |
| <i>TP53</i> <sup>b</sup>          | 0.73 (0.11-4.70)        | 7.4E-01        | 1.06 (0.14-7.77)               | 9.6E-01 | 5655         | 10       | 833              | 1        |

Abbreviations: No. = number; BC = breast cancer; PTVs = protein-truncating variants; HR = hazard ratio; CI = confidence interval; P = p-value.

Analyses included women from 34 studies listed in Table S1. Women who developed a CBC before study entry are excluded. Statistically significant associations ( $P < 5E-02$ ) are highlighted in bold.

<sup>a</sup> Adjusted analyses were performed by including age at diagnosis, nodal status, size category, grade, ERB-B2 receptor tyrosine kinase 2 (*ERBB2*) status of the first breast cancer, (neo)adjuvant chemotherapy, endocrine therapy and trastuzumab as covariates in the Cox regression model.

<sup>b</sup> Combined PTVs and rare pathogenic/likely pathogenic missense variants as defined in Dorling et al. (NEJM 2021).

**Table S28. Association of rare missense variants in 9 breast cancer genes with breast cancer-specific survival.**

| Gene          | Unadjusted analyses     |                | Adjusted analyses <sup>a</sup> |                | No. of women |          | No. of BC deaths |          |
|---------------|-------------------------|----------------|--------------------------------|----------------|--------------|----------|------------------|----------|
|               | HR (95%CI)              | P              | HR (95%CI)                     | P              | Non-carriers | Carriers | Non-carriers     | Carriers |
| <i>ATM</i>    | 1.00 (0.85-1.16)        | 9.6E-01        | 0.98 (0.84-1.14)               | 7.8E-01        | 32411        | 1740     | 3248             | 173      |
| <i>BARD1</i>  | 1.17 (0.87-1.59)        | 3.0E-01        | 1.15 (0.85-1.55)               | 3.7E-01        | 33944        | 403      | 3399             | 45       |
| <i>BRCA1</i>  | 1.14 (0.93-1.39)        | 2.0E-01        | 1.13 (0.92-1.38)               | 2.4E-01        | 33160        | 921      | 3307             | 103      |
| <i>BRCA2</i>  | 1.05 (0.90-1.21)        | 5.5E-01        | 1.01 (0.87-1.18)               | 8.5E-01        | 32116        | 1833     | 3190             | 189      |
| <i>CHEK2</i>  | 1.27 (1.00-1.62)        | 5.1E-02        | 1.23 (0.97-1.57)               | 9.4E-02        | 33091        | 611      | 3277             | 72       |
| <i>PALB2</i>  | 1.11 (0.84-1.48)        | 4.6E-01        | 1.09 (0.82-1.45)               | 5.6E-01        | 33735        | 442      | 3365             | 49       |
| <i>RAD51C</i> | 1.17 (0.69-1.96)        | 5.6E-01        | 1.19 (0.70-2.00)               | 5.2E-01        | 34223        | 138      | 3431             | 15       |
| <i>RAD51D</i> | 0.80 (0.42-1.50)        | 4.8E-01        | 0.74 (0.40-1.39)               | 3.5E-01        | 34256        | 114      | 3434             | 9        |
| <i>TP53</i>   | <b>1.84 (1.26-2.70)</b> | <b>1.8E-03</b> | <b>1.63 (1.11-2.38)</b>        | <b>1.2E-02</b> | 34218        | 179      | 3416             | 32       |

Abbreviations: No. = number; BC = breast cancer; HR = hazard ratio; CI = confidence interval; P = p-value.

Analyses included women from 34 studies listed in Table S1. Women who developed a CBC before study entry are excluded. The analysis for each gene excluded carriers of protein-truncating variants in that gene. Statistically significant associations ( $P < 5E-02$ ) are highlighted in bold.

<sup>a</sup>Adjusted analyses were performed by including age at diagnosis, nodal status, size category, grade, estrogen receptor (ER) status, ERB-B2 receptor tyrosine kinase 2 (*ERBB2*) status of the first breast cancer, (neo)adjuvant chemotherapy, endocrine therapy and trastuzumab as covariates in the Cox regression model.



**Table S29. Association of rare missense variants in 9 breast cancer genes with breast cancer-specific survival in women diagnosed with ER-positive first breast cancer.**

| Gene          | Unadjusted analyses     |                | Adjusted analyses <sup>a</sup> |                | No. of women |          | No. of BC deaths |          |
|---------------|-------------------------|----------------|--------------------------------|----------------|--------------|----------|------------------|----------|
|               | HR (95%CI)              | P              | HR (95%CI)                     | P              | Non-carriers | Carriers | Non-carriers     | Carriers |
| <i>ATM</i>    | 1.11 (0.91-1.35)        | 3.1E-01        | 1.05 (0.87-1.28)               | 6.0E-01        | 21275        | 1154     | 1870             | 110      |
| <i>BARD1</i>  | 1.10 (0.73-1.66)        | 6.4E-01        | 1.04 (0.69-1.56)               | 8.6E-01        | 22301        | 266      | 1971             | 24       |
| <i>BRCA1</i>  | 1.10 (0.84-1.43)        | 4.9E-01        | 1.10 (0.84-1.44)               | 4.8E-01        | 21920        | 595      | 1928             | 58       |
| <i>BRCA2</i>  | 1.00 (0.82-1.22)        | 9.8E-01        | 1.00 (0.82-1.23)               | 9.8E-01        | 21144        | 1174     | 1847             | 102      |
| <i>CHEK2</i>  | <b>1.44 (1.07-1.96)</b> | <b>1.8E-02</b> | 1.33 (0.98-1.80)               | 6.5E-02        | 21665        | 424      | 1879             | 48       |
| <i>PALB2</i>  | 1.14 (0.79-1.64)        | 4.8E-01        | 1.10 (0.76-1.57)               | 6.2E-01        | 22152        | 306      | 1944             | 31       |
| <i>RAD51C</i> | 1.11 (0.55-2.25)        | 7.7E-01        | 1.17 (0.57-2.39)               | 6.7E-01        | 22488        | 83       | 1989             | 8        |
| <i>RAD51D</i> | 0.83 (0.36-1.95)        | 6.7E-01        | 0.75 (0.32-1.73)               | 5.0E-01        | 22505        | 73       | 1991             | 5        |
| <i>TP53</i>   | <b>2.06 (1.26-3.37)</b> | <b>4.0E-03</b> | <b>1.64 (1.01-2.64)</b>        | <b>4.4E-02</b> | 22470        | 119      | 1977             | 20       |

Abbreviations: No. = number; BC = breast cancer; HR = hazard ratio; CI = confidence interval; P = p-value.

Analyses included women from 34 studies listed in Table S1. Women who developed a CBC before study entry are excluded. The analysis for each gene excluded carriers of protein-truncating variants in that gene. Statistically significant associations after ( $P < 5E-02$ ) are highlighted in bold.

<sup>a</sup>Adjusted analyses were performed by including age at diagnosis, nodal status, size category, grade, ERB-B2 receptor tyrosine kinase 2 (*ERBB2*) status of the first breast cancer, (neo)adjuvant chemotherapy, endocrine therapy and trastuzumab as covariates in the Cox regression model.

**Table S30. Association of rare missense variants in 9 breast cancer genes with breast cancer-specific survival in women diagnosed with ER-negative first breast cancer.**

| Gene          | Unadjusted analyses |         | Adjusted analyses <sup>a</sup> |         | No. of women |          | No. of BC deaths |          |
|---------------|---------------------|---------|--------------------------------|---------|--------------|----------|------------------|----------|
|               | HR (95%CI)          | P       | HR (95%CI)                     | P       | Non-carriers | Carriers | Non-carriers     | Carriers |
| <i>ATM</i>    | 0.93 (0.68-1.27)    | 6.4E-01 | 0.88 (0.64-1.20)               | 4.2E-01 | 5357         | 285      | 789              | 41       |
| <i>BARD1</i>  | 0.81 (0.43-1.53)    | 5.1E-01 | 0.87 (0.45-1.65)               | 6.6E-01 | 5571         | 73       | 823              | 9        |
| <i>BRCA1</i>  | 1.21 (0.83-1.76)    | 3.3E-01 | 1.21 (0.83-1.77)               | 3.3E-01 | 5302         | 172      | 784              | 30       |
| <i>BRCA2</i>  | 1.13 (0.86-1.50)    | 3.9E-01 | 1.05 (0.79-1.39)               | 7.4E-01 | 5241         | 332      | 770              | 55       |
| <i>CHEK2</i>  | 1.11 (0.59-2.10)    | 7.5E-01 | 0.96 (0.51-1.81)               | 9.1E-01 | 5522         | 67       | 809              | 10       |
| <i>PALB2</i>  | 0.88 (0.46-1.67)    | 7.0E-01 | 0.82 (0.43-1.56)               | 5.5E-01 | 5550         | 67       | 816              | 9        |
| <i>RAD51C</i> | 1.02 (0.37-2.76)    | 9.7E-01 | 1.02 (0.37-2.82)               | 9.7E-01 | 5622         | 31       | 827              | 4        |
| <i>RAD51D</i> | 0.59 (0.17-2.11)    | 4.2E-01 | 0.64 (0.17-2.33)               | 5.0E-01 | 5632         | 22       | 830              | 2        |
| <i>TP53</i>   | 1.05 (0.47-2.37)    | 9.0E-01 | 1.15 (0.50-2.64)               | 7.3E-01 | 5629         | 33       | 827              | 6        |

Abbreviations: No. = number; BC = breast cancer; HR = hazard ratio; CI = confidence interval; P = p-value.

Analyses included women from 34 studies listed in Table S1. Women who developed a CBC before study entry are excluded. The analysis for each gene excluded carriers of protein-truncating variants in that gene.

<sup>a</sup> Adjusted analyses were performed by including age at diagnosis, nodal status, size category, grade, ERB-B2 receptor tyrosine kinase 2 (*ERBB2*) status of the first breast cancer, (neo)adjuvant chemotherapy, endocrine therapy and trastuzumab as covariates in the Cox regression model.

**Table S31. Sensitivity analysis for the association of protein-truncating variants in 9 breast cancer genes and of pathogenic/likely pathogenic rare missense variants in *BRCA1*, *BRCA2* and *TP53* with breast cancer-specific survival in women from population- and hospital-based studies plus women without family history from studies including women with family history of breast cancer.**

| Gene                              | Unadjusted analyses     |                | Adjusted analyses <sup>a</sup> |                | No. of women |          | No. of BC deaths |          |
|-----------------------------------|-------------------------|----------------|--------------------------------|----------------|--------------|----------|------------------|----------|
|                                   | HR (95%CI)              | P              | HR (95%CI)                     | P              | Non-carriers | Carriers | Non-carriers     | Carriers |
| PTVs (unless indicated otherwise) |                         |                |                                |                |              |          |                  |          |
| <i>ATM</i>                        | 1.20 (0.78-1.83)        | 4.1E-01        | 1.08 (0.71-1.64)               | 7.3E-01        | 30022        | 200      | 3068             | 23       |
| <i>BARD1</i>                      | 1.05 (0.39-2.83)        | 9.2E-01        | 0.79 (0.31-2.04)               | 6.3E-01        | 30178        | 44       | 3087             | 4        |
| <i>BRCA1</i> <sup>b</sup>         | 1.27 (0.92-1.75)        | 1.5E-01        | 0.89 (0.66-1.22)               | 4.8E-01        | 29879        | 343      | 3050             | 41       |
| <i>BRCA2</i> <sup>b</sup>         | <b>1.62 (1.27-2.08)</b> | <b>1.3E-04</b> | 1.24 (0.98-1.58)               | 7.7E-02        | 29767        | 455      | 3016             | 75       |
| <i>CHEK2</i>                      | <b>1.38 (1.09-1.76)</b> | <b>8.4E-03</b> | 1.27 (1.00-1.61)               | 5.1E-02        | 29676        | 546      | 3016             | 75       |
| c.1100delC                        | <b>1.41 (1.07-1.84)</b> | <b>1.3E-02</b> | <b>1.35 (1.03-1.76)</b>        | <b>3.0E-02</b> | 29676        | 429      | 3016             | 60       |
| Other                             | 1.30 (0.77-2.21)        | 3.3E-01        | 1.03 (0.62-1.72)               | 9.0E-01        | 29676        | 117      | 3016             | 15       |
| <i>PALB2</i>                      | <b>1.71 (1.15-2.53)</b> | <b>7.3E-03</b> | 1.36 (0.93-1.98)               | 1.2E-01        | 30044        | 178      | 3061             | 30       |
| <i>RAD51C</i>                     | 0.71 (0.19-2.63)        | 6.1E-01        | 0.68 (0.18-2.52)               | 5.6E-01        | 30193        | 29       | 3089             | 2        |
| <i>RAD51D</i>                     | 1.36 (0.54-3.43)        | 5.1E-01        | 0.85 (0.36-2.00)               | 7.0E-01        | 30195        | 27       | 3086             | 5        |
| <i>TP53</i> <sup>b</sup>          | <b>2.73 (1.15-6.47)</b> | <b>2.3E-02</b> | 2.17 (0.93-5.07)               | 7.4E-02        | 30194        | 28       | 3084             | 7        |

Abbreviations: No. = number; BC = breast cancer; PTVs = protein-truncating variants; HR = hazard ratio; CI = confidence interval; P = p-value.

Women who developed a CBC before study entry are excluded. Statistically significant associations ( $P < 5E-02$ ) are highlighted in bold.

<sup>a</sup>Adjusted analyses were performed by including age at diagnosis, nodal status, size category, grade, estrogen receptor (ER) status, ERB-B2 receptor tyrosine kinase 2 (*ERBB2*) status of the first breast cancer, (neo)adjuvant chemotherapy, endocrine therapy and trastuzumab as covariates in the Cox regression model.

<sup>b</sup> Combined PTVs and rare pathogenic/likely pathogenic missense variants as defined in Dorling et al. (NEJM 2021).

**Table S32. Sensitivity analysis for the association of rare missense variants in 9 breast cancer genes with breast cancer-specific survival in women from population- and hospital-based studies plus women without family history from studies including women with family history of breast cancer.**

| Gene          | Unadjusted analyses     |                | Adjusted analyses <sup>a</sup> |                | No. of women |          | No. BC deaths |          |
|---------------|-------------------------|----------------|--------------------------------|----------------|--------------|----------|---------------|----------|
|               | HR (95%CI)              | P              | HR (95%CI)                     | P              | Non-carriers | Carriers | Non-carriers  | Carriers |
| <i>ATM</i>    | 1.02 (0.87-1.21)        | 7.8E-01        | 0.99 (0.84-1.17)               | 9.0E-01        | 28553        | 1469     | 2914          | 154      |
| <i>BARD1</i>  | 1.14 (0.82-1.57)        | 4.3E-01        | 1.12 (0.81-1.55)               | 4.8E-01        | 29827        | 351      | 3048          | 39       |
| <i>BRCA1</i>  | 1.11 (0.90-1.38)        | 3.2E-01        | 1.12 (0.90-1.38)               | 3.2E-01        | 29111        | 810      | 2963          | 90       |
| <i>BRCA2</i>  | 1.05 (0.90-1.23)        | 5.6E-01        | 1.00 (0.86-1.17)               | 9.8E-01        | 28203        | 1591     | 2854          | 167      |
| <i>CHEK2</i>  | 1.26 (0.97-1.63)        | 8.5E-02        | 1.20 (0.92-1.55)               | 1.8E-01        | 29171        | 505      | 2954          | 62       |
| <i>PALB2</i>  | 1.18 (0.88-1.59)        | 2.7E-01        | 1.13 (0.84-1.52)               | 4.0E-01        | 29657        | 387      | 3014          | 47       |
| <i>RAD51C</i> | 1.02 (0.58-1.81)        | 9.3E-01        | 1.10 (0.62-1.96)               | 7.4E-01        | 30078        | 115      | 3077          | 12       |
| <i>RAD51D</i> | 0.88 (0.46-1.67)        | 7.0E-01        | 0.82 (0.44-1.56)               | 5.5E-01        | 30097        | 98       | 3077          | 9        |
| <i>TP53</i>   | <b>1.98 (1.32-2.98)</b> | <b>9.8E-04</b> | <b>1.68 (1.12-2.50)</b>        | <b>1.1E-02</b> | 30080        | 139      | 3061          | 29       |

Abbreviations: No. = number; BC = breast cancer; HR = hazard ratio; CI = confidence interval; P = p-value.

Women who developed a CBC before study entry are excluded. The analysis for each gene excluded carriers of protein-truncating variants in that gene. Statistically significant associations ( $P < 5E-02$ ) are highlighted in bold.

<sup>a</sup> Adjusted analyses were performed by including age at diagnosis, nodal status, size category, grade, estrogen receptor (ER) status, ERB-B2 receptor tyrosine kinase 2 (*ERBB2*) status of the first breast cancer, (neo)adjuvant chemotherapy, endocrine therapy and trastuzumab as covariates in the Cox regression model.

**Table S33. Association of protein-truncating variants in 25 putative breast cancer genes with breast cancer-specific survival.**

| Gene            | Unadjusted analyses |         | Adjusted analyses <sup>a</sup> |         | No. of women |          | No. of BC deaths |          |
|-----------------|---------------------|---------|--------------------------------|---------|--------------|----------|------------------|----------|
|                 | HR (95%CI)          | P       | HR (95%CI)                     | P       | Non-carriers | Carriers | Non-carriers     | Carriers |
| <i>ABRAXAS1</i> | 0.66 (0.11-4.14)    | 6.6E-01 | 0.79 (0.12-5.31)               | 8.1E-01 | 34389        | 12       | 3448             | 1        |
| <i>AKT1</i>     | NA                  | NA      | NA                             | NA      | 34398        | 3        | 3449             | 0        |
| <i>BABAM2</i>   | 5.01 (1.20-21.03)   | 2.8E-02 | 7.74 (1.67-35.84)              | 8.8E-03 | 34394        | 7        | 3446             | 3        |
| <i>BRIP1</i>    | 1.88 (0.97-3.61)    | 6.0E-02 | 1.89 (0.97-3.67)               | 6.0E-02 | 34341        | 60       | 3438             | 11       |
| <i>CDH1</i>     | NA                  | NA      | NA                             | NA      | 34395        | 6        | 3449             | 0        |
| <i>EPCAM</i>    | NA                  | NA      | NA                             | NA      | 34393        | 8        | 3449             | 0        |
| <i>FANCC</i>    | 0.79 (0.34-1.83)    | 5.8E-01 | 0.84 (0.36-1.99)               | 7.0E-01 | 34342        | 59       | 3444             | 5        |
| <i>FANCM</i>    | 1.45 (1.03-2.06)    | 3.6E-02 | 1.33 (0.94-1.88)               | 1.1E-01 | 34139        | 262      | 3413             | 36       |
| <i>GEN1</i>     | 2.73 (1.07-6.93)    | 3.5E-02 | 2.15 (0.86-5.35)               | 1.0E-01 | 34379        | 22       | 3443             | 6        |
| <i>MEN1</i>     | NA                  | NA      | NA                             | NA      | 34398        | 3        | 3449             | 0        |
| <i>MLH1</i>     | NA                  | NA      | NA                             | NA      | 34398        | 3        | 3449             | 0        |
| <i>MRE11A</i>   | 1.14 (0.42-3.09)    | 8.0E-01 | 1.46 (0.51-4.15)               | 4.8E-01 | 34366        | 35       | 3445             | 4        |
| <i>MSH2</i>     | 2.63 (0.71-9.78)    | 1.5E-01 | 3.09 (0.77-12.33)              | 1.1E-01 | 34390        | 11       | 3446             | 3        |
| <i>MSH6</i>     | 0.38 (0.07-1.96)    | 2.5E-01 | 0.31 (0.06-1.48)               | 1.4E-01 | 34373        | 28       | 3448             | 1        |
| <i>MUTYH</i>    | 0.43 (0.08-2.35)    | 3.3E-01 | 0.48 (0.08-2.68)               | 4.0E-01 | 34372        | 29       | 3448             | 1        |
| <i>NBN</i>      | 1.20 (0.61-2.37)    | 5.9E-01 | 0.95 (0.50-1.83)               | 8.8E-01 | 34318        | 83       | 3440             | 9        |
| <i>NF1</i>      | 0.94 (0.24-3.73)    | 9.3E-01 | 0.93 (0.24-3.68)               | 9.2E-01 | 34381        | 20       | 3447             | 2        |
| <i>PIK3CA</i>   | NA                  | NA      | NA                             | NA      | 34395        | 6        | 3449             | 0        |
| <i>PMS2</i>     | 1.50 (0.53-4.26)    | 4.5E-01 | 1.06 (0.39-2.86)               | 9.1E-01 | 34374        | 27       | 3445             | 4        |
| <i>PTEN</i>     | NA                  | NA      | NA                             | NA      | 34386        | 15       | 3449             | 0        |
| <i>RAD50</i>    | 1.08 (0.55-2.09)    | 8.3E-01 | 1.24 (0.63-2.44)               | 5.4E-01 | 34305        | 96       | 3440             | 9        |
| <i>RECQL</i>    | 1.37 (0.54-3.45)    | 5.0E-01 | 1.66 (0.64-4.32)               | 3.0E-01 | 34358        | 43       | 3444             | 5        |
| <i>RINT1</i>    | 0.52 (0.15-1.88)    | 3.2E-01 | 0.72 (0.19-2.77)               | 6.4E-01 | 34376        | 25       | 3447             | 2        |
| <i>STK11</i>    | NA                  | NA      | NA                             | NA      | 34399        | 2        | 3449             | 0        |
| <i>XRCC2</i>    | 1.17 (0.16-8.73)    | 8.8E-01 | 1.14 (0.15-8.61)               | 9.0E-01 | 34391        | 10       | 3448             | 1        |

Abbreviations: No. = number; BC = breast cancer; HR = hazard ratio; CI = confidence interval; P = p-value.

Analyses included women from 34 studies listed in Table S1. Women who developed a CBC before study entry are excluded. NA: not assessable due to absence of mutation carriers with events.

Genes on the BRIDGES panel (Dorling et al., NEJM 2021) other than *ATM*, *BARD1*, *BRCA1*, *BRCA2*, *CHEK2*, *PALB2*, *RAD51C*, *RAD51D*, and *TP53* are presented here.

<sup>a</sup> Adjusted analyses were performed by including age at diagnosis, nodal status, size category, grade, estrogen receptor (ER) status, ERB-B2 receptor tyrosine kinase 2 (*ERBB2*) status of the first breast cancer, (neo)adjuvant chemotherapy, endocrine therapy and trastuzumab as covariates in the Cox regression model.

**Table S34. Association of protein-truncating variants in 25 putative breast cancer genes with breast cancer-specific survival in women diagnosed with ER-positive first breast cancer.**

| Gene            | Unadjusted analyses |         | Adjusted analyses <sup>a</sup> |         | No. of women |          | No. of BC deaths |          |
|-----------------|---------------------|---------|--------------------------------|---------|--------------|----------|------------------|----------|
|                 | HR (95%CI)          | P       | HR (95%CI)                     | P       | Non-carriers | Carriers | Non-carriers     | Carriers |
| <i>ABRAXAS1</i> | NA                  | NA      | NA                             | NA      | 22584        | 6        | 1997             | 0        |
| <i>AKT1</i>     | NA                  | NA      | NA                             | NA      | 22587        | 3        | 1997             | 0        |
| <i>BABAM2</i>   | 6.91 (1.56-30.71)   | 1.1E-02 | 10.07 (2.11-47.97)             | 3.7E-03 | 22585        | 5        | 1994             | 3        |
| <i>BRIP1</i>    | 2.13 (0.86-5.24)    | 1.0E-01 | 2.05 (0.83-5.08)               | 1.2E-01 | 22559        | 31       | 1991             | 6        |
| <i>CDH1</i>     | NA                  | NA      | NA                             | NA      | 22586        | 4        | 1997             | 0        |
| <i>EPCAM</i>    | NA                  | NA      | NA                             | NA      | 22584        | 6        | 1997             | 0        |
| <i>FANCC</i>    | 0.36 (0.07-1.84)    | 2.2E-01 | 0.39 (0.07-2.07)               | 2.7E-01 | 22557        | 33       | 1996             | 1        |
| <i>FANCM</i>    | 1.47 (0.93-2.32)    | 1.0E-01 | 1.31 (0.84-2.07)               | 2.4E-01 | 22432        | 158      | 1976             | 21       |
| <i>GEN1</i>     | 1.65 (0.37-7.40)    | 5.2E-01 | 1.30 (0.30-5.57)               | 7.2E-01 | 22577        | 13       | 1995             | 2        |
| <i>MEN1</i>     | NA                  | NA      | NA                             | NA      | 22587        | 3        | 1997             | 0        |
| <i>MLH1</i>     | NA                  | NA      | NA                             | NA      | 22588        | 2        | 1997             | 0        |
| <i>MRE11A</i>   | 1.63 (0.48-5.54)    | 4.4E-01 | 2.31 (0.63-8.40)               | 2.1E-01 | 22567        | 23       | 1994             | 3        |
| <i>MSH2</i>     | 2.87 (0.29-28.72)   | 3.7E-01 | 2.36 (0.25-22.3)               | 4.5E-01 | 22585        | 5        | 1996             | 1        |
| <i>MSH6</i>     | 0.68 (0.11-4.29)    | 6.9E-01 | 0.62 (0.10-3.82)               | 6.1E-01 | 22572        | 18       | 1996             | 1        |
| <i>MUTYH</i>    | NA                  | NA      | NA                             | NA      | 22569        | 21       | 1997             | 0        |
| <i>NBN</i>      | 1.04 (0.43-2.53)    | 9.2E-01 | 0.93 (0.39-2.24)               | 8.8E-01 | 22528        | 62       | 1992             | 5        |
| <i>NF1</i>      | 0.70 (0.11-4.43)    | 7.0E-01 | 0.71 (0.11-4.58)               | 7.2E-01 | 22578        | 12       | 1996             | 1        |
| <i>PIK3CA</i>   | NA                  | NA      | NA                             | NA      | 22586        | 4        | 1997             | 0        |
| <i>PMS2</i>     | NA                  | NA      | NA                             | NA      | 22571        | 19       | 1997             | 0        |
| <i>PTEN</i>     | NA                  | NA      | NA                             | NA      | 22583        | 7        | 1997             | 0        |
| <i>RAD50</i>    | 1.10 (0.45-2.67)    | 8.4E-01 | 1.14 (0.46-2.81)               | 7.8E-01 | 22531        | 59       | 1992             | 5        |
| <i>RECQL</i>    | 1.25 (0.38-4.03)    | 7.1E-01 | 1.24 (0.38-4.04)               | 7.2E-01 | 22560        | 30       | 1994             | 3        |
| <i>RINT1</i>    | 0.92 (0.22-3.83)    | 9.1E-01 | 1.28 (0.29-5.56)               | 7.4E-01 | 22572        | 18       | 1995             | 2        |
| <i>STK11</i>    | NA                  | NA      | NA                             | NA      | 22589        | 1        | 1997             | 0        |
| <i>XRCC2</i>    | NA                  | NA      | NA                             | NA      | 22585        | 5        | 1997             | 0        |

Abbreviations: No. = number; BC = breast cancer; HR = hazard ratio; CI = confidence interval; P = p-value.

Analyses included women from 34 studies listed in Table S1. Women who developed a CBC before study entry are excluded. NA: not assessable due to absence of mutation carriers with events. Genes on the BRIDGES panel (Dorling et al., NEJM 2021) other than *ATM*, *BARD1*, *BRCA1*, *BRCA2*, *CHEK2*, *PALB2*, *RAD51C*, *RAD51D*, and *TP53* are presented here.

<sup>a</sup> Adjusted analyses were performed by including age at diagnosis, nodal status, size category, grade, ERB-B2 receptor tyrosine kinase 2 (*ERBB2*) status of the first breast cancer, (neo)adjuvant chemotherapy, endocrine therapy and trastuzumab as covariates in the Cox regression model.

**Table S35. Association of protein-truncating variants in 25 putative breast cancer genes with breast cancer-specific survival in women diagnosed with ER-negative first breast cancer.**

| Gene            | Unadjusted analyses      |                | Adjusted analyses <sup>a</sup> |         | No. of women |          | No. of BC deaths |          |
|-----------------|--------------------------|----------------|--------------------------------|---------|--------------|----------|------------------|----------|
|                 | HR (95%CI)               | P              | HR (95%CI)                     | P       | Non-carriers | Carriers | Non-carriers     | Carriers |
| <i>ABRAXAS1</i> | NA                       | NA             | NA                             | NA      | 5663         | 2        | 834              | 0        |
| <i>AKT1</i>     | NA                       | NA             | NA                             | NA      | 5665         | 0        | 834              | 0        |
| <i>BABAM2</i>   | NA                       | NA             | NA                             | NA      | 5665         | 0        | 834              | 0        |
| <i>BRIP1</i>    | 3.51 (1.06-11.60)        | 4.0E-02        | 4.97 (1.42-17.43)              | 1.2E-02 | 5653         | 12       | 830              | 4        |
| <i>CDH1</i>     | NA                       | NA             | NA                             | NA      | 5663         | 2        | 834              | 0        |
| <i>EPCAM</i>    | NA                       | NA             | NA                             | NA      | 5664         | 1        | 834              | 0        |
| <i>FANCC</i>    | 0.98 (0.32-3.05)         | 9.8E-01        | 1.31 (0.39-4.34)               | 6.6E-01 | 5648         | 17       | 831              | 3        |
| <i>FANCM</i>    | 0.89 (0.43-1.84)         | 7.5E-01        | 0.82 (0.39-1.69)               | 5.9E-01 | 5609         | 56       | 827              | 7        |
| <i>GEN1</i>     | <b>8.79 (2.32-33.31)</b> | <b>1.4E-03</b> | 7.41 (1.99-27.66)              | 2.9E-03 | 5660         | 5        | 830              | 4        |
| <i>MEN1</i>     | NA                       | NA             | NA                             | NA      | 5665         | 0        | 834              | 0        |
| <i>MLH1</i>     | NA                       | NA             | NA                             | NA      | 5664         | 1        | 834              | 0        |
| <i>MRE11A</i>   | 0.76 (0.12-4.92)         | 7.7E-01        | 0.80 (0.12-5.38)               | 8.2E-01 | 5657         | 8        | 833              | 1        |
| <i>MSH2</i>     | 1.40 (0.18-11.10)        | 7.5E-01        | 2.74 (0.26-29.39)              | 4.0E-01 | 5662         | 3        | 833              | 1        |
| <i>MSH6</i>     | NA                       | NA             | NA                             | NA      | 5656         | 9        | 834              | 0        |
| <i>MUTYH</i>    | 1.84 (0.21-16.06)        | 5.8E-01        | 1.65 (0.19-14.07)              | 6.5E-01 | 5659         | 6        | 833              | 1        |
| <i>NBN</i>      | 1.32 (0.40-4.33)         | 6.5E-01        | 0.91 (0.30-2.80)               | 8.7E-01 | 5650         | 15       | 831              | 3        |
| <i>NF1</i>      | NA                       | NA             | NA                             | NA      | 5661         | 4        | 834              | 0        |
| <i>PIK3CA</i>   | NA                       | NA             | NA                             | NA      | 5665         | 0        | 834              | 0        |
| <i>PMS2</i>     | 1.86 (0.21-16.23)        | 5.8E-01        | 2.92 (0.29-29.74)              | 3.6E-01 | 5662         | 3        | 833              | 1        |
| <i>PTEN</i>     | NA                       | NA             | NA                             | NA      | 5663         | 2        | 834              | 0        |
| <i>RAD50</i>    | 0.42 (0.08-2.29)         | 3.2E-01        | 0.64 (0.10- 4.00)              | 6.4E-01 | 5647         | 18       | 833              | 1        |
| <i>RECQL</i>    | 4.64 (0.82-26.45)        | 8.4E-02        | 4.34 (0.76-24.73)              | 9.8E-02 | 5658         | 7        | 832              | 2        |
| <i>RINT1</i>    | NA                       | NA             | NA                             | NA      | 5663         | 2        | 834              | 0        |
| <i>STK11</i>    | NA                       | NA             | NA                             | NA      | 5665         | 0        | 834              | 0        |
| <i>XRCC2</i>    | 2.40 (0.25-22.82)        | 4.5E-01        | 2.00 (0.21-19.33)              | 5.5E-01 | 5661         | 4        | 833              | 1        |

Abbreviations: No. = number; BC = breast cancer; HR = hazard ratio; CI = confidence interval; P = p-value.

Analyses included women from 34 studies listed in Table S1. Women who developed a CBC before study entry are excluded.

Statistically significant associations after Bonferroni correction for 25 tests ( $P < 2E-03$ ) are highlighted in bold. NA: not assessable due to absence of mutation carriers with events. Genes on the BRIDGES panel (Dorling et al., NEJM 2021) other than *ATM*, *BARD1*, *BRCA1*, *BRCA2*, *CHEK2*, *PALB2*, *RAD51C*, *RAD51D*, and *TP53* are presented here. <sup>a</sup> Adjusted analyses were performed by including age at diagnosis, nodal status, size category, grade, ERB-B2 receptor tyrosine kinase 2 (*ERBB2*) status of the first breast cancer, (neo)adjuvant chemotherapy, endocrine therapy and trastuzumab as covariates in the Cox regression model.



**Table S36. Association of rare missense variants in 25 putative breast cancer genes with breast cancer-specific survival.**

| Gene            | Unadjusted analyses |         | Adjusted analyses <sup>a</sup> |         | No. of women |          | No. of BC deaths |          |
|-----------------|---------------------|---------|--------------------------------|---------|--------------|----------|------------------|----------|
|                 | HR (95%CI)          | P       | HR (95%CI)                     | P       | Non-carriers | Carriers | Non-carriers     | Carriers |
| <i>ABRAXAS1</i> | 0.74 (0.42-1.30)    | 3.0E-01 | 0.78 (0.44-1.37)               | 3.9E-01 | 34235        | 154      | 3437             | 11       |
| <i>AKT1</i>     | 1.40 (0.80-2.43)    | 2.4E-01 | 1.57 (0.88-2.79)               | 1.2E-01 | 34298        | 100      | 3435             | 14       |
| <i>BABAM2</i>   | 0.85 (0.47-1.57)    | 6.1E-01 | 0.87 (0.47-1.60)               | 6.5E-01 | 34277        | 117      | 3436             | 10       |
| <i>BRIP1</i>    | 1.03 (0.79-1.34)    | 8.4E-01 | 1.05 (0.81-1.38)               | 7.0E-01 | 33796        | 545      | 3381             | 57       |
| <i>CDH1</i>     | 0.98 (0.72-1.34)    | 9.0E-01 | 1.03 (0.74-1.41)               | 8.8E-01 | 33992        | 403      | 3410             | 39       |
| <i>EPCAM</i>    | 1.03 (0.63-1.68)    | 9.1E-01 | 1.05 (0.64-1.72)               | 8.6E-01 | 34237        | 156      | 3433             | 16       |
| <i>FANCC</i>    | 0.97 (0.72-1.31)    | 8.6E-01 | 0.99 (0.73-1.34)               | 9.6E-01 | 33919        | 423      | 3401             | 43       |
| <i>FANCM</i>    | 0.84 (0.68-1.04)    | 1.1E-01 | 0.82 (0.66-1.01)               | 6.3E-02 | 33126        | 1013     | 3328             | 85       |
| <i>GEN1</i>     | 0.78 (0.57-1.08)    | 1.3E-01 | 0.78 (0.56-1.07)               | 1.3E-01 | 33936        | 443      | 3408             | 35       |
| <i>MEN1</i>     | 1.45 (0.77-2.71)    | 2.5E-01 | 1.53 (0.81-2.89)               | 1.9E-01 | 34312        | 86       | 3438             | 11       |
| <i>MLH1</i>     | 0.99 (0.75-1.32)    | 9.6E-01 | 0.98 (0.74-1.31)               | 9.1E-01 | 33902        | 496      | 3401             | 48       |
| <i>MRE11A</i>   | 0.98 (0.70-1.35)    | 8.8E-01 | 0.96 (0.70-1.34)               | 8.3E-01 | 33976        | 390      | 3409             | 36       |
| <i>MSH2</i>     | 1.07 (0.83-1.38)    | 6.2E-01 | 1.06 (0.82-1.37)               | 6.8E-01 | 33841        | 549      | 3385             | 61       |
| <i>MSH6</i>     | 1.23 (0.99-1.52)    | 6.7E-02 | 1.22 (0.98-1.51)               | 8.0E-02 | 33650        | 723      | 3359             | 89       |
| <i>MUTYH</i>    | 1.21 (0.89-1.64)    | 2.2E-01 | 1.17 (0.86-1.58)               | 3.2E-01 | 33979        | 393      | 3403             | 45       |
| <i>NBN</i>      | 0.95 (0.69-1.29)    | 7.2E-01 | 0.89 (0.66-1.22)               | 4.8E-01 | 33902        | 416      | 3400             | 40       |
| <i>NF1</i>      | 0.90 (0.68-1.19)    | 4.7E-01 | 0.92 (0.70-1.22)               | 5.8E-01 | 33829        | 552      | 3398             | 49       |
| <i>PIK3CA</i>   | 0.79 (0.44-1.44)    | 4.4E-01 | 0.86 (0.47-1.58)               | 6.3E-01 | 34263        | 132      | 3439             | 10       |
| <i>PMS2</i>     | 1.14 (0.90-1.44)    | 2.7E-01 | 1.13 (0.90-1.43)               | 2.9E-01 | 33758        | 616      | 3369             | 76       |
| <i>PTEN</i>     | 1.35 (0.65-2.80)    | 4.2E-01 | 1.42 (0.68-3.00)               | 3.5E-01 | 34325        | 61       | 3441             | 8        |
| <i>RAD50</i>    | 0.84 (0.66-1.06)    | 1.5E-01 | 0.88 (0.69-1.13)               | 3.2E-01 | 33583        | 722      | 3377             | 63       |
| <i>RECQL</i>    | 0.89 (0.65-1.23)    | 4.8E-01 | 0.95 (0.68-1.32)               | 7.6E-01 | 33971        | 387      | 3408             | 36       |
| <i>RINT1</i>    | 0.96 (0.72-1.27)    | 7.7E-01 | 0.96 (0.72-1.27)               | 7.7E-01 | 33864        | 512      | 3398             | 49       |
| <i>STK11</i>    | 0.93 (0.42-2.06)    | 8.7E-01 | 1.22 (0.53-2.80)               | 6.4E-01 | 34340        | 59       | 3443             | 6        |
| <i>XRCC2</i>    | 0.99 (0.58-1.67)    | 9.6E-01 | 1.13 (0.66-1.93)               | 6.6E-01 | 34248        | 143      | 3434             | 14       |

Abbreviations: No. = number; BC = breast cancer; HR = hazard ratio; CI = confidence interval; P = p-value.

Analyses included women from 34 studies listed in Table S1. Women who developed a CBC before study entry are excluded. The analysis for each gene excluded carriers of protein-truncating variants in that gene.

Genes on the BRIDGES panel (Dorling et al., NEJM 2021) other than *ATM*, *BARD1*, *BRCA1*, *BRCA2*, *CHEK2*, *PALB2*, *RAD51C*, *RAD51D*, and *TP53* are presented here.

<sup>a</sup> Adjusted analyses were performed by including age at diagnosis, nodal status, size category, grade, estrogen receptor (ER) status, ERB-B2 receptor tyrosine kinase 2 (*ERBB2*) status of the first breast cancer, (neo)adjuvant chemotherapy, endocrine therapy and trastuzumab as covariates in the Cox regression model.

**Table S37. Association of rare missense variants in 25 putative breast cancer genes with breast cancer-specific survival in women diagnosed with ER-positive first breast cancer.**

| Gene            | Unadjusted analyses |         | Adjusted analyses <sup>a</sup> |         | No. of women |          | No. of BC deaths |          |
|-----------------|---------------------|---------|--------------------------------|---------|--------------|----------|------------------|----------|
|                 | HR (95%CI)          | P       | HR (95%CI)                     | P       | Non-carriers | Carriers | Non-carriers     | Carriers |
| <i>ABRAXAS1</i> | 0.72 (0.36-1.46)    | 3.6E-01 | 0.76 (0.38-1.56)               | 4.6E-01 | 22471        | 113      | 1990             | 7        |
| <i>AKT1</i>     | 1.28 (0.56-2.96)    | 5.6E-01 | 1.41 (0.60-3.35)               | 4.3E-01 | 22533        | 54       | 1991             | 6        |
| <i>BABAM2</i>   | 0.27 (0.09-0.82)    | 2.0E-02 | 0.28 (0.09-0.83)               | 2.3E-02 | 22508        | 77       | 1992             | 2        |
| <i>BRIP1</i>    | 0.98 (0.69-1.40)    | 9.3E-01 | 1.03 (0.72-1.47)               | 8.8E-01 | 22213        | 346      | 1960             | 31       |
| <i>CDH1</i>     | 0.83 (0.55-1.26)    | 3.8E-01 | 0.88 (0.58-1.35)               | 5.7E-01 | 22300        | 286      | 1976             | 21       |
| <i>EPCAM</i>    | 1.42 (0.76-2.65)    | 2.8E-01 | 1.37 (0.73-2.57)               | 3.2E-01 | 22493        | 91       | 1986             | 11       |
| <i>FANCC</i>    | 0.91 (0.61-1.37)    | 6.6E-01 | 0.93 (0.61-1.39)               | 7.1E-01 | 22271        | 286      | 1973             | 23       |
| <i>FANCM</i>    | 0.75 (0.57-1.00)    | 5.0E-02 | 0.75 (0.56-1.00)               | 4.8E-02 | 21773        | 659      | 1932             | 44       |
| <i>GEN1</i>     | 0.71 (0.45-1.11)    | 1.3E-01 | 0.69 (0.44-1.09)               | 1.1E-01 | 22290        | 287      | 1978             | 17       |
| <i>MEN1</i>     | 1.88 (0.87-4.04)    | 1.1E-01 | 1.83 (0.85-3.96)               | 1.2E-01 | 22530        | 57       | 1989             | 8        |
| <i>MLH1</i>     | 0.95 (0.65-1.39)    | 7.8E-01 | 0.94 (0.64-1.38)               | 7.5E-01 | 22290        | 298      | 1971             | 26       |
| <i>MRE11A</i>   | 0.78 (0.49-1.23)    | 2.8E-01 | 0.77 (0.48-1.21)               | 2.6E-01 | 22317        | 250      | 1977             | 17       |
| <i>MSH2</i>     | 1.15 (0.83-1.59)    | 3.9E-01 | 1.10 (0.79-1.51)               | 5.8E-01 | 22210        | 375      | 1957             | 39       |
| <i>MSH6</i>     | 1.25 (0.94-1.67)    | 1.3E-01 | 1.27 (0.95-1.69)               | 1.1E-01 | 22107        | 465      | 1945             | 51       |
| <i>MUTYH</i>    | 1.51 (1.03-2.21)    | 3.3E-02 | 1.40 (0.96-2.03)               | 8.1E-02 | 22325        | 244      | 1966             | 31       |
| <i>NBN</i>      | 1.01 (0.67-1.53)    | 9.5E-01 | 0.97 (0.64-1.47)               | 8.8E-01 | 22273        | 255      | 1969             | 23       |
| <i>NF1</i>      | 0.78 (0.54-1.13)    | 1.9E-01 | 0.77 (0.53-1.11)               | 1.6E-01 | 22200        | 378      | 1970             | 26       |
| <i>PIK3CA</i>   | 0.70 (0.33-1.49)    | 3.5E-01 | 0.73 (0.34-1.55)               | 4.1E-01 | 22492        | 94       | 1991             | 6        |
| <i>PMS2</i>     | 1.26 (0.94-1.69)    | 1.2E-01 | 1.24 (0.93-1.67)               | 1.5E-01 | 22173        | 398      | 1948             | 49       |
| <i>PTEN</i>     | 1.53 (0.65-3.61)    | 3.3E-01 | 1.48 (0.63-3.50)               | 3.7E-01 | 22539        | 44       | 1991             | 6        |
| <i>RAD50</i>    | 0.78 (0.57-1.07)    | 1.3E-01 | 0.76 (0.55-1.04)               | 9.0E-02 | 22051        | 480      | 1956             | 36       |
| <i>RECQL</i>    | 1.06 (0.70-1.59)    | 7.9E-01 | 1.19 (0.78-1.80)               | 4.1E-01 | 22301        | 259      | 1970             | 24       |
| <i>RINT1</i>    | 0.75 (0.50-1.12)    | 1.6E-01 | 0.79 (0.53-1.18)               | 2.5E-01 | 22236        | 336      | 1973             | 22       |
| <i>STK11</i>    | 0.48 (0.14-1.63)    | 2.4E-01 | 0.72 (0.19-2.67)               | 6.2E-01 | 22548        | 41       | 1995             | 2        |
| <i>XRCC2</i>    | 0.69 (0.33-1.47)    | 3.4E-01 | 0.78 (0.36-1.69)               | 5.3E-01 | 22487        | 98       | 1991             | 6        |

Abbreviations: No. = number; BC = breast cancer; HR = hazard ratio; CI = confidence interval; P = p-value.

Analyses included from 34 studies listed in Table S1. Women who developed a CBC before study entry are excluded. The analysis for each gene excluded carriers of protein-truncating variants in that gene.

Genes on the BRIDGES panel (Dorling et al., NEJM 2021) other than *ATM*, *BARD1*, *BRCA1*, *BRCA2*, *CHEK2*, *PALB2*, *RAD51C*, *RAD51D*, and *TP53* are presented here.

<sup>a</sup> Adjusted analyses were performed by including age at diagnosis, nodal status, size category, grade, ERB-B2 receptor tyrosine kinase 2 (*ERBB2*) status of the first breast cancer, (neo)adjuvant chemotherapy, endocrine therapy and trastuzumab as covariates in the Cox regression model.

**Table S38. Association of rare missense variants in 25 putative breast cancer genes with breast cancer-specific survival in women diagnosed with ER-negative first breast cancer.**

| Gene            | Unadjusted analyses |         | Adjusted analyses <sup>a</sup> |         | No. of women |          | No. of BC deaths |          |
|-----------------|---------------------|---------|--------------------------------|---------|--------------|----------|------------------|----------|
|                 | HR (95%CI)          | P       | HR (95%CI)                     | P       | Non-carriers | Carriers | Non-carriers     | Carriers |
| <i>ABRAXAS1</i> | 0.76 (0.20-2.87)    | 6.9E-01 | 0.75 (0.20-2.85)               | 6.8E-01 | 5644         | 19       | 832              | 2        |
| <i>AKT1</i>     | 1.73 (0.72-4.16)    | 2.2E-01 | 2.23 (0.89-5.55)               | 8.6E-02 | 5644         | 21       | 828              | 6        |
| <i>BABAM2</i>   | 1.34 (0.48-3.75)    | 5.8E-01 | 1.32 (0.47-3.73)               | 6.0E-01 | 5644         | 21       | 830              | 4        |
| <i>BRIP1</i>    | 1.10 (0.64-1.88)    | 7.4E-01 | 1.17 (0.67-2.02)               | 5.8E-01 | 5551         | 102      | 816              | 14       |
| <i>CDH1</i>     | 1.27 (0.64-2.53)    | 4.9E-01 | 1.11 (0.56-2.18)               | 7.7E-01 | 5614         | 49       | 825              | 9        |
| <i>EPCAM</i>    | 0.68 (0.23-1.96)    | 4.7E-01 | 0.76 (0.25-2.25)               | 6.1E-01 | 5635         | 29       | 831              | 3        |
| <i>FANCC</i>    | 1.38 (0.83-2.29)    | 2.2E-01 | 1.37 (0.82-2.28)               | 2.3E-01 | 5577         | 71       | 814              | 17       |
| <i>FANCM</i>    | 1.12 (0.76-1.64)    | 5.8E-01 | 1.00 (0.68-1.46)               | 9.9E-01 | 5437         | 172      | 799              | 28       |
| <i>GEN1</i>     | 1.13 (0.63-2.03)    | 6.7E-01 | 1.17 (0.65-2.10)               | 6.1E-01 | 5589         | 71       | 818              | 12       |
| <i>MEN1</i>     | 1.11 (0.27-4.57)    | 8.8E-01 | 1.40 (0.32-6.21)               | 6.6E-01 | 5651         | 14       | 832              | 2        |
| <i>MLH1</i>     | 0.98 (0.56-1.74)    | 9.6E-01 | 0.87 (0.49-1.53)               | 6.3E-01 | 5568         | 96       | 822              | 12       |
| <i>MRE11A</i>   | 1.22 (0.64-2.34)    | 5.4E-01 | 1.23 (0.64-2.38)               | 5.3E-01 | 5594         | 63       | 823              | 10       |
| <i>MSH2</i>     | 0.72 (0.38-1.34)    | 2.9E-01 | 0.74 (0.39-1.39)               | 3.5E-01 | 5584         | 78       | 824              | 9        |
| <i>MSH6</i>     | 1.31 (0.84-2.03)    | 2.4E-01 | 1.24 (0.80-1.93)               | 3.4E-01 | 5541         | 115      | 812              | 22       |
| <i>MUTYH</i>    | 1.00 (0.54-1.88)    | 9.9E-01 | 1.06 (0.56-2.01)               | 8.6E-01 | 5584         | 75       | 823              | 10       |
| <i>NBN</i>      | 0.68 (0.35-1.32)    | 2.6E-01 | 0.67 (0.35-1.31)               | 2.4E-01 | 5577         | 73       | 823              | 8        |
| <i>NF1</i>      | 1.28 (0.75-2.19)    | 3.6E-01 | 1.41 (0.82-2.44)               | 2.2E-01 | 5575         | 86       | 819              | 15       |
| <i>PIK3CA</i>   | 0.74 (0.20-2.77)    | 6.5E-01 | 0.76 (0.20-2.90)               | 6.9E-01 | 5643         | 22       | 832              | 2        |
| <i>PMS2</i>     | 1.08 (0.67-1.77)    | 7.4E-01 | 1.13 (0.69-1.85)               | 6.3E-01 | 5552         | 110      | 816              | 17       |
| <i>PTEN</i>     | 0.89 (0.13-6.11)    | 9.0E-01 | 0.97 (0.13-6.96)               | 9.7E-01 | 5655         | 8        | 833              | 1        |
| <i>RAD50</i>    | 0.81 (0.44-1.48)    | 4.9E-01 | 0.96 (0.51-1.79)               | 8.9E-01 | 5554         | 93       | 823              | 10       |
| <i>RECQL</i>    | 0.64 (0.32-1.28)    | 2.1E-01 | 0.67 (0.33-1.36)               | 2.7E-01 | 5593         | 65       | 825              | 7        |
| <i>RINT1</i>    | 1.33 (0.84-2.12)    | 2.3E-01 | 1.32 (0.83-2.12)               | 2.4E-01 | 5560         | 103      | 814              | 20       |
| <i>STK11</i>    | 2.16 (0.45-10.37)   | 3.4E-01 | 2.11 (0.44-10.20)              | 3.5E-01 | 5658         | 7        | 832              | 2        |
| <i>XRCC2</i>    | 2.12 (0.92-4.90)    | 7.8E-02 | 2.34 (1 - 5.49)                | 5.1E-02 | 5638         | 23       | 826              | 7        |

Abbreviations: No. = number; BC = breast cancer; HR = hazard ratio; CI = confidence interval; P = p-value.

Analyses included women from 34 studies listed in Table S1. Women who developed a CBC before study entry are excluded. The analysis for each gene excluded carriers of protein-truncating variants in that gene.

Genes on the BRIDGES panel (Dorling et al., NEJM 2021) other than *ATM*, *BARD1*, *BRCA1*, *BRCA2*, *CHEK2*, *PALB2*, *RAD51C*, *RAD51D*, and *TP53* are presented here.

<sup>a</sup> Adjusted analyses were performed by including age at diagnosis, nodal status, size category, grade, ERB-B2 receptor tyrosine kinase 2 (*ERBB2*) status of the first breast cancer, (neo)adjuvant chemotherapy, endocrine therapy and trastuzumab as covariates in the Cox regression model.

**Table S39. Sensitivity analysis for the association of protein-truncating variants in 9 breast cancer genes and of pathogenic/likely pathogenic rare missense variants in *BRCA1*, *BRCA2* and *TP53* with breast cancer-specific survival, censoring for contralateral breast cancer.**

| Gene                              | Unadjusted analyses     |                | Adjusted analyses <sup>a</sup> |                | No. of women |          | No. of BC deaths |          |
|-----------------------------------|-------------------------|----------------|--------------------------------|----------------|--------------|----------|------------------|----------|
|                                   | HR (95%CI)              | P              | HR (95%CI)                     | P              | Non-carriers | Carriers | Non-carriers     | Carriers |
| PTVs (unless indicated otherwise) |                         |                |                                |                |              |          |                  |          |
| <i>ATM</i>                        | 1.24 (0.84-1.84)        | 2.8E-01        | 1.07 (0.73-1.58)               | 7.3E-01        | 34151        | 250      | 3303             | 27       |
| <i>BARD1</i>                      | 1.16 (0.47-2.86)        | 7.4E-01        | 0.92 (0.39-2.21)               | 8.6E-01        | 34347        | 54       | 3325             | 5        |
| <i>BRCA1</i> <sup>b</sup>         | 1.29 (0.94-1.77)        | 1.2E-01        | 0.95 (0.70-1.30)               | 7.5E-01        | 34037        | 364      | 3288             | 42       |
| <i>BRCA2</i> <sup>b</sup>         | <b>1.51 (1.18-1.94)</b> | <b>1.1E-03</b> | 1.19 (0.93-1.51)               | 1.7E-01        | 33914        | 487      | 3258             | 72       |
| <i>CHEK2</i>                      | <b>1.41 (1.13-1.77)</b> | <b>2.4E-03</b> | <b>1.34 (1.07-1.67)</b>        | <b>1.1E-02</b> | 33702        | 699      | 3241             | 89       |
| c.1100delC                        | <b>1.39 (1.08-1.78)</b> | <b>9.2E-03</b> | <b>1.35 (1.05-1.73)</b>        | <b>1.8E-02</b> | 33702        | 561      | 3241             | 71       |
| Other                             | 1.50 (0.92-2.47)        | 1.1E-01        | 1.28 (0.79-2.08)               | 3.2E-01        | 33702        | 138      | 3241             | 18       |
| <i>PALB2</i>                      | <b>1.71 (1.18-2.47)</b> | <b>4.3E-03</b> | <b>1.45 (1.01-2.08)</b>        | <b>4.4E-02</b> | 34177        | 224      | 3296             | 34       |
| <i>RAD51C</i>                     | 0.55 (0.16-1.93)        | 3.5E-01        | 0.57 (0.16-2.01)               | 3.8E-01        | 34361        | 40       | 3328             | 2        |
| <i>RAD51D</i>                     | 1.27 (0.51-3.16)        | 6.1E-01        | 0.81 (0.35-1.89)               | 6.2E-01        | 34370        | 31       | 3325             | 5        |
| <i>TP53</i> <sup>b</sup>          | <b>2.80 (1.24-6.30)</b> | <b>1.3E-02</b> | <b>2.32 (1.04-5.16)</b>        | <b>4.0E-02</b> | 34354        | 47       | 3322             | 8        |

Abbreviations: No. = number; BC = breast cancer; PTVs = protein-truncating variants; HR = hazard ratio; CI = confidence interval; P = p-value.

Analyses included women from 34 studies listed in Table S1. Statistically significant associations ( $P < 5E-02$ ) are highlighted in bold.

<sup>a</sup>Adjusted analyses were performed by including age at diagnosis, nodal status, size category, grade, estrogen receptor (ER) status, ERB-B2 receptor tyrosine kinase 2 (*ERBB2*) status of the first breast cancer, (neo)adjuvant chemotherapy, endocrine therapy and trastuzumab as covariates in the Cox regression model.

<sup>b</sup> Combined PTVs and rare pathogenic/likely pathogenic missense variants as defined in Dorling et al. (NEJM 2021).

**Table S40. Sensitivity analysis for the association of rare missense variants in 9 breast cancer genes with breast cancer-specific survival, censoring for contralateral breast cancer.**

| Gene          | Unadjusted analyses     |                | Adjusted analyses <sup>a</sup> |                | No. of women |          | No. of BC deaths |          |
|---------------|-------------------------|----------------|--------------------------------|----------------|--------------|----------|------------------|----------|
|               | HR (95%CI)              | P              | HR (95%CI)                     | P              | Non-carriers | Carriers | Non-carriers     | Carriers |
| <i>ATM</i>    | 0.99 (0.85-1.16)        | 8.9E-01        | 0.97 (0.83-1.14)               | 7.3E-01        | 32411        | 1740     | 3138             | 165      |
| <i>BARD1</i>  | 1.19 (0.88-1.62)        | 2.6E-01        | 1.15 (0.85-1.57)               | 3.6E-01        | 33944        | 403      | 3281             | 44       |
| <i>BRCA1</i>  | 1.12 (0.91-1.37)        | 2.9E-01        | 1.11 (0.90-1.36)               | 3.4E-01        | 33160        | 921      | 3195             | 97       |
| <i>BRCA2</i>  | 1.01 (0.87-1.17)        | 9.2E-01        | 0.98 (0.84-1.14)               | 7.7E-01        | 32116        | 1833     | 3087             | 176      |
| <i>CHEK2</i>  | <b>1.29 (1.00-1.64)</b> | <b>4.6E-02</b> | 1.24 (0.97-1.59)               | 9.1E-02        | 33091        | 611      | 3171             | 70       |
| <i>PALB2</i>  | 1.10 (0.82-1.47)        | 5.3E-01        | 1.07 (0.80-1.43)               | 6.6E-01        | 33735        | 442      | 3249             | 47       |
| <i>RAD51C</i> | 1.20 (0.71-2.02)        | 5.0E-01        | 1.21 (0.72-2.05)               | 4.7E-01        | 34223        | 138      | 3313             | 15       |
| <i>RAD51D</i> | 0.82 (0.44-1.55)        | 5.4E-01        | 0.76 (0.41-1.42)               | 3.9E-01        | 34256        | 114      | 3316             | 9        |
| <i>TP53</i>   | <b>1.94 (1.32-2.86)</b> | <b>7.5E-04</b> | <b>1.70 (1.16-2.49)</b>        | <b>6.6E-03</b> | 34218        | 179      | 3297             | 32       |

Abbreviations: No. = number; BC = breast cancer; HR = hazard ratio; CI = confidence interval; P = p-value.

Analyses included women from 34 studies listed in Table S1. The analysis for each gene excluded carriers of protein-truncating variants in that gene. Statistically significant associations ( $P < 5E-02$ ) are highlighted in bold.

<sup>a</sup> Adjusted analyses were performed by including age at diagnosis, nodal status, size category, grade, estrogen receptor (ER) status, ERB-B2 receptor tyrosine kinase 2 (*ERBB2*) status of the first breast cancer, (neo)adjuvant chemotherapy, endocrine therapy and trastuzumab as covariates in the Cox regression model.



**Table S41. Association of protein-truncating variants in 9 breast cancer genes and of pathogenic/likely pathogenic rare missense variants in *BRCA1*, *BRCA2* and *TP53* with overall survival.**

| Gene                              | Unadjusted analyses     |                | Adjusted analyses <sup>a</sup> |                | No. of women |          | No. of deaths |          |
|-----------------------------------|-------------------------|----------------|--------------------------------|----------------|--------------|----------|---------------|----------|
|                                   | HR (95%CI)              | P              | HR (95%CI)                     | P              | Non-carriers | Carriers | Non-carriers  | Carriers |
| PTVs (unless indicated otherwise) |                         |                |                                |                |              |          |               |          |
| <i>ATM</i>                        | 1.25 (0.95-1.64)        | 1.1E-01        | 1.18 (0.90-1.56)               | 2.3E-01        | 34151        | 250      | 6842          | 56       |
| <i>BARD1</i>                      | 1.45 (0.83-2.53)        | 1.9E-01        | 1.30 (0.75-2.25)               | 3.6E-01        | 34347        | 54       | 6884          | 14       |
| <i>BRCA1</i> <sup>b</sup>         | 1.08 (0.87-1.34)        | 4.7E-01        | 1.20 (0.96-1.50)               | 1.1E-01        | 34037        | 364      | 6810          | 88       |
| <i>BRCA2</i> <sup>b</sup>         | <b>1.28 (1.07-1.54)</b> | <b>7.5E-03</b> | <b>1.27 (1.06-1.52)</b>        | <b>1.1E-02</b> | 33914        | 487      | 6769          | 129      |
| <i>CHEK2</i>                      | <b>1.22 (1.04-1.43)</b> | <b>1.5E-02</b> | <b>1.21 (1.03-1.43)</b>        | <b>2.0E-02</b> | 33702        | 699      | 6735          | 163      |
| c.1100delC                        | 1.15 (0.96-1.38)        | 1.4E-01        | 1.16 (0.96-1.39)               | 1.2E-01        | 33702        | 561      | 6735          | 123      |
| Other                             | <b>1.51 (1.08-2.10)</b> | <b>1.5E-02</b> | <b>1.43 (1.02-1.99)</b>        | <b>3.6E-02</b> | 33702        | 138      | 6735          | 40       |
| <i>PALB2</i>                      | 1.29 (0.98-1.69)        | 7.1E-02        | 1.18 (0.90-1.55)               | 2.2E-01        | 34177        | 224      | 6842          | 56       |
| <i>RAD51C</i>                     | 1.11 (0.55-2.26)        | 7.7E-01        | 0.98 (0.49-1.95)               | 9.5E-01        | 34361        | 40       | 6890          | 8        |
| <i>RAD51D</i>                     | 1.34 (0.67-2.66)        | 4.0E-01        | 1.08 (0.55-2.09)               | 8.3E-01        | 34370        | 31       | 6889          | 9        |
| <i>TP53</i> <sup>b</sup>          | <b>3.10 (1.79-5.36)</b> | <b>5.4E-05</b> | <b>3.47 (1.98-6.09)</b>        | <b>1.5E-05</b> | 34354        | 47       | 6880          | 18       |

Abbreviations: No. = number; PTVs = protein-truncating variants; HR = hazard ratio; CI = confidence interval; P = p-value. Analyses included women from 34 studies listed in Table S1. Women who developed a CBC before study entry are excluded. Statistically significant associations ( $P < 5E-02$ ) are highlighted in bold.

<sup>a</sup> Adjusted analyses were performed by including age at diagnosis, nodal status, size category, grade, estrogen receptor (ER) status, ERB-B2 receptor tyrosine kinase 2 (*ERBB2*) status of the first breast cancer, (neo)adjuvant chemotherapy, endocrine therapy and trastuzumab as covariates in the Cox regression model.

<sup>b</sup> Combined PTVs and rare pathogenic/likely pathogenic missense variants as defined in Dorling et al. (NEJM 2021).

**Table S42. Association of rare missense variants in 9 breast cancer genes with overall survival.**

| Gene          | Unadjusted analyses     |                | Adjusted analyses <sup>a</sup> |                | No. of women |          | No. of deaths |          |
|---------------|-------------------------|----------------|--------------------------------|----------------|--------------|----------|---------------|----------|
|               | HR (95%CI)              | P              | HR (95%CI)                     | P              | Non-carriers | Carriers | Non-carriers  | Carriers |
| <i>ATM</i>    | 0.99 (0.88-1.10)        | 8.0E-01        | 1.00 (0.90-1.12)               | 9.8E-01        | 32411        | 1740     | 6498          | 344      |
| <i>BARD1</i>  | 1.04 (0.83-1.31)        | 7.2E-01        | 1.02 (0.81-1.28)               | 8.4E-01        | 33944        | 403      | 6806          | 78       |
| <i>BRCA1</i>  | 1.04 (0.90-1.21)        | 5.9E-01        | 1.10 (0.94-1.27)               | 2.3E-01        | 33160        | 921      | 6633          | 185      |
| <i>BRCA2</i>  | 1.02 (0.92-1.13)        | 6.9E-01        | 1.02 (0.92-1.14)               | 6.8E-01        | 32116        | 1833     | 6405          | 374      |
| <i>CHEK2</i>  | 1.14 (0.96-1.37)        | 1.4E-01        | <b>1.21 (1.01-1.46)</b>        | <b>4.0E-02</b> | 33091        | 611      | 6609          | 126      |
| <i>PALB2</i>  | 1.10 (0.90-1.35)        | 3.6E-01        | 1.06 (0.86-1.30)               | 6.0E-01        | 33735        | 442      | 6748          | 94       |
| <i>RAD51C</i> | 0.94 (0.63-1.39)        | 7.5E-01        | 0.93 (0.63-1.39)               | 7.3E-01        | 34223        | 138      | 6866          | 24       |
| <i>RAD51D</i> | 0.65 (0.40-1.03)        | 6.9E-02        | <b>0.60 (0.38-0.96)</b>        | <b>3.2E-02</b> | 34256        | 114      | 6874          | 15       |
| <i>TP53</i>   | <b>1.45 (1.06-1.97)</b> | <b>1.9E-02</b> | <b>1.47 (1.08-2.00)</b>        | <b>1.5E-02</b> | 34218        | 179      | 6849          | 46       |

Abbreviations: No. = number; HR = hazard ratio; CI = confidence interval; P = p-value.

Analyses included women from 34 studies listed in Table S1. Women who developed a CBC before study entry are excluded. The analysis for each gene excluded carriers of protein-truncating variants in that gene. Statistically significant associations ( $P < 5E-02$ ) are highlighted in bold.

<sup>a</sup> Adjusted analyses were performed by including age at diagnosis, nodal status, size category, grade, estrogen receptor (ER) status, ERB-B2 receptor tyrosine kinase 2 (*ERBB2*) status of the first breast cancer, (neo)adjuvant chemotherapy, endocrine therapy and trastuzumab as covariates in the Cox regression model.

## Supplementary methods

### Rare missense variants calling and analyses

Rare missense variants (MSVs) identified in the BRIDGES study<sup>1</sup> were analyzed in aggregate, by gene. For *BRCA1*, *BRCA2* and *TP53*, subsets of rare MSVs were also considered, which were likely to be considered pathogenic according to commonly accepted guidelines as described previously<sup>1</sup>. More specifically, for *BRCA1* and *BRCA2*, MSVs were classified as pathogenic or likely pathogenic by either ClinVar (<https://www.ncbi.nlm.nih.gov/clinvar/>) or the ENIGMA *BRCA1/2* expert panel guidelines (<https://enigmaconsortium.org/>). For *TP53*, additional definitions of (likely) pathogenic, based on *TP53* Variant Curation Expert Panel Specifications<sup>2</sup> of the American College of Medical Genetics (ACMG) guidelines<sup>3</sup>, and on a published quantitative model for *TP53* missense variant<sup>4</sup> were also used.

### Definition of contralateral breast cancer and survival

Primary second tumors were defined by individual studies. In particular, data on laterality was collected by individual studies and reported to the central Breast Cancer Association Consortium (BCAC) database. Information about follow-up, including vital status was also collected by individual studies. Table S1 provides, for each included study, information on: 1) how follow-up (including vital status) information was obtained; 2) how disease recurrence/progression was obtained; 3) how information on contralateral breast cancer was obtained and how it was defined; and 4) when the most recent attempt to have

complete follow-up was. Sources of data varied across studies but mostly came from medical records. A variable in the central BCAC database indicates, for women who died, whether death was due to breast cancer, to other causes, or whether it was unknown, at least in the study database.

#### Multiple imputation of missing data

Multiple imputation was performed to address the presence of missing data in several clinical and pathological variables included as covariates in the multivariable Cox regression models. The R package MICE (version 3.13.0) was used to impute 10 datasets through 30 iterations of the multivariate imputation by chained equations (MICE) algorithm. Imputation was performed on a total of 35232 women with available vital status and number of years from diagnosis of the first breast cancer to last follow-up (Table S4).

The list of imputed variables, corresponding percentage of missing values, imputation methods, and information about pre-processing of the data can be found in Table S5. Variables included in the imputation process were imputed according to the number of missing values, from the least to the most missing.

For each imputed variable, predictors in the corresponding imputation model were selected among all the variables included in the imputation process based on the correlation coefficient with the variable to impute ( $\geq 0.125$ ) and the proportion of observed values among the cases with missing data on the variable to impute ( $\geq 0.200$ ). In particular, neo-adjuvant chemotherapy status (yes vs no) was added as predictor in the imputation models of neoadjuvant anthracyclines status, neoadjuvant taxanes status and neoadjuvant CMF-like chemotherapy status. Year of diagnosis was included as predictor in the imputation models of (neo)adjuvant chemotherapy status (yes vs no), adjuvant

endocrine therapy status (yes vs no), and adjuvant trastuzumab status (yes vs no). The variable “study” was included in all imputation models, in order to preserve the heterogeneity among studies as much as possible, and because in case of systematic missing values (variables not measured/reported by entire studies) it is an informative predictor, which needs to be included to fulfill the missing at random assumption<sup>5</sup>.

The Nelson-Aalen estimator of the baseline cumulative hazard and the event indicator of breast cancer-specific survival and overall survival were included in all imputation models to improve imputation, as well as the time to contralateral breast cancer (CBC) and the corresponding event indicator <sup>6</sup>. Due to the presence of missing values, time to CBC and corresponding event indicator were also imputed, but the imputed values for these two variables were not used in the adjusted CBC risk analyses, which were based only on women with observed CBC status and time to CBC recorded.

Estimates from the analyses across different imputed datasets were combined via Rubin’s rule <sup>7,8</sup>.

### Heterogeneity of hazard ratio (HR) estimates for ER-positive and ER-negative first breast cancer

Heterogeneity of the HR estimates for the carrier status by ER status of the first BC was tested in both unadjusted analyses and analyses adjusted for first BC tumor characteristics (size, grade, lymph node status, ERB-B2 receptor tyrosine kinase 2 (ERBB2, MIM: 164870) status), age at diagnosis and systemic treatment (endocrine therapy, (neo)adjuvant chemotherapy and trastuzumab). For HR estimates from the unadjusted analyses, the heterogeneity test was performed by comparing a model

including the main effects and an interaction term between carrier status and the ER status of the first BC (full model), with a model without the interaction term (reduced model), using a likelihood ratio test via the “anova” function in R. For HR estimates from the adjusted analyses, the full and reduced model compared additionally included size, grade, lymph node status, age at diagnosis of the first BC, endocrine therapy, (neo)adjuvant chemotherapy and trastuzumab as covariates and were compared via the D1-statistic (multivariate Wald test) across multiply imputed datasets <sup>9</sup>, using the R package MICE (version 3.13.0).

#### CBC risk analyses by age at first BC diagnosis for *BRCA1*, *BRCA2*, *TP53*

Unadjusted CBC analyses were performed separately for combined PTVs and pathogenic/likely pathogenic MSVs in *BRCA1*, *BRCA2*, and in *TP53*, within subgroups of women diagnosed with first BC at age younger than 40 years and at age equal or older than 40 years. Heterogeneity of the HR estimates for the carrier status by age at diagnosis of the first BC was tested by comparing a model including the main effects and an interaction term between carrier status and a binary variable for age at first BC diagnosis with categories “< 40 years” and “≥ 40 years” (full model), with a model without the interaction term (reduced model), using a likelihood ratio test via the “anova” function in R.

### CBC cumulative incidence estimation

CBC cumulative incidence estimates for carriers and non-carriers of PTVs in *ATM*, *BARD1*, *CHEK2*, *PALB2*, *RAD51C*, and *RAD51D*, and pathogenic/likely pathogenic MSVs in *BRCA1*, *BRCA2* and *TP53*, accounting for death from any cause as competing event, were computed using the R package “survival”<sup>10,11</sup> as explained in the vignette “Multi-state models and competing risks” available at <https://CRAN.R-project.org/package=survival>.

## **Supplemental Acknowledgments**

### **Funding**

BCAC is funded by the European Union's Horizon 2020 Research and Innovation Programme (grant numbers 634935 and 633784 for BRIDGES and B-CAST respectively), and the PERSPECTIVE I&I project, funded by the Government of Canada through Genome Canada and the Canadian Institutes of Health Research, the Ministère de l'Économie et de l'Innovation du Québec through Genome Québec, the Quebec Breast Cancer Foundation. The EU Horizon 2020 Research and Innovation Programme funding source had no role in study design, data collection, data analysis, data interpretation or writing of the report. Additional funding for BCAC is provided via the Confluence project which is funded with intramural funds from the National Cancer Institute Intramural Research Program, National Institutes of Health.

The BRIDGES panel sequencing was supported by the European Union Horizon 2020 research and innovation program BRIDGES (grant number, 634935) and the Wellcome Trust (v203477/Z/16/Z).

The ABCS study was supported by the Dutch Cancer Society [grants NKI 2007-3839; 2009 4363]. The work of the BBCC was partly funded by ELAN-Fond of the University Hospital of Erlangen. For BIGGS, ES is supported by NIHR Comprehensive Biomedical Research Centre, Guy's & St. Thomas' NHS Foundation Trust in partnership with King's College London, United Kingdom. IT is supported by the Oxford Biomedical Research Centre. The BREast Oncology GALician Network (BREGAN) is funded by Acción Estratégica de Salud del Instituto de Salud Carlos III FIS PI12/02125/Cofinanciado and



FEDER PI17/00918/Cofinanciado FEDER; Acción Estratégica de Salud del Instituto de Salud Carlos III FIS Intrasalud (PI13/01136); Programa Grupos Emergentes, Cancer Genetics Unit, Instituto de Investigación Biomedica Galicia Sur. Xerencia de Xestión Integrada de Vigo-SERGAS, Instituto de Salud Carlos III, Spain; Grant 10CSA012E, Consellería de Industria Programa Sectorial de Investigación Aplicada, PEME I + D e I + D Suma del Plan Gallego de Investigación, Desarrollo e Innovación Tecnológica de la Consellería de Industria de la Xunta de Galicia, Spain; Grant EC11-192. Fomento de la Investigación Clínica Independiente, Ministerio de Sanidad, Servicios Sociales e Igualdad, Spain; and Grant FEDER-Innterconecta. Ministerio de Economía y Competitividad, Xunta de Galicia, Spain. The BSUCH study was supported by the Dietmar-Hopp Foundation, the Helmholtz Society and the German Cancer Research Center (DKFZ). CCGP is supported by funding from the University of Crete. The CECILE study was supported by Fondation de France, Institut National du Cancer (INCa), Ligue Nationale contre le Cancer, Agence Nationale de Sécurité Sanitaire, de l'Alimentation, de l'Environnement et du Travail (ANSES), Agence Nationale de la Recherche (ANR). The CGPS was supported by the Chief Physician Johan Boserup and Lise Boserup Fund, the Danish Medical Research Council, and Herlev and Gentofte Hospital. FHRISK and PROCAS are funded from NIHR grant PGfAR 0707-10031. DGE, AH and WGN are supported by the NIHR Manchester Biomedical Research Centre (IS-BRC-1215-20007). The GC-HBOC (German Consortium of Hereditary Breast and Ovarian Cancer) is supported by the German Cancer Aid (grant no 110837 and 70114178, coordinator: Rita K. Schmutzler, Cologne) and the Federal Ministry of Education and Research (BMBF), Germany (grant no 01GY1901). This work was also funded by the European Regional Development Fund and Free State of Saxony, Germany (LIFE - Leipzig Research Centre

for Civilization Diseases, project numbers 713-241202, 713-241202, 14505/2470, 14575/2470). The GENICA was funded by the Federal Ministry of Education and Research (BMBF) Germany grants 01KW9975/5, 01KW9976/8, 01KW9977/0 and 01KW0114, the Robert Bosch Foundation, Stuttgart, Deutsches Krebsforschungszentrum (DKFZ), Heidelberg, the Institute for Prevention and Occupational Medicine of the German Social Accident Insurance, Institute of the Ruhr University Bochum (IPA), Bochum, as well as the Department of Internal Medicine, Johanniter GmbH Bonn, Johanniter Krankenhaus, Bonn, Germany. The GESBC was supported by the Deutsche Krebshilfe e. V. [70492] and the German Cancer Research Center (DKFZ). The HABCS study was supported by the Claudia von Schilling Foundation for Breast Cancer Research, by the Lower Saxonian Cancer Society, and by the Rudolf Bartling Foundation. The HEBCS was financially supported by the Helsinki University Hospital Research Fund, the Sigrid Juselius Foundation and the Cancer Foundation Finland. Financial support for KARBAC was provided through the regional agreement on medical training and clinical research (ALF) between Stockholm County Council and Karolinska Institutet, the Swedish Cancer Society, The Gustav V Jubilee foundation and Bert von Kantzows foundation. The KARMA study was supported by Märit and Hans Rausings Initiative Against Breast Cancer. The KBCP was financially supported by the special Government Funding (VTR) of Kuopio University Hospital grants, Cancer Fund of North Savo, the Finnish Cancer Organizations, and by the strategic funding of the University of Eastern Finland. kConFab is supported by a grant from the National Breast Cancer Foundation, and previously by the National Health and Medical Research Council (NHMRC), the Queensland Cancer Fund, the Cancer Councils of New South Wales, Victoria, Tasmania and South Australia, and the Cancer Foundation of Western Australia. Financial support for the AOCS was provided

by the United States Army Medical Research and Materiel Command [DAMD17-01-1-0729], Cancer Council Victoria, Queensland Cancer Fund, Cancer Council New South Wales, Cancer Council South Australia, The Cancer Foundation of Western Australia, Cancer Council Tasmania and the National Health and Medical Research Council of Australia (NHMRC; 400413, 400281, 199600). G.C.T. and P.W. are supported by the NHMRC. RB was a Cancer Institute NSW Clinical Research Fellow. The MARIE study was supported by the Deutsche Krebshilfe e.V. [70-2892-BR I, 106332, 108253, 108419, 110826, 110828], the Hamburg Cancer Society, the German Cancer Research Center (DKFZ) and the Federal Ministry of Education and Research (BMBF) Germany [01KH0402]. MBCSG is supported by grants from the Italian Association for Cancer Research (AIRC). The Melbourne Collaborative Cohort Study (MCCS) cohort recruitment was funded by VicHealth and Cancer Council Victoria. The MCCS was further augmented by Australian National Health and Medical Research Council grants 209057, 396414 and 1074383 and by infrastructure provided by Cancer Council Victoria. Cases and their vital status were ascertained through the Victorian Cancer Registry and the Australian Institute of Health and Welfare, including the National Death Index and the Australian Cancer Database. The NBCS has received funding from the K.G. Jebsen Centre for Breast Cancer Research; the Research Council of Norway grant 193387/V50 (to A-L Børresen-Dale and V.N. Kristensen) and grant 193387/H10 (to A-L Børresen-Dale and V.N. Kristensen), South Eastern Norway Health Authority (grant 39346 to A-L Børresen-Dale) and the Norwegian Cancer Society (to A-L Børresen-Dale and V.N. Kristensen). The OFBCR was supported by a grant from the U.S. National Cancer Institute (UM1 CA164920) to the Breast Cancer Family Registry (BCFR). The content of this manuscript does not necessarily reflect the views or policies of the National Cancer Institute, nor does

mention of trade names, commercial products, or organizations imply endorsement by the U.S. Government or the BCFR. The PBCS was funded by Intramural Research Funds of the National Cancer Institute, Department of Health and Human Services, USA. Genotyping for PLCO was supported by the Intramural Research Program of the National Institutes of Health, NCI, Division of Cancer Epidemiology and Genetics. The PLCO is supported by the Intramural Research Program of the Division of Cancer Epidemiology and Genetics and supported by contracts from the Division of Cancer Prevention, National Cancer Institute, National Institutes of Health. The RBCS was funded by the Dutch Cancer Society (DDHK 2004-3124, DDHK 2009-4318). The SASBAC study was supported by funding from the Agency for Science, Technology and Research of Singapore (A\*STAR), the US National Institute of Health (NIH) and the Susan G. Komen Breast Cancer Foundation. SEARCH is funded by Cancer Research UK [C490/A10124, C490/A16561] and supported by the UK National Institute for Health Research Biomedical Research Centre at the University of Cambridge. The University of Cambridge has received salary support for PDPP from the NHS in the East of England through the Clinical Academic Reserve. NM and JD were supported by the CR-UK funding (Grant number PPRPGM-Nov20\100002). SKKDKFZS is supported by the DKFZ. The SZBCS was supported by Grant PBZ\_KBN\_122/P05/2004 and the program of the Minister of Science and Higher Education under the name "Regional Initiative of Excellence" in 2019-2022 project number 002/RID/2018/19 amount of financing 12 000 000 PLN. UBCS was supported by funding from National Cancer Institute (NCI) grant R01 CA163353 (to N.J. Camp) and the Women's Cancer Center at the Huntsman Cancer Institute (HCI). Data collection for UBCS was supported by the Utah Population Database (UPDB) and Utah Cancer Registry (UCR). The UPDB is supported by HCI (including the Huntsman Cancer Foundation),

University of Utah program in Personalized Health and Center for Clinical and Translational Science, and NCI grant P30 CA2014. The UCR is funded by the NCI's SEER Program, Contract No. HHSN261201800016I, the US Center for Disease Control and Prevention's National Program of Cancer Registries, Cooperative Agreement No. NU58DP0063200, the University of Utah and Huntsman Cancer Foundation. ABS was supported by an NHMRC Investigator Fellowship (APP177524).

## **Acknowledgements**

We thank all the individuals who took part in these studies and all the researchers, clinicians, technicians and administrative staff who have enabled this work to be carried out. We thank Dr. Cristina Fortuno for her advisory role about the *TP53* missense variants classification. ABCFS thank Maggie Angelakos, Judi Maskiell, Gillian Dite. ABCS thanks the Blood bank Sanquin, The Netherlands. The BREOGAN study would not have been possible without the contributions of the following: Manuela Gago-Dominguez, Jose Esteban Castelao, Angel Carracedo, Victor Muñoz Garzón, Alejandro Novo Domínguez, Maria Elena Martinez, Sara Miranda Ponte, Carmen Redondo Marey, Maite Peña Fernández, Manuel Enguix Castelo, Maria Torres, Manuel Calaza (BREOGAN), José Antúnez, Máximo Fraga and the staff of the Department of Pathology and Biobank of the University Hospital Complex of Santiago-CHUS, Instituto de Investigación Sanitaria de Santiago, IDIS, Xerencia de Xestión Integrada de Santiago-SERGAS; Joaquín González-Carreró and the staff of the Department of Pathology and Biobank of University Hospital Complex of Vigo, Instituto de Investigación Biomedica Galicia Sur, SERGAS, Vigo, Spain. The BSUCH study acknowledges the Principal Investigator, Barbara Burwinkel, and,

thanks Peter Bugert, Medical Faculty Mannheim. CCGP thanks Styliani Apostolaki, Anna Margiolaki, Georgios Nintos, Maria Perraki, Georgia Saloustrou, Georgia Sevastaki, Konstantinos Pompodakis. CGPS thanks staff and participants of the Copenhagen General Population Study. For the excellent technical assistance: Dorthe Uldall Andersen, Maria Birna Arnadottir, Anne Bank, Dorthe Kjeldgård Hansen. The Danish Cancer Biobank is acknowledged for providing infrastructure for the collection of blood samples for the cases. FHRISK and PROCAS thank NIHR for funding. The GENICA Network: Dr. Margarete Fischer-Bosch-Institute of Clinical Pharmacology, Stuttgart, and University of Tübingen, Germany [HB, RH, Wing-Yee Lo], Department of Internal Medicine, Johanniter GmbH Bonn, Johanniter Krankenhaus, Bonn, Germany [Yon-Dschun Ko, Christian Baisch], Institute of Pathology, University of Bonn, Germany [Hans-Peter Fischer], Molecular Genetics of Breast Cancer, Deutsches Krebsforschungszentrum (DKFZ), Heidelberg, Germany [Ute Hamann], Institute for Prevention and Occupational Medicine of the German Social Accident Insurance, Institute of the Ruhr University Bochum (IPA), Bochum, Germany [Thomas Brüning, Sylvia Rabstein, Anne Lotz], and Institute of Occupational Medicine and Maritime Medicine, University Medical Center Hamburg-Eppendorf, Germany [Volker Harth]. HABCS thanks Michael Bremer. HEBCS thanks Maija Suvanto, Kristiina Aittomäki, Kirsimari Aaltonen, Karl von Smitten, Outi Malkavaara. KARMA and SASBAC thank the Swedish Medical Research Counsel. KBCP thanks Eija Myöhänen. kConFab/AOCS wish to thank Heather Thorne, Eveline Niedermayr, all the kConFab research nurses and staff, the heads and staff of the Family Cancer Clinics, and the Clinical Follow Up Study (which has received funding from the NHMRC, the National Breast Cancer Foundation, Cancer Australia, and the National Institute of Health (USA)) for their contributions to this resource, and the many families who contribute to kConFab.

MARIE thanks Petra Seibold, Nadia Obi, Sabine Behrens, Ursula Eilber and Muhabbet Celik. MBCSG (Milan Breast Cancer Study Group) thanks: Paolo Radice, Bernard Peissel, Jacopo Azzollini, Erica Rosina, Daniela Zaffaroni, Bernardo Bonanni, Irene Feroce, Mariarosaria Calvello, Aliana Guerrieri Gonzaga, Monica Marabelli, Davide Bondavalli and the personnel of the Cogentech Cancer Genetic Test Laboratory. The MCCS was made possible by the contribution of many people, including the original investigators, the teams that recruited the participants and continue working on follow-up, and the many thousands of Melbourne residents who continue to participate in the study. The following are NBCS Collaborators: Kristine K. Sahlberg (PhD), Anne-Lise Børresen-Dale (Prof. Em.), Inger Torhild Gram (Prof.), Karina Standahl Olsen (Ass. Prof.), Olav Engebråten (MD), Bjørn Naume (MD), Jürgen Geisler (MD), OSBREAC and Grethe I. Grenaker Alnæs (MSc). The OFBCR thanks Teresa Selander, Nayana Weerasooriya and Gord Glendon. PBCS thanks Louise Brinton, Mark Sherman, Neonila Szeszenia-Dabrowska, Beata Peplonska, Witold Zatonski, Pei Chao, Michael Stagner. The RBCS thanks Jannet Blom, Saskia Pelders, Wendy J.C. Prager – van der Smissen, and the Erasmus MC Family Cancer Clinic. We thank the SEARCH team. SKKDKFZS thanks all study participants, clinicians, family doctors, researchers and technicians for their contributions and commitment to this study. UBCS thanks all study participants, the ascertainment, laboratory and research informatics teams at Huntsman Cancer Institute and Intermountain Healthcare, and Justin Williams, Brandt Jones, Myke Madsen, Stacey Knight and Kerry Rowe for their important contributions to this study.

## Supplemental references

1. Dorling, L., Carvalho, S., Allen, J., González-Neira, A., Luccarini, C., Wahlström, C., Pooley, K.A., Parsons, M.T., Fortuno, C., Wang, Q., et al. (2021). Breast Cancer Risk Genes - Association Analysis in More than 113,000 Women. *N Engl J Med* 384, 428-439. [10.1056/NEJMoa1913948](https://doi.org/10.1056/NEJMoa1913948).
2. Fortuno, C., Lee, K., Olivier, M., Pesaran, T., Mai, P.L., de Andrade, K.C., Attardi, L.D., Crowley, S., Evans, D.G., Feng, B.J., et al. (2021). Specifications of the ACMG/AMP variant interpretation guidelines for germline TP53 variants. *Hum Mutat* 42, 223-236. [10.1002/humu.24152](https://doi.org/10.1002/humu.24152).
3. Sue Richards, N.A., Sherri Bale, David Bick, Soma Das, Julie Gastier-Foster, Wayne W. Grody, Madhuri Hegde, Elaine Lyon, Elaine Spector, Karl Voelkerding, Heidi L. Rehm (2015). Standards and guidelines for the interpretation of sequence variants: a joint consensus recommendation of the American College of Medical Genetics and Genomics and the Association for Molecular Pathology. *Genetics in Medicine* 17, 405-424. <https://doi.org/10.1038/gim.2015.30>.
4. Fortuno, C., Cipponi, A., Ballinger, M.L., Tavtigian, S.V., Olivier, M., Ruparel, V., Haupt, Y., Haupt, S., Study, I.S.K., Tucker, K., et al. (2019). A quantitative model to predict pathogenicity of missense variants in the TP53 gene. *Human Mutation* 40, 788-800. <https://doi.org/10.1002/humu.23739>.
5. Buuren, S.v. (2018). *Flexible imputation of missing data.*, Second edition Edition (Chapman & Hall/CRC).
6. White, I.R., and Royston, P. (2009). Imputing missing covariate values for the Cox model. *Statistics in Medicine* 28, 1982-1998. <https://doi.org/10.1002/sim.3618>.
7. Barnard, J., and Rubin, D.B. (1999). Small-Sample Degrees of Freedom with Multiple Imputation. *Biometrika* 86, 948-955.
8. Rubin, D.B. (1987). *Multiple Imputation for Nonresponse in Surveys* (Wiley).
9. Li, K.H., Raghunathan, T.E., and Rubin, D.B. (1991). Large-Sample Significance Levels from Multiply Imputed Data Using Moment-Based Statistics and an F Reference Distribution. *Journal of the American Statistical Association* 86, 1065-1073. [10.2307/2290525](https://doi.org/10.2307/2290525).
10. Therneau, T.M. (2021). A Package for Survival Analysis in R. R package version 3.2-13, <https://CRAN.R-project.org/package=survival>. <https://CRAN.R-project.org/package=survival>.
11. Therneau, T.M., and Grambsch, P.M. (2000). *Modeling Survival Data: Extending the Cox Model*, 1 Edition (Springer). <https://doi.org/10.1007/978-1-4757-3294-8>.
